# Supplementary material
Source: publisher figshare collection journal article supplement (https://acs.figshare.com/ndownloader/files/22863218)
Supplement: Supplementary file 1 [file 22863218]

## SUPPORTING INFORMATION

### Alkynyl Benzoxazines and Dihydroquinazolines as Cysteine Targeting Covalent Warheads and Their Application in Identification of Selective Irreversible Kinase Inhibitors

Kirsten McAulay\*, Emily A. Hoyt<sup>†</sup>, Morgan Thomas<sup>‡</sup>, Marianne Schimpl<sup>§</sup>, Michael S. Bodnarchuk, Hilary J. Lewis, Derek Barratt<sup>§</sup>, Deepa Bhavsar,<sup>¥</sup> David M. Robinson, Michael J. Deery<sup>†</sup>, Derek J. Ogg<sup>§,‡</sup>, Gonçalo J. L. Bernardes<sup>†,¶</sup>, Richard A. Ward, Michael J. Waring<sup>††</sup> and Jason G. Kettle\*

Oncology R&D, AstraZeneca, Cambridge, CB4 0WG, UK. <sup>¥</sup>Oncology R&D, AstraZeneca, Waltham MA 02451, USA. <sup>§</sup>Discovery Sciences, R&D BioPharmaceuticals, AstraZeneca, Cambridge, CB4 0WG, UK. <sup>†</sup>Department of Chemistry, University of Cambridge, Cambridge, CB2 1EW, UK. <sup>‡</sup>Cambridge Centre for Proteomics, Department of Biochemistry, University of Cambridge, Cambridge, CB2 1QW, UK. <sup>¶</sup>Instituto de Medicina Molecular, Faculdade de Medicina de Universidade de Lisboa, Avenida Prof. Egas Moniz, 1649-028 Lisboa, Portugal. <sup>††</sup>Northern Institute for Cancer Research, Chemistry, School of Natural and Environmental Sciences, Newcastle University, Bedson Building, Newcastle upon Tyne, NE1 7RU, UK.

#### Contents

|                                                                               |    |
|-------------------------------------------------------------------------------|----|
| Methods                                                                       | S2 |
| Glutathione Assay Procedure                                                   | S2 |
| Kinetics Experiment Procedures                                                | S3 |
| NMR                                                                           | S3 |
| LCMS                                                                          | S4 |
| X-ray Crystallography                                                         | S4 |
| Quantum Mechanical Modelling of Adduct Formation and Transition State Barrier | S7 |

|                                                                          |      |
|--------------------------------------------------------------------------|------|
| JAK3 Protein Incubation and Intact Mass Spec                             | S12  |
| Cysteine proteomics of <b>16</b> and <b>18</b> in H358 cells             | S14  |
| JAK3 Ligand Docking                                                      | S15  |
| PDGFR / KIT ligand docking                                               | S16  |
| Protein Labelling Reactions                                              | S16  |
| Reaction Evaluation by LC-MS                                             | S17  |
| C2Am Studies                                                             | S19  |
| C2Am-Cys95 reaction with Compound <b>11</b>                              | S19  |
| C2Am-Cys95 reaction with compound <b>5e</b>                              | S21  |
| Stability of C2Am-5e/ <b>11</b> conjugates in the presence of GSH (1 mM) | S23  |
| Stability of C2Am-5e/ <b>11</b> conjugates in human plasma               | S27  |
| Anti-HER2 2Rb17c nanobody Studies                                        | S33  |
| anti-HER2 2Rb17c reaction with <b>11</b>                                 | S34  |
| anti-HER2 2b17c reaction with <b>5e</b>                                  | S36  |
| Kinase Panel Data                                                        | S39  |
| Data for compound <b>16</b>                                              | S39  |
| Data for compound <b>17</b>                                              | S43  |
| Data for compound <b>18</b>                                              | S47  |
| Data for compound <b>26</b>                                              | S51  |
| Synthetic Experimental Section                                           | S64  |
| General Experimental                                                     | S64  |
| Experimental Procedures                                                  | S65  |
| References                                                               | S105 |

## Methods

### Glutathione Assay Procedure

Half-life of compounds with glutathione was determined by measuring the disappearance of parent over time. Compounds are incubated at 1  $\mu$ M concentration in the presence of 4.6 mM glutathione (GSH) at 37°C. Each run contains a maximum of 10 compounds including verapamil (used as an internal standard) and two in-house reference compounds. Dimethyl sulfoxide (DMSO) concentration is kept below 0.1%. Data are obtained on Waters UPLC ACQ-TQD with Acquity UPLC system using a Waters XSelect HSS T3 C18, 2.5 $\mu$ m, 2.1 x 50mm column. Gradient analysis was employed using decreasingly polar mixtures using 0.1% formic acid as solvent A and acetonitrile as solvent B (10 - 90% MeCN gradient). The slope value,  $k$ , is determined by linear regression of the natural logarithm of the area ratio (parent peak area normalised to verapamil peak area) of the parent drug vs. incubation time curve. The *in vitro* half-life (*in vitro*  $t_{1/2}$ ) is determined from the slope value: *in vitro*  $t_{1/2} = -(0.693/k)$ .

## Kinetics Experiment Procedures

### NMR

All NMR spectra were recorded on a Bruker 500 MHz instrument equipped with a 5 mm QNP cryoprobe. Chemical shifts ( $\delta$  values) are given in parts per million (ppm) and referenced to the DMSO signal (2.50 ppm). NMR experiments used standard pulse sequences available in TopSpin 4.0 (Bruker GmbH).  $^1\text{H}$  qNMR experiments were carried out using the standard 1D  $^1\text{H}$  30° pulse sequence at a constant temperature of 27 °C, and acquired as the summation of 4 transients and 1 equilibrating transient (signal unrecorded) with 30 s of relaxation time between transients. 64k points were used for acquisition covering a spectral width of 20 ppm. Data were collected at regular intervals for a defined number of experiments. Samples were retained within the spectrometer for the duration of the experiment and maintained at a steady 20 Hz rotation throughout. The experiment was controlled using a multi-acquisition automation program, which included Fourier-transform and basic phase-correcting commands. Data were processed using standard Bruker phase-correcting algorithm. Line broadening was maintained at 0.30 Hz throughout and a baseline correction was applied to the whole spectrum. Signals were integrated between defined chemical shift values at appropriate intervals throughout the course of the experiment.

NMR experiments were carried out according to a procedure reported by Golding et al.<sup>1</sup> Heterocycle (690  $\mu\text{L}$  from a stock solution in DMSO- $d_6$  containing 4.2  $\mu\text{mol}$  of compound) was added to a DMSO- $d_6$  solution (10  $\mu\text{L}$ ) containing DABCO (0.14 mg, 1.26  $\mu\text{mol}$ ) and DMF (0.33  $\mu\text{L}$ , 4.2  $\mu\text{mol}$ ) to afford a heterocycle concentration of 6 mM in a total volume of 700  $\mu\text{L}$ . *N*-acetylcysteine methyl ester (7.48 mg, 42  $\mu\text{mol}$ ) was added and the NMR tube containing the reagents was quickly inverted several times to aid mixing and dissolution. The thoroughly mixed solution was inserted into the NMR machine cavity and the acquisition of  $^1\text{H}$  NMR data was immediately initiated. The time between the addition of the *N*-acetylcysteine methyl ester and completion of the first  $^1\text{H}$  experiment was monitored and subsequent time intervals between experiments were calculated based on the defined parameters.

$$\begin{aligned}-\frac{d[sm]}{dt} &= k'[sm] \frac{K[cysteine]_0[DABCO]_e}{[DABCO^+]_e + K[DABCO]_e} \\ -\frac{d[sm]}{dt} &= k_{app}[sm] \\ \ln \frac{[sm]}{[sm]_{t=0}} &= -k_{app}[sm] \\ \frac{\ln 2}{k_{app}} &= t_{1/2}\end{aligned}$$

### LCMS

A solution of heterocycle (0.1 mL, 0.70  $\mu\text{mol}$ ) in DMSO (7 mM) and ( $\pm$ ) Verapamil HCl (0.1 mL, 0.70  $\mu\text{mol}$ ) in a 1:1 mixture of MeCN:water (7 mM) was added to pH8 buffer (1.2 mL) in an LCMS vial. 'Capped' amino acid (100  $\mu\text{L}$ , 10.00  $\mu\text{mol}$ ) in water (0.1 M) was subsequently added and the reaction monitored by LCMS with sampling every 15 minutes using a 2  $\mu\text{L}$  injection. UPLC was performed on CSH C18 reverse-phase silica, using a Waters XSelect CSH

C18 column with dimensions 2.1 x 50mm and particle size 1.7 micron. Gradient analysis was employed using decreasingly polar mixtures using 0.1% ammonia as solvent A and acetonitrile as solvent B (3 - 97% MeCN gradient). The slope value,  $k$ , is determined by linear regression of the natural logarithm of the area ratio (parent peak area normalised to verapamil peak area) of the parent drug vs. incubation time curve. The *in vitro* half-life (*in vitro*  $t_{1/2}$ ) is determined from the slope value: *in vitro*  $t_{1/2} = -(0.693/k)$ .

### X-ray Crystallography

Protein expression and purification was carried out as described previously<sup>2</sup>. All structures were obtained by co-crystallization after 2-hour pre-incubation with a 3-fold molar excess of inhibitor. Crystallization conditions as well as data collection and refinement statistics are available from the PDB database. X-ray diffraction data were collected at Diamond Light source beamlines I03 and I04, and Soleil beamline Proxima I. Images were processed using XDS<sup>3</sup>, Aimless<sup>4</sup> and other programmes from the CCP4 suite<sup>5</sup>. Structures were solved by molecular replacement using Phaser and automatic refinement with Buster<sup>6</sup> was interspersed with manual refinement using Coot<sup>7</sup>. Initial ligand topologies and restraints were generated by Grade<sup>8</sup>. PDB depositions are available for compounds **24** (6XV9 and 6XVJ), **25** (6XVA) and **26** (6XVB and 6XVK).

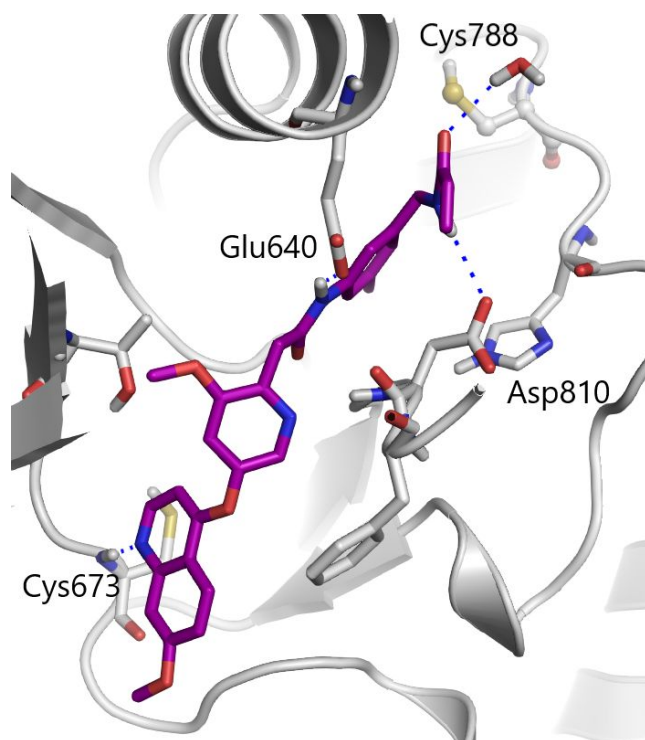

**Figure S1.** Crystal structure of compound **25** bound in c-KIT (6XVA).

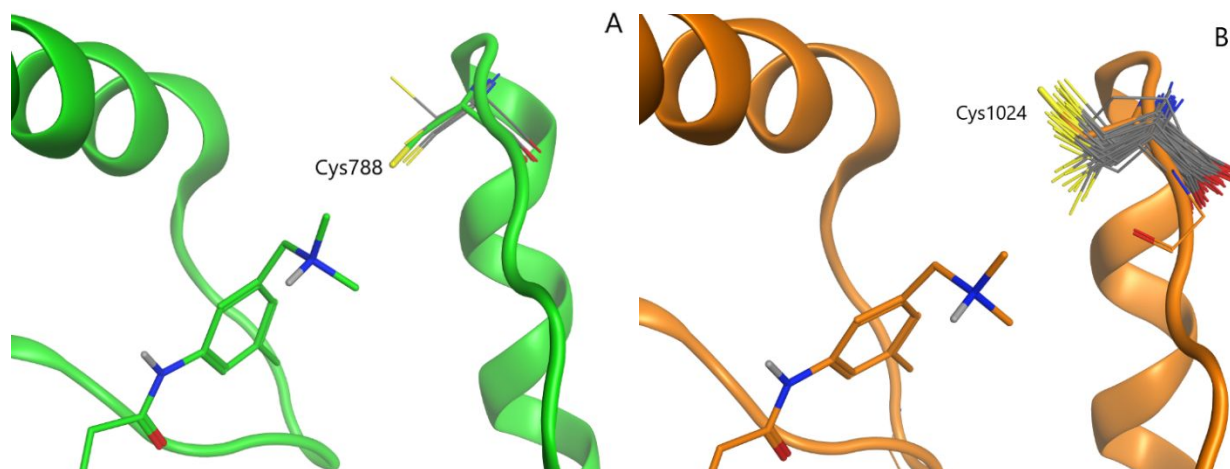

**Figure S2.** Analysis of cysteine positioning in c-KIT and KDR. A. Overlay of Cys788 position of c-KIT in PDB crystal structures with compound **24** bound (6XV9). B. Overlay of Cys1024 position of KDR in PDB crystal structures with compound **24** bound (6XVJ).

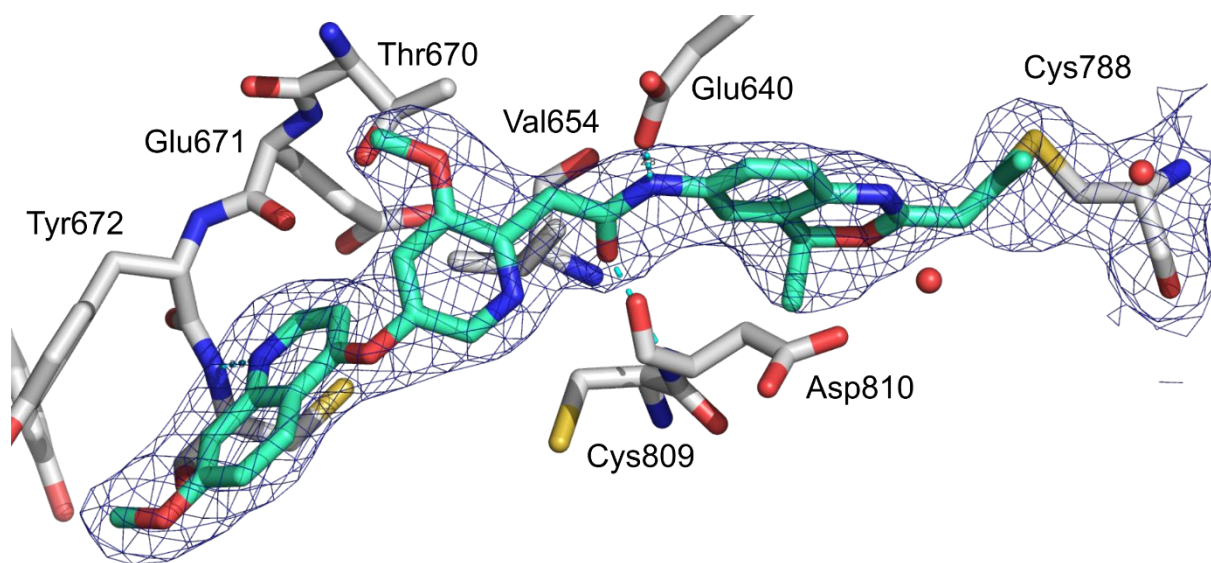

**Figure S3.** Crystal structure (2.15 Å) of compound **26** covalently bound to c-KIT Cys788. Composite  $2|F_o| - |F_c|$  electron density map is shown contoured at  $1\sigma$ .

**Table S1.** Comparison of the *in vitro* pharmacokinetic properties of compounds **25** and **26**

|                            | <b>26</b> | <b>25</b> |
|----------------------------|-----------|-----------|
| KIT IC <sub>50</sub> (μM)* | 2.12      | 0.21      |

|                                         |       |      |
|-----------------------------------------|-------|------|
| KDR IC <sub>50</sub> (μM)**             | 0.98  | 0.53 |
| GSH t <sub>1/2</sub> (min) <sup>a</sup> | 65    | 136  |
| PPB (% free) <sup>b</sup>               | <0.35 | 1.4  |
| Rat Heps (μL/min) <sup>c, d</sup>       | 93    | 289  |
| Hu Mics (μL/min/mg) <sup>c, e</sup>     | 36    | 62   |
| LogD                                    | 4.2   | 4.0  |
| Solubility (μM) <sup>f</sup>            | 2     | 0.7  |

\* [ATP] 300 μM. \*\* [ATP] 75 μM. <sup>a</sup>Determined by rate of disappearance of parent using LCMS. <sup>b</sup>Determined by rapid equilibrium dialysis at 5 μM compound concentration using 100% plasma at 37°C. <sup>c</sup> Intrinsic clearances are obtained from the first order rate constant of loss of parent compound at 37°C <sup>d</sup>Compound concentration 1 μM, hepatocyte concentration 10<sup>6</sup> cells/mL. <sup>e</sup>Compound concentration 1 μM, microsomal protein 1 mg/mL, 1 mM NADPH. <sup>f</sup>Solubility from dried DMSO solution in PBS (phosphate buffer solution) pH 7.4.

#### Quantum Mechanical Modelling of Adduct Formation and Transition State Barrier

Compounds **4a-14** and MeS<sup>-</sup> (surrogate for GSH) were imported into Maestro in SMILES format and prepared using LigPrep for the addition of hydrogen atoms. All compounds were preliminarily geometry optimized with Jaguar at the B3LYP/6-31G(d,p) level of theory, subsequently compounds were overlaid using SMARTS matching to ensure modelling consistency. Compound adducts were modelled using the compound optimized geometries and the MeS<sup>-</sup> was added in the s-cis conformation following observations that this conformation was approximately 1.5 kcal/mol lower in energy than s-trans,<sup>9</sup> which was also in agreement with this study [data not included]. Resulting energies and lowest energy molecular orbital (LUMO) of both compounds and compound adducts were calculated using Guassian16 M06-2X/6-31G(d,p)-IEF-PCM(water) level of theory QM. For a subset of compounds (**4a-5a**, **5e**, **8**, **12** and **13**) transition state energy was calculated using quadratic synchronous transit method (qst3) using Guassian16, this method is significantly more computationally expensive hence, a smaller subset was used to confirm the close linear relationship with adduct formation energy. One imaginary frequency was confirmed for all transition states.

**Table S2.** Key Experimental and Calculated values for compounds **4-14**

| Compound number | GSH t <sub>1/2</sub> (min) | Buffer t <sub>1/2</sub> (min) | LUMO (Hartree) | Adduct Formation Energy (kcal/mol) | Transition State Energy Barrier (kcal/mol) |
|-----------------|----------------------------|-------------------------------|----------------|------------------------------------|--------------------------------------------|
| <b>4a</b>       | 299                        | >10000                        | -0.02663       | 1.370480748                        | 4.627255053                                |
| <b>4b</b>       | >10000                     | >10000                        | -0.01983       | 3.847260744                        | 6.885661743                                |

|                         |        |        |          |              |             |
|-------------------------|--------|--------|----------|--------------|-------------|
| <b>4c</b>               | >10000 | >10000 | -0.01733 | 4.223138935  | 6.947157674 |
| <b>4d</b>               | 19     | >10000 | -0.02594 | -8.089224964 | 4.453434922 |
| <b>4e</b>               | 1268   | >10000 | -0.01887 | -2.353160625 | 7.123487844 |
| <b>5a</b>               | NV     | 2680   | -0.03106 | -4.025473443 | 2.025600666 |
| <b>5b</b>               | 1.6    | 3464   | -0.02666 | -3.514680709 |             |
| <b>5c</b>               | 1.4    | 609    | -0.0299  | -1.65599757  |             |
| <b>5d</b>               | 7      | >10000 | -0.03341 | -9.70192438  |             |
| <b>5e</b>               | 82     | >10000 | -0.02739 | -4.523715986 | 5.526476166 |
| <b><i>o</i>-MeO-5e</b>  | 74     | >10000 | -0.03126 | -1.505395291 |             |
| <b><i>m</i>-MeO-5e</b>  | 78     | >10000 | -0.03041 | -3.448792212 |             |
| <b><i>p</i>-MeO-5e</b>  | 133    | >10000 | -0.02535 | -1.44327185  |             |
| <b><i>m'</i>-MeO-5e</b> | 77     | >10000 | -0.02707 | -3.194023355 |             |
| <b>6</b>                | 206    | >10000 | -0.02638 | 0.224020891  |             |
| <b>7</b>                | 135    | 6153   | -0.02362 | 1.456449549  |             |
| <b>8</b>                | 620    | 6183   | -0.02996 | -3.933857056 | 6.744472106 |
| <b>9</b>                | 37     | >10000 | -0.02362 | -4.700673665 |             |
| <b>10</b>               | 66     | 5924   | -0.01006 | 0.90298617   |             |
| <b>11</b>               | 1.5    | >10000 | -0.01737 | 1.094376568  |             |
| <b>12</b>               | 55     | 70     | -0.0491  | -10.3570443  | 4.149092814 |
| <b>13</b>               | 79     | 3390   | -0.03235 | -3.582451736 | 6.842991097 |
| <b>14</b>               | 82     | >10000 | -0.03885 | -4.425824504 |             |

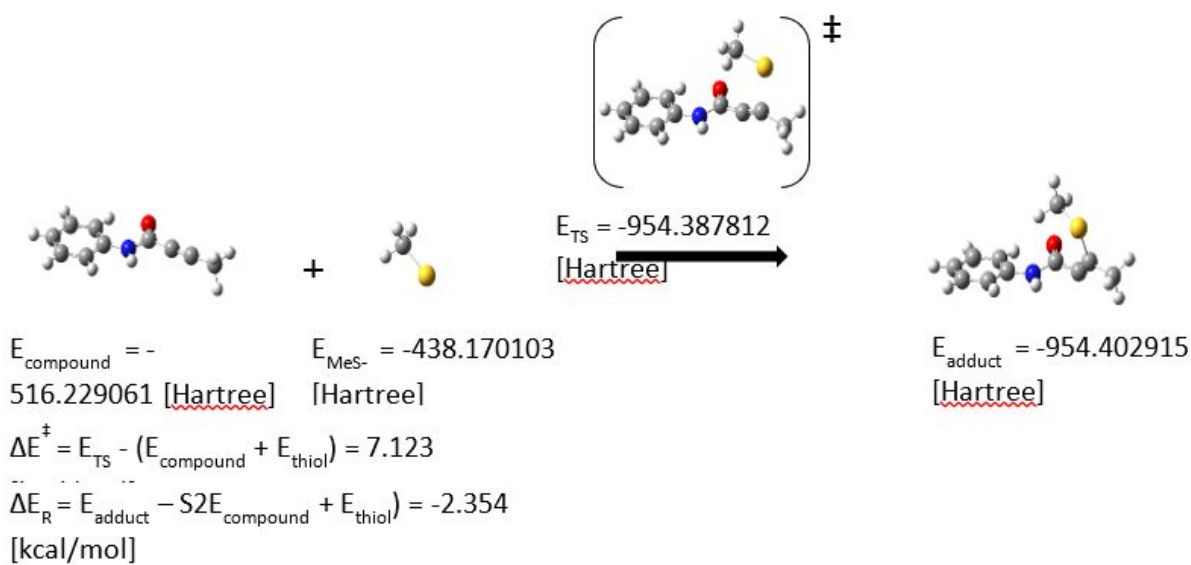

**Figure S4.** Scheme showing the reaction modelling and resultant energies using M06-2X/6-31G(d,p)-IEF-PCM level of theory for an example un-cyclised  $\beta$ -substituted acetylene warhead.

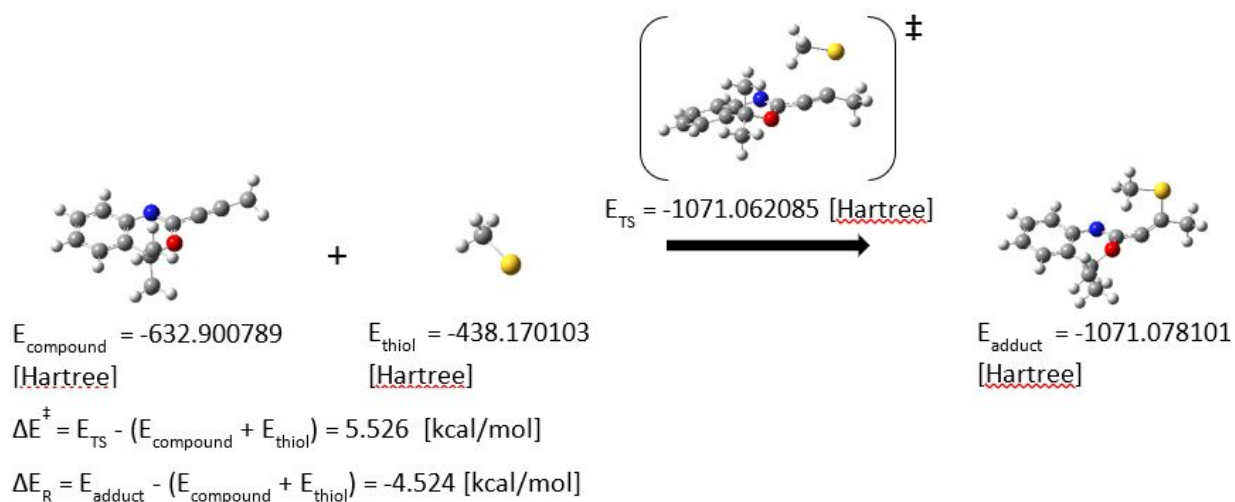

**Figure S5.** Scheme showing the reaction modelling and resultant energies using M06-2X/6-31G(d,p)-IEF-PCM level of theory for an example cyclised  $\beta$ -substituted acetylene warhead.



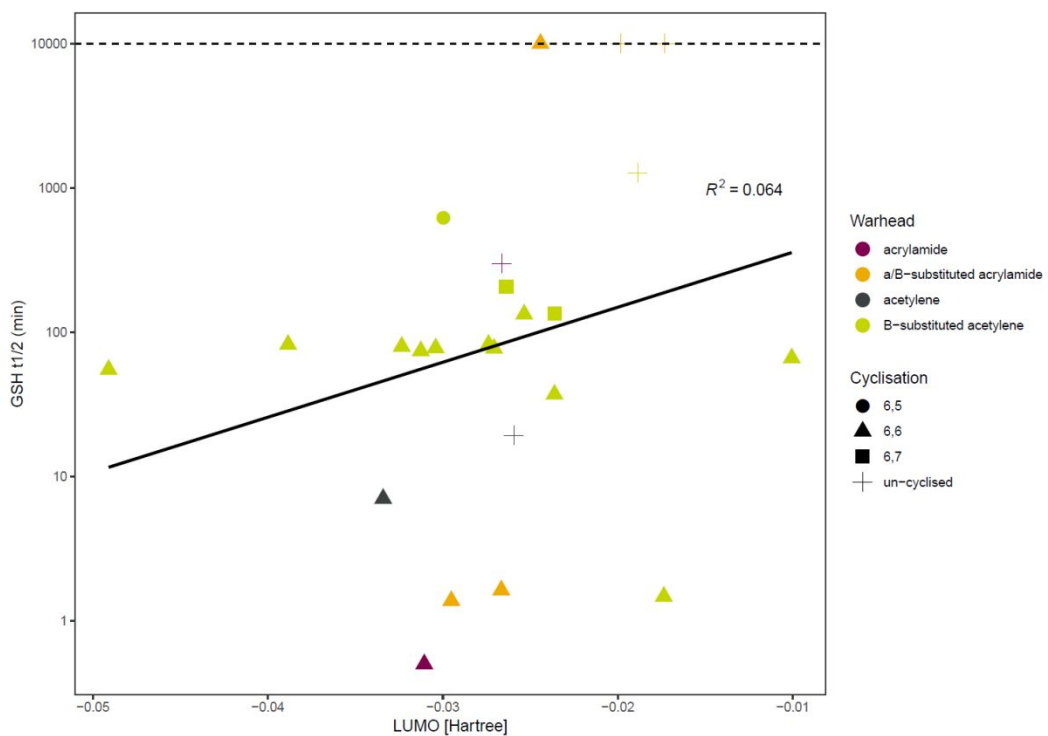

**Figure S6.** Correlation between glutathione half-life and LUMO energy

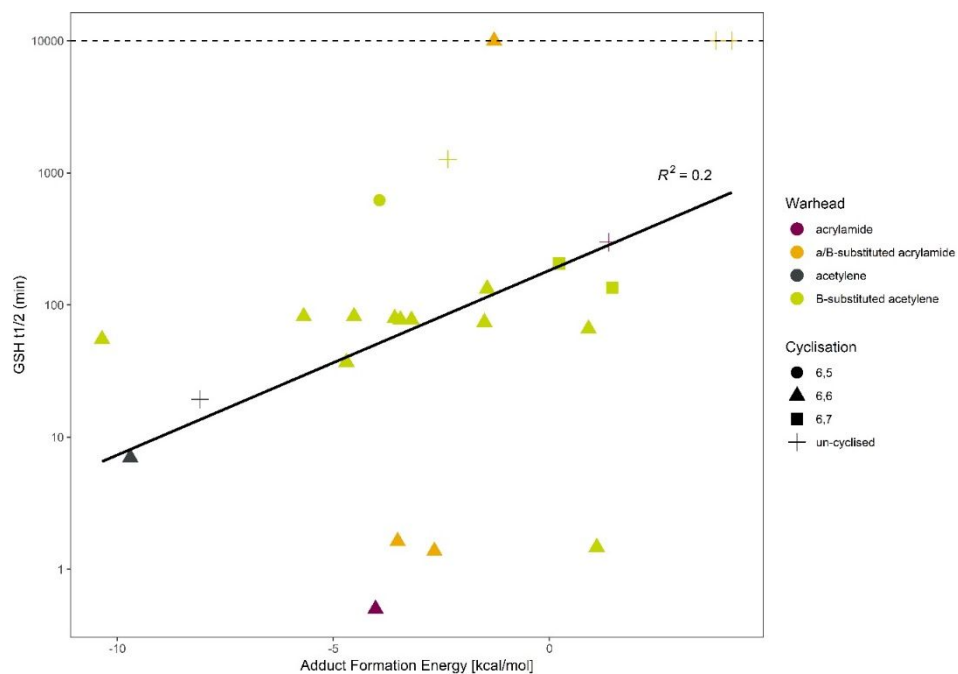

**Figure S7.** Correlation between glutathione half-life and adduct formation energy

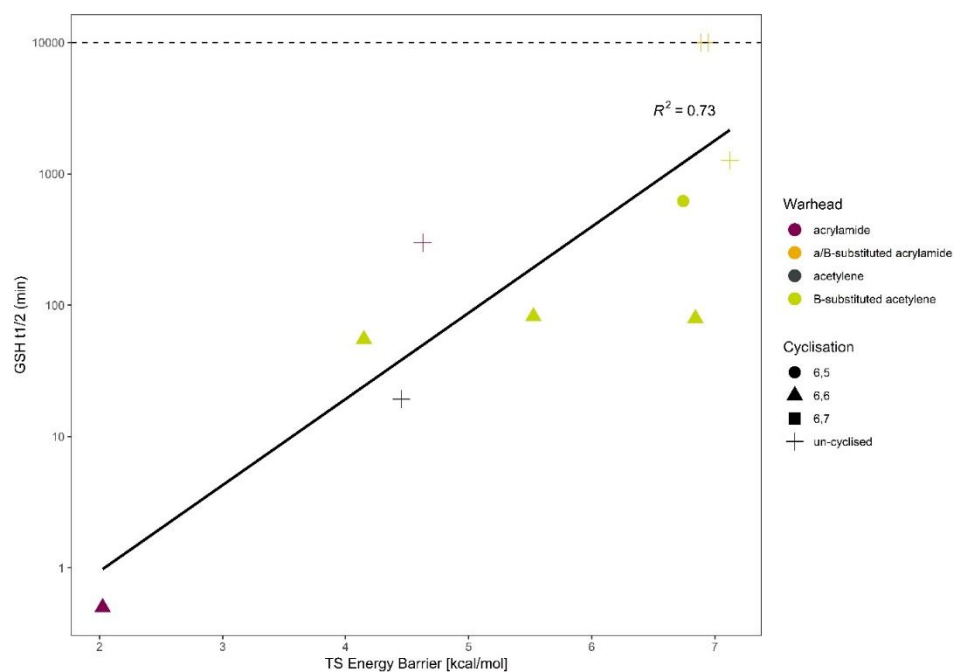

**Figure S8.** Correlation between glutathione half-life and TS energy barrier

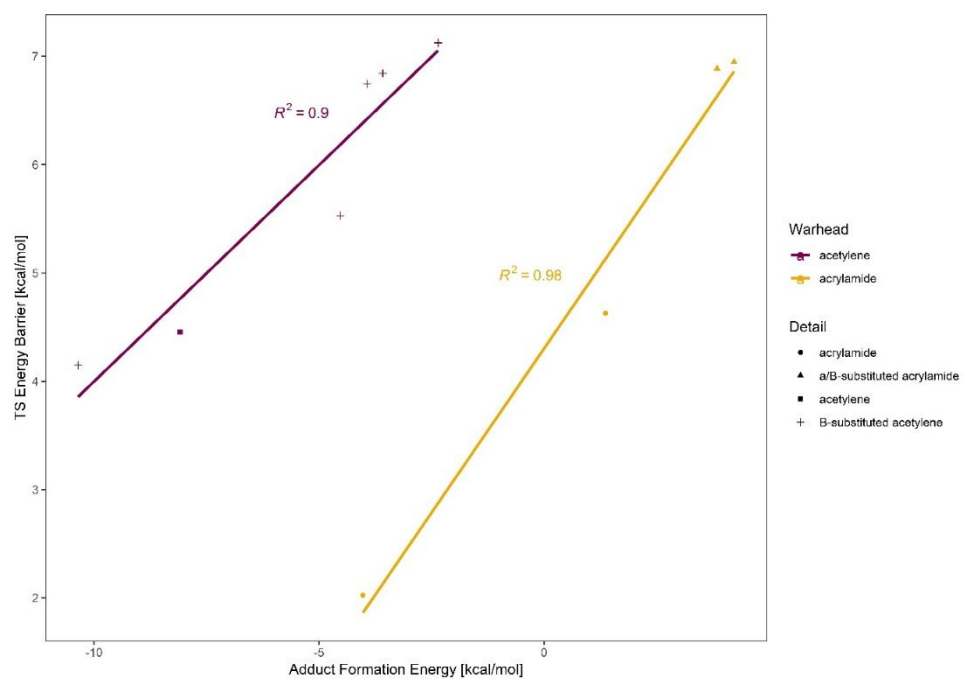

**Figure S9.** Correlation between adduct formation energy and TS energy barrier for acetylenes and acrylamides

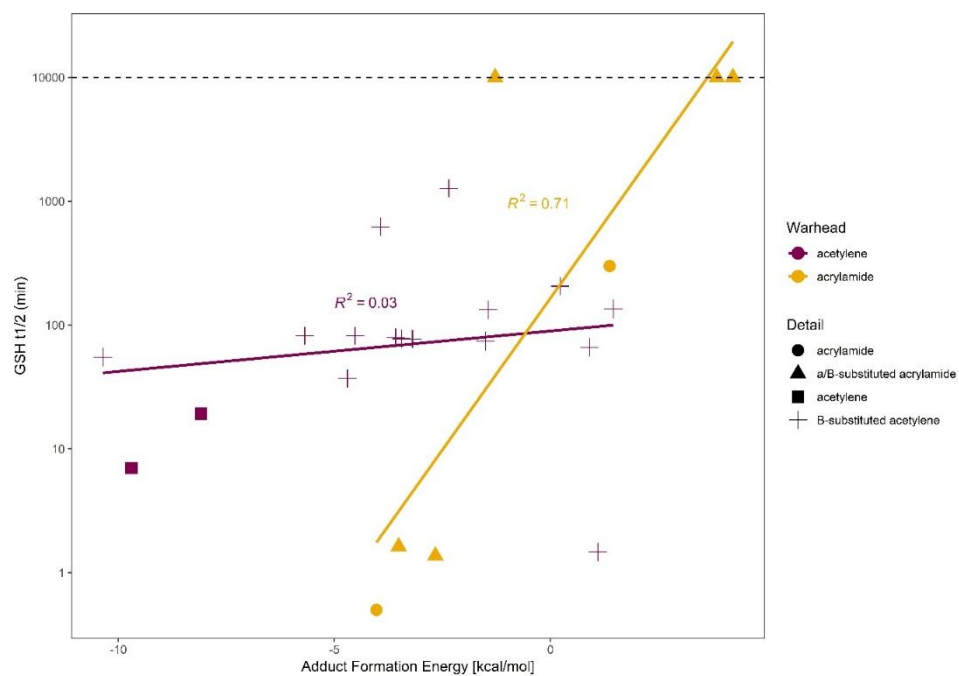

**Figure S10.** Correlation between glutathione half-life and adduct formation energy by warhead type

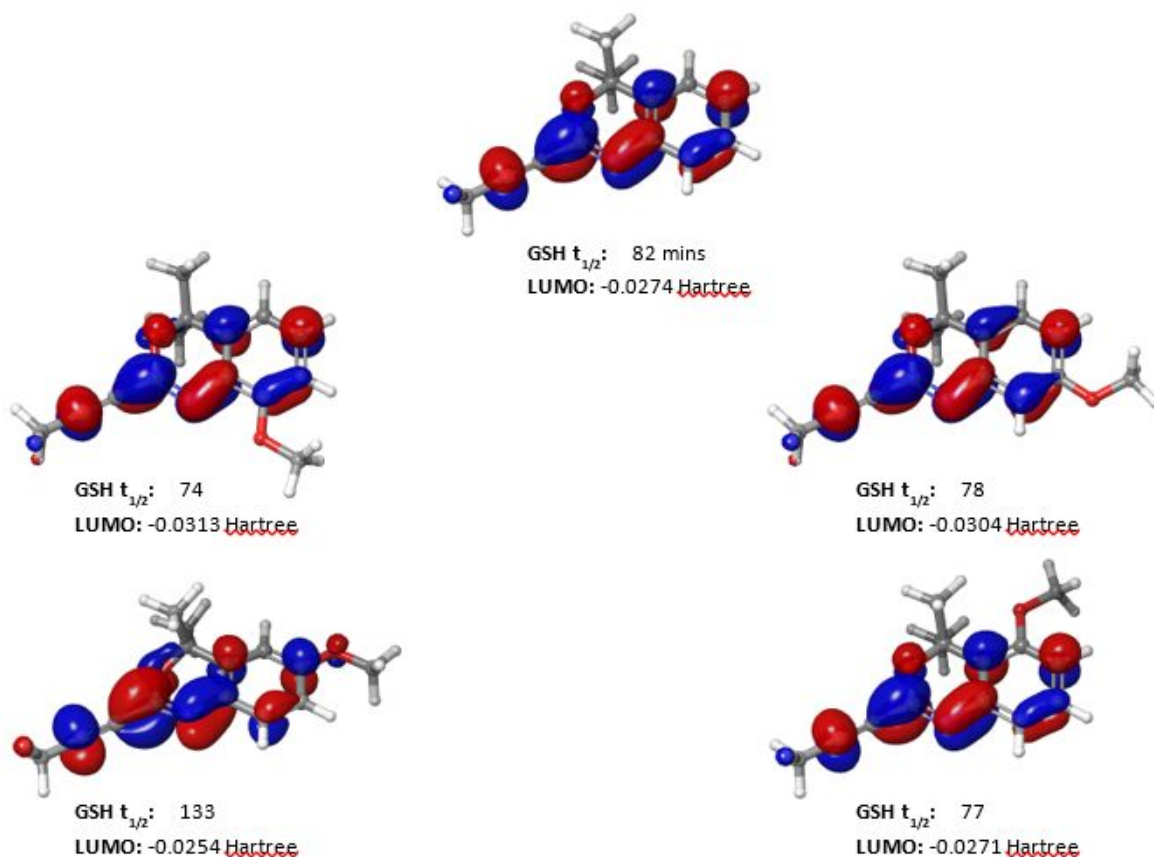

**Figure S11.** LUMO energy diagrams and glutathione half-lives for compound **5e** and its corresponding methoxy analogues

### JAK3 Protein Incubation and Intact Mass Spec

#### Incubation of JAK3 protein with covalent ligands

135  $\mu$ L of JAK3 protein (3.6  $\mu$ M, 0.24 mg/mL) was incubated with 0.675  $\mu$ L of compound **18** (10 mM in DMSO) for 3 hours at room temperature (final concentration 50  $\mu$ M, containing 0.5% DMSO). The sample was then snap frozen and stored at -80  $^{\circ}$ C. The above procedure was repeated using a literature JAK3 ligand *N*-[3-(7H-pyrrolo[2,3-d]pyrimidin-4-yl)phenyl]prop-2-enamide for comparison.<sup>10</sup> JAK3 protein was obtained from ThermoFisher (part no PV3855: 67.4 kDa, amino acids 781-1124, with GST tag) and supplied undiluted in storage buffer; 50mM Tris-HCl, pH 7.5, 150mM NaCl, 2mM DTT, 0.5mM EDTA, 0.02% Triton X-100, 50% glycerol.

#### Sample Preparation – Desalting

Samples were thawed on ice. To remove glycerol, salts and unreacted compound, protein samples were buffer exchanged and desalted using Thermo Scientific Zeba spin columns (89882). Columns were removed from the fridge 30 minutes before use and brought to room temperature. Columns were pre-equilibrated with 10mM Tris pH 8.0.

#### **Sample Preparation - Intact Mass Analysis**

Prior to intact analysis, protein was reduced by the addition of DTT (dithiothreitol) with incubation at 37 °C for 30 minutes. 100µl of water was added to a tube of Pierce™ DTT, No-Weigh™ Format (Thermo, A39255) to give a 0.5M stock solution. 2µl of this was added to each protein sample to give a final concentration of 10mM reducing agent.

#### **Intact Protein Analysis**

Intact protein samples were analysed by reversed phase LC-MS. The reverse-phase separations of reduced samples were performed on a UPLC system (Waters) with an Acquity Protein BEH C4 Column, 300Å, 1.7 µm, 2.1 mm X 50 mm using a gradient of 5-45% B from 3-14 minutes. Mobile phase B was acetonitrile with 0.1% formic acid or 0.01% trifluoroacetic acid, whilst solvent A was water with 0.1% formic acid or 0.01% trifluoroacetic acid. The flow rate was maintained at 0.150 ml/min, and column temperature was maintained at 65 °C.

Mass spectrometric analysis was performed on an Orbitrap Fusion Tribrid mass spectrometer (Thermo Scientific) operated in intact protein mode. The source voltage was set to 3500V for positive ionisation with a sheath gas (arb) of 35 and aux gas (arb) of 10. The ion transfer tube temperature was set to 300 °C. Orbitrap scan data was collected at a resolution of 15000 fwhm over an  $m/z$  range of 1000-3600 with an RF lens value of 80%. The AGC target was set of  $4e^5$  with a maximum inject time of 200 msec. All data were acquired using Xcalibur software and visualised using BioPharma Finder (Thermo Scientific).

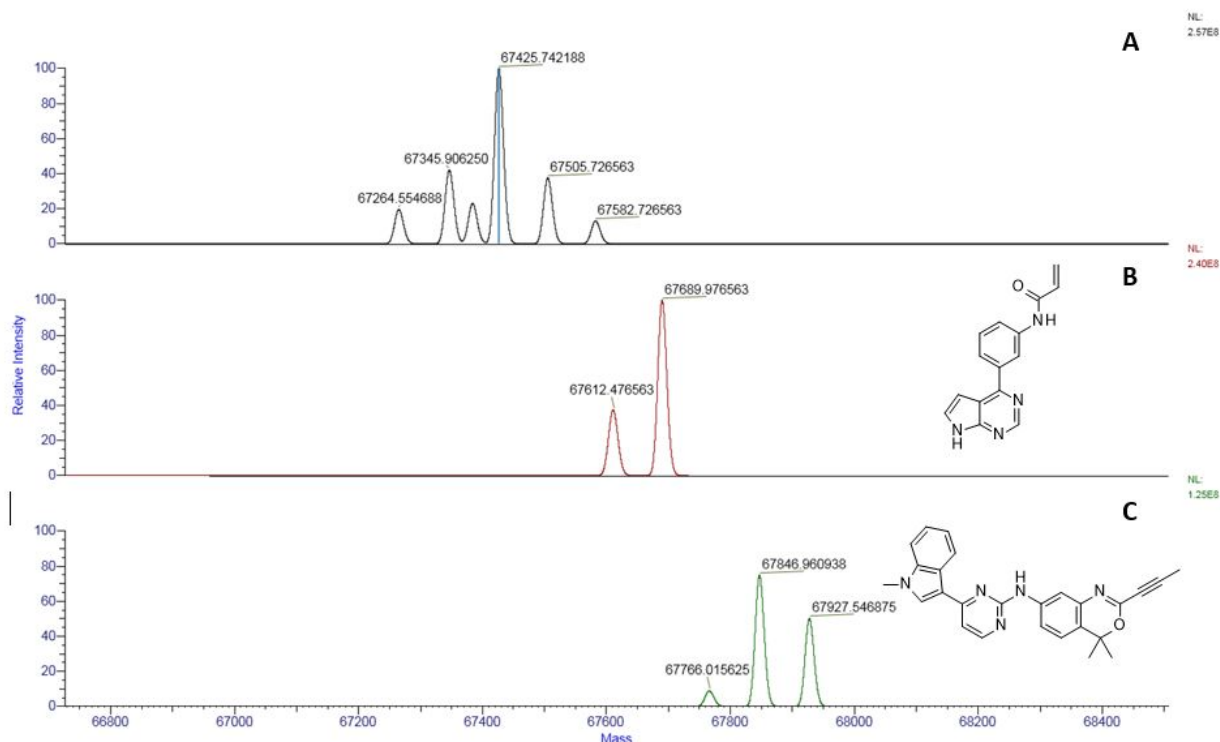

**Figure S12.** Intact mass analysis of JAK3 protein. A) MS of native JAK3 protein. B) MS of JAK3 with literature reference compound bound.<sup>10</sup> C) MS of JAK3 with compound **18** bound.

### Free cysteine reactivity profiling

NCI-H358 cells were treated in biological triplicate with compound **16**, **18** or vehicle for 2 hours. After washing with phosphate buffer saline, cells were lysed directly in lysis buffer with sonication. Exposed cysteine residues were labelled by incubation with 100 $\mu$ M iodoacetamide desthiobiotin (AstraZeneca) for 1 hour at room temperature. Unreacted iodoacetamide desthiobiotin was removed by acetone precipitation. Proteins were denatured in 8M urea, 50mM ammonium bicarbonate with addition of 10mM dithiothreitol and heating to 65oC for 20 minutes. Newly exposed cysteines were then capped by alkylation with 50mM iodoacetamide. Lysates were de-salted and sequencing grade trypsin added at a ratio of 1:50 (enzyme:protein) with digestion at 37oC overnight. Biotinylated peptides were enriched from the digest by incubation with streptavidin agarose resin (ThermoFisher Scientific) for 2 hours. The resin was sequentially washed with phosphate buffer saline and water before captured peptides were eluted in 50% (v/v) acetonitrile, 0.1% (v/v) trifluoroacetic acid. Peptides were dried by centrifugal evaporation and then resuspended in 0.1% (v/v) formic acid for analysis. The LC-MS/MS system consisted of an Acquity M-Class UPLC (Waters) coupled to a Fusion Tribrid Orbitrap mass spectrometer (ThermoFisher Scientific). Peptide separation was achieved across a 25cm HSS T3 column (Waters) using a 60-minute gradient ranging from 5-35% acetonitrile, 0.1%

formic acid at a flow rate of 0.3 $\mu$ l/min. Peptide identification was obtained by searching MS2 spectra against a database of the non-redundant human proteome downloaded from UniProt (ID:00000UP5640). Search parameters allowed variable modification of peptides as follows; cysteine desthiobiotinylation +296.185 Da, cysteine carbamidomethylation +57.021 Da and methionine oxidation +15.995 Da. Peptide identification and label free quantification between compound treated and vehicle samples was completed within Proteome Discoverer version 2.2 (ThermoFisher Scientific). The figure below highlights acrylamide **16** but not benzoxazine **18** binds to RTN4 and PAF1.

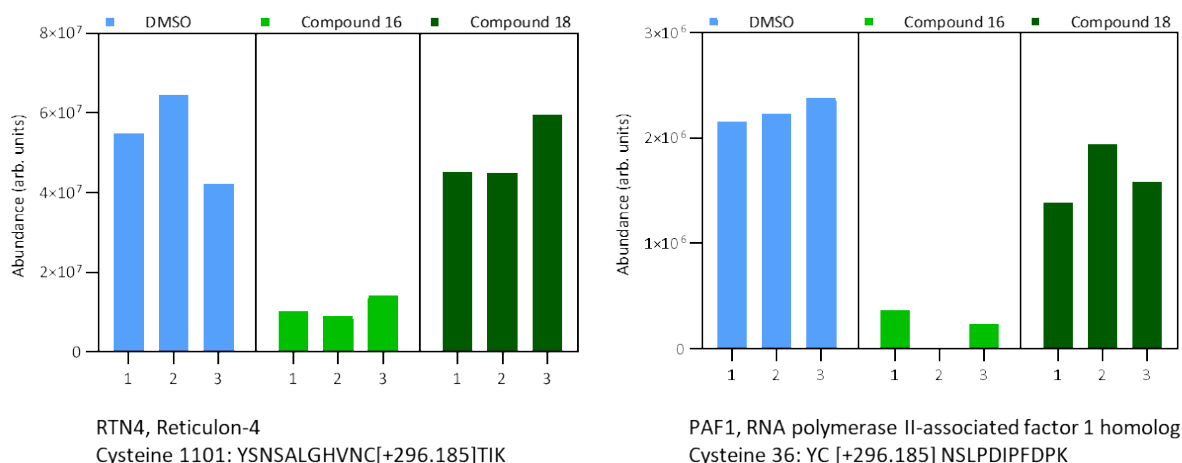

### JAK3 Ligand Docking

Molecular modelling was utilized to identify the likely binding mode of **18** in JAK3. **18** was covalently docked into the JAK3 crystal structure 4Z16. 4Z16 was prepared using the protein preparation modules in Maestro (version 2019-2) and overlaid, specifically adding and optimizing hydrogen positions. All water molecules were removed from the X-ray structures for modelling purposes. The covalent bond to Cys909 was manually formed using the builder module, followed by optimization of ligand and protein sidechains to identify a low energy binding mode. The predicted binding mode is shown to be in excellent agreement with the 4Z16 structure, shown in the green box.

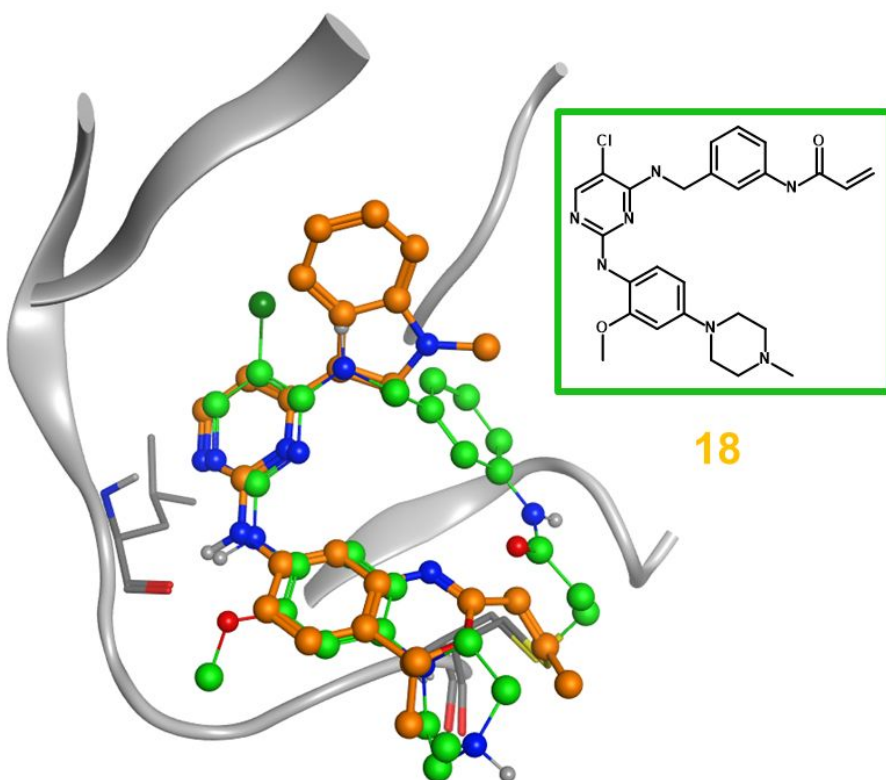

#### c-KIT ligand docking

Molecular modelling was utilized to rationally design **26** to c-KIT. 6XVA was prepared using the protein preparation modules in Maestro (version 2019-2), specifically adding and optimizing hydrogen positions. All water molecules were removed from the X-ray structures for modelling purposes. The predicted distance of the alkenyl warhead of **26** to Cys788 was 3.3 Å, consistent with the potential to form a covalent bond.

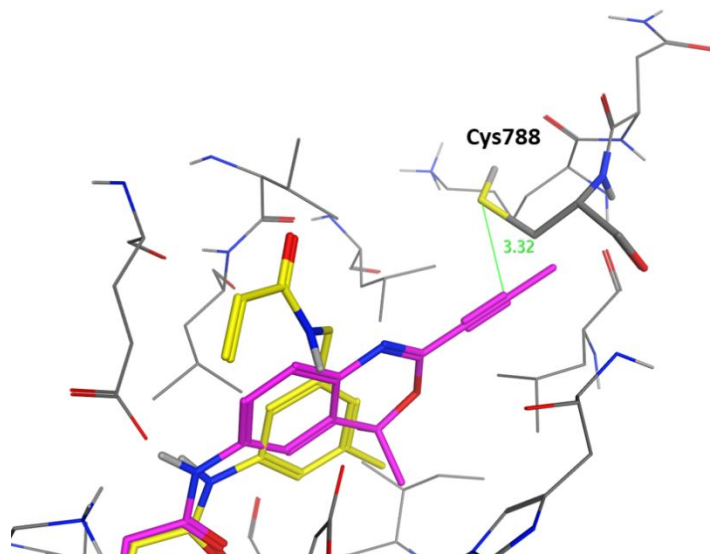

**Figure S13.** Modelling of the **26** predicts potential to access Cys788 in KIT.



### **PDGFR ligand docking**

Molecular modelling was utilized to identify the likely binding mode of **26** in an isoform of PDGFR. A binding site similarity analysis was carried out using PSILO (version 2019.01) from Chemical Computing Group which identified 5GRN\* as the PDGF isoform with the most similar ATP pocket (Score 108.015 and DPI 0.098Å). The crystal structure is of the PDGFRA isoform with WQ-C-159 bound, at 1.77 Å resolution. 0AKIT and 5GRN X-ray structures were then prepared using the protein preparation modules in Maestro (version 2019-2) and overlaid, specifically adding and optimizing hydrogen positions. All water molecules were removed from the X-ray structures for modelling purposes. WQ-C-159 was deleted from the 5GRN binding site and replaced with **26** from 0AKIT, with the covalent bond to Cys814 manually formed using the builder module. Ligand and protein side-chains were then optimized using macromodel to identify a suitable low energy binding mode.

\*X.E.Yan, C.H.Yun. Crystal structure of PDGFRA in complex with WQ-C-15. *To be published*

### **Protein Labelling Reactions**

#### **Reaction Evaluation by LC-MS**

All protein conjugation reactions were assessed using the LC-MS methods described below. As an example, the total ion chromatogram (TIC), combined ion series, and deconvoluted spectrum are shown for a C2Am-Cys95 control sample.

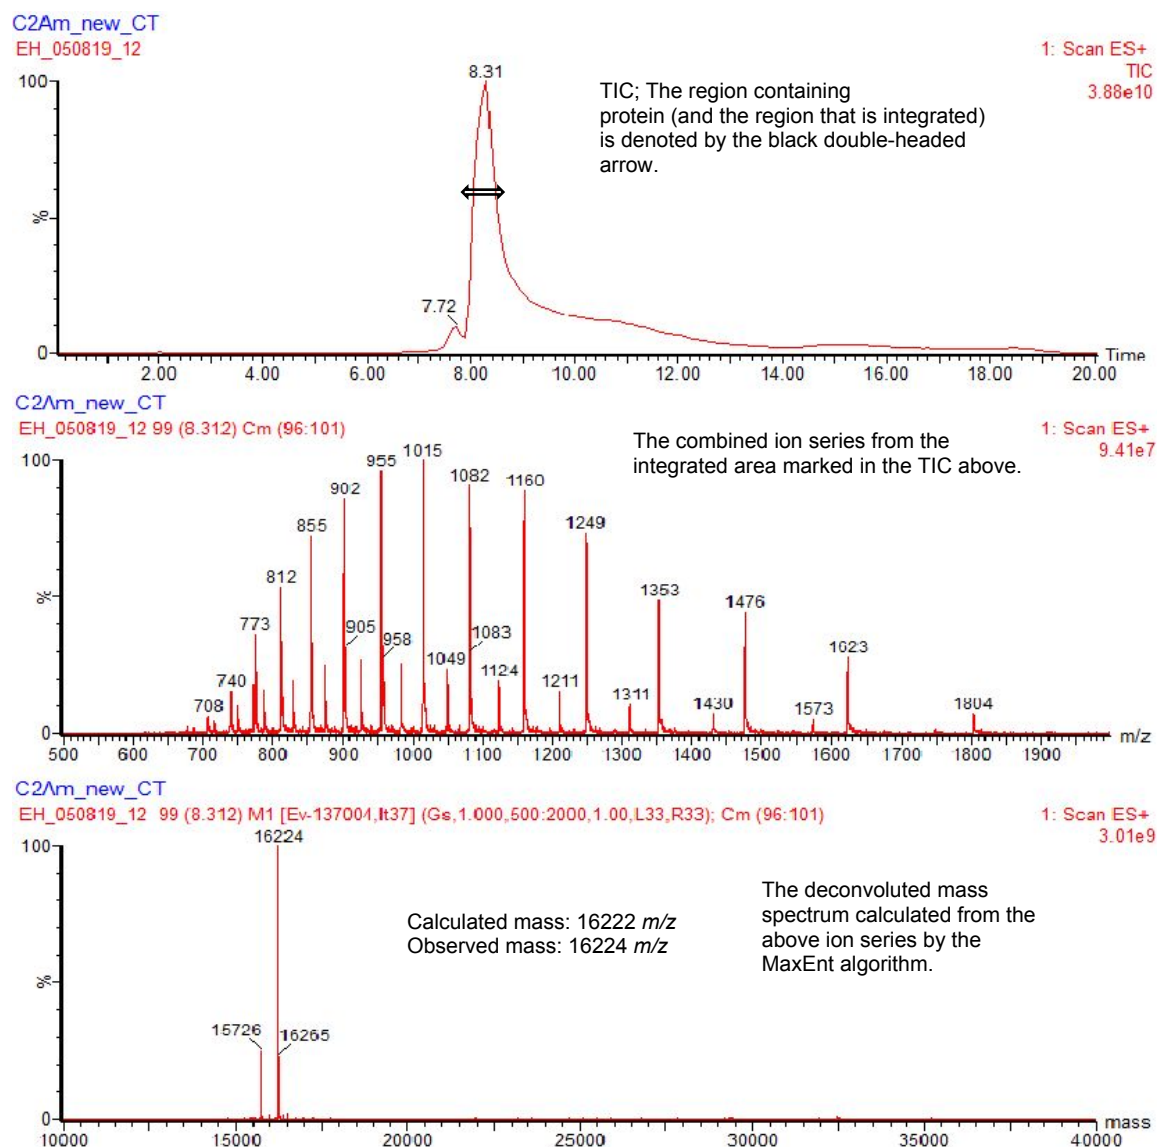

**Figure S14.** ESI-MS of C2Am-Cys95 control stored in the presence of DTT. Peak at 15726 m/z represents an impurity.

## C2Am Studies

C2Am-Cys95 (obtained from collaborator)<sup>11</sup>

Sequence (inserted Cys residue in bold and underlined):

GSPGISGGGGGILDSMVEKLGKLQYSLDYDFQNNQLLVGIIQAAELPALDMGGTSDPYVKVFLLPDKKKKFETKVHRKTLNPVFNEQ  
FTFKVPY**C**ELGGKTLVMAVYDFDRFSKHDIIGEFKVPMTNTVDFGHVTEEWRDLQSAEK

$M_w = 16222.58$  Da

### C2Am-Cys95 reaction with Compound 11

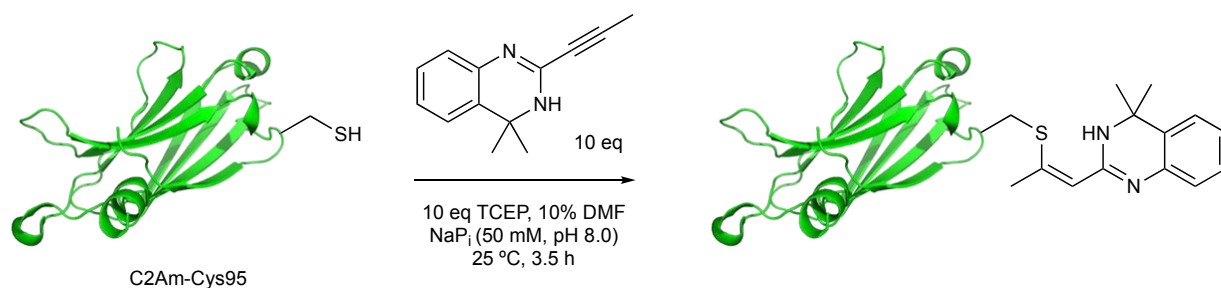

In a 35  $\mu$ L total reaction volume, C2Am-Cys95 (4.32  $\mu$ L at 81  $\mu$ M in 50 mM NaPi pH 8 buffer, 350 pmol, 10  $\mu$ M final concentration), **11** (1.75  $\mu$ L at 2 mM in DMF, 3.50 nmol, 100  $\mu$ M final concentration), and tris(2-carboxyethyl)phosphine (TCEP; 2.00  $\mu$ L at 1.75 mM in water, 3.50 nmol, 100  $\mu$ M final concentration) were added to DMF/NaPi (1.75  $\mu$ L DMF in 25.18  $\mu$ L 50 mM NaPi pH 8 buffer) and vortexed for 30 seconds. Samples of 10  $\mu$ L were taken from the reaction mixture for LC-MS analysis. Approximately 83% conversion was observed after 3.5 h at 25  $^{\circ}$ C with full conversion observed upon using higher equivalents of **11** under the same conditions (calculated mass: 16420  $m/z$ ; observed mass: 16420  $m/z$ ).\*

\*(M+41)<sup>+</sup> peaks for the products were observed, where the additional 41 Da is contributed from the acetonitrile in the mobile phase.

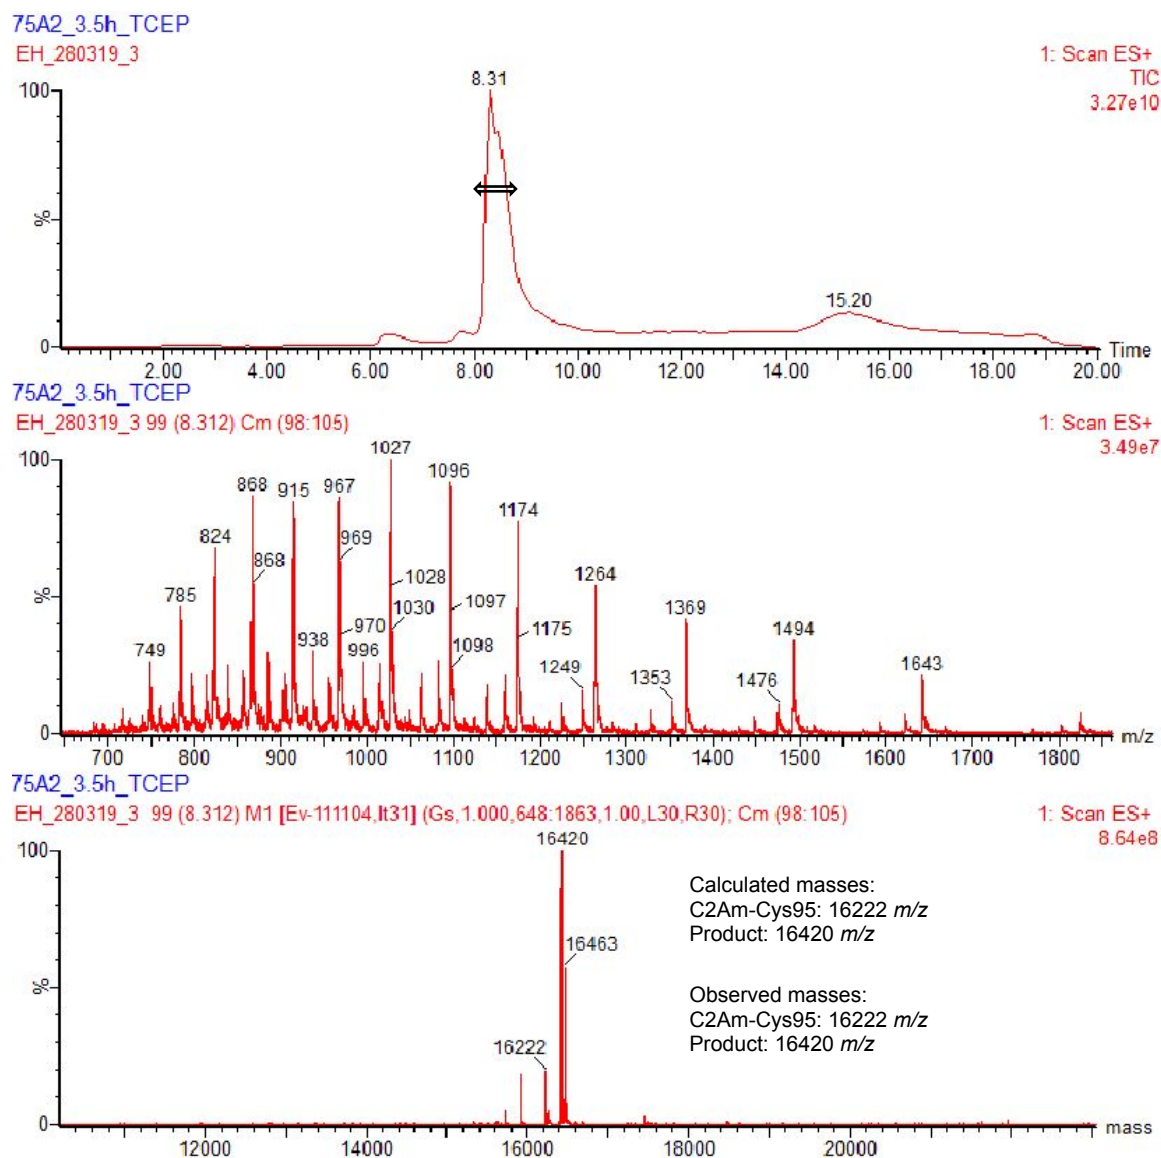

**Figure S15.** ESI-MS of the reaction of C2Am-Cys95 with **11** (10 eq) after being shaken for 3.5 h at 25 °C.

### C2Am-Cys95 reaction with compound 5e

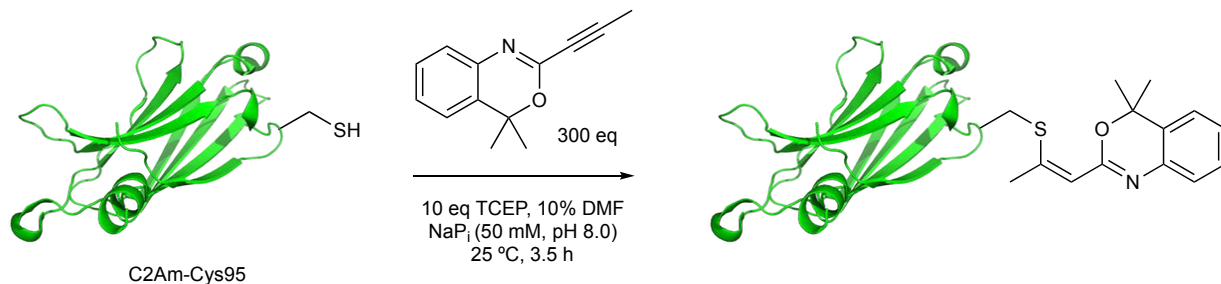

In a 35  $\mu\text{L}$  total reaction volume, C2Am-Cys95 (4.32  $\mu\text{L}$  at 81  $\mu\text{M}$  in 50 mM NaPi pH 8 buffer, 350 pmol, 10  $\mu\text{M}$  final concentration), **5e** (2.58  $\mu\text{L}$  at 40.7 mM in DMF, 105 nmol, 3 mM final concentration), and TCEP (2.00  $\mu\text{L}$  at 1.75 mM in water, 3.50 nmol, 100  $\mu\text{M}$  final concentration) were added to DMF/NaPi (0.92  $\mu\text{L}$  DMF in 25.18  $\mu\text{L}$  50 mM NaPi pH 8 buffer) and vortexed for 30 seconds. Samples of 10  $\mu\text{L}$  were taken from the reaction mixture for LC-MS analysis. Full conversion was observed after 3.5 h at 25 °C (calculated mass: 16421  $m/z$ ; observed mass: 16421  $m/z$ ).\*

\*(M+41)<sup>+</sup> peaks for the products were observed, where the additional 41 Da is contributed from the acetonitrile in the mobile phase.

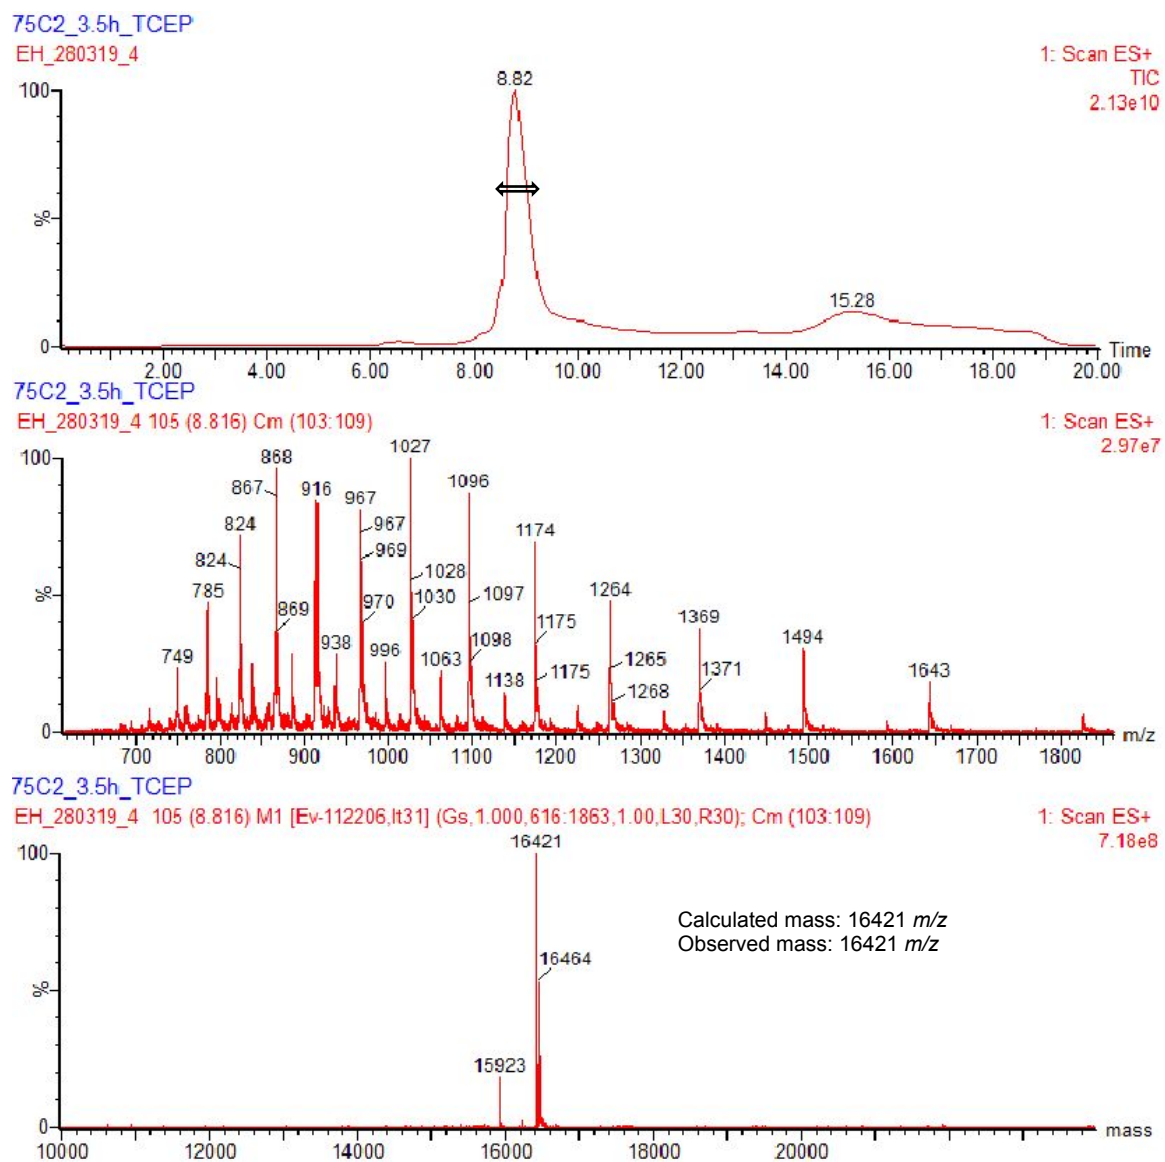

**Figure S16.** ESI-MS of the reaction of C2Am-Cys95 with **5e** (300 eq) after being shaken for 3.5 h at 25 °C.

### Stability of C2Am-5e/11 conjugates in the presence of GSH (1 mM)

A 10 mM stock solution of glutathione (GSH) was prepared in water. To 18  $\mu$ L of each C2Am-5e/11 conjugate (20  $\mu$ M, 360 pmol), 2  $\mu$ L of the GSH stock solution was added. Each mixture was vortexed and left to shake at 37  $^{\circ}$ C. Time points were taken at 24 h and 1 week. Evaluation of the stability of the conjugates was accomplished by LC-MS analysis of 10  $\mu$ L aliquots from each time point. While noticeable GSH replacement occurs for both conjugates, both conjugates are still present even after a 1 week incubation period.

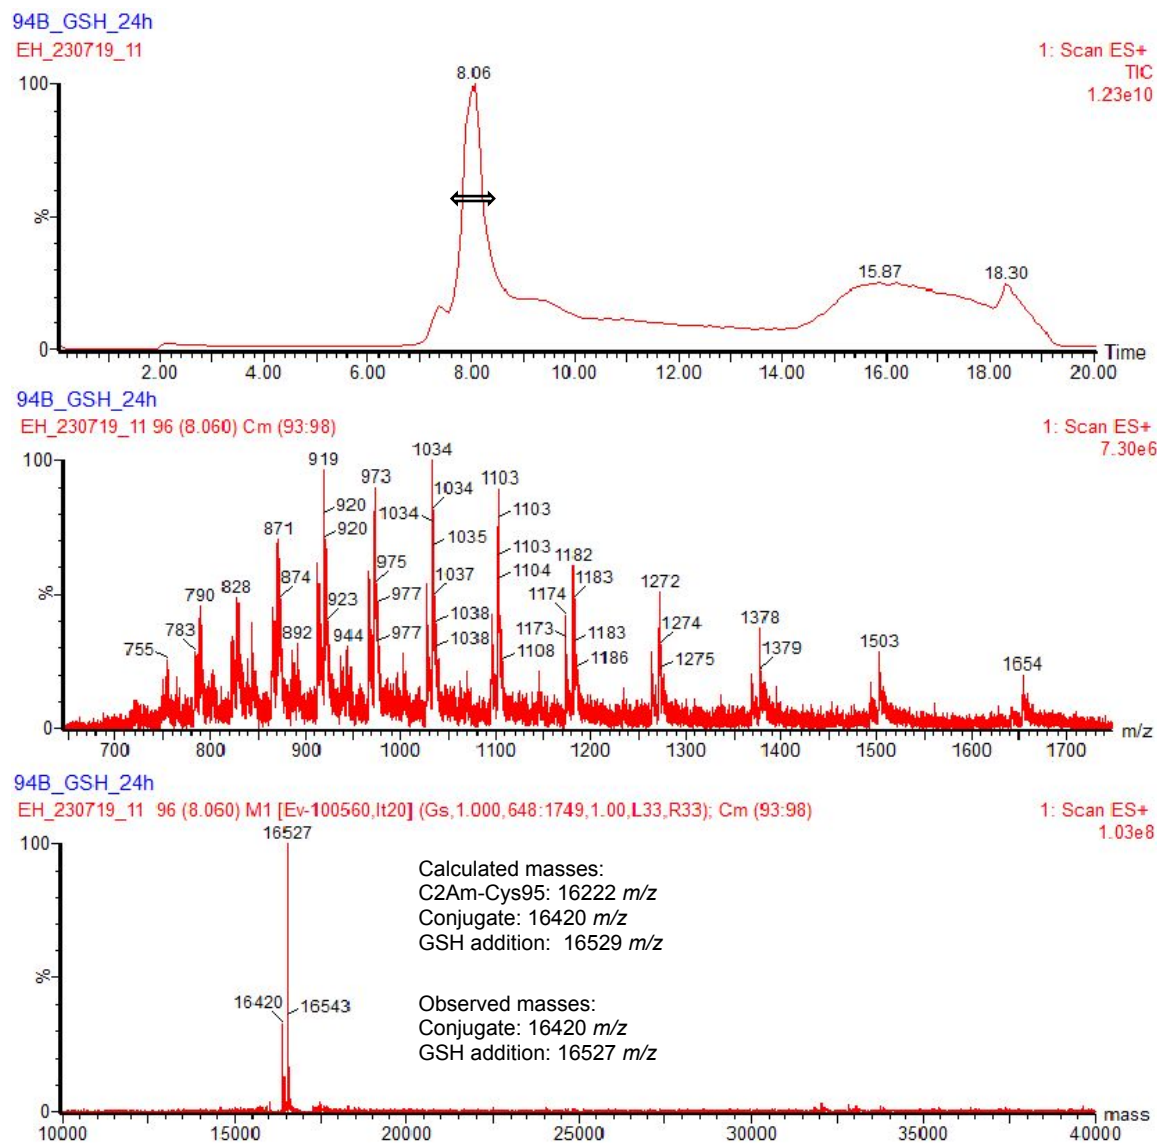

**Figure S17.** ESI-MS of C2Am-11 conjugate (N-Cys) after 24 h at 37  $^{\circ}$ C in the presence of 1 mM GSH.

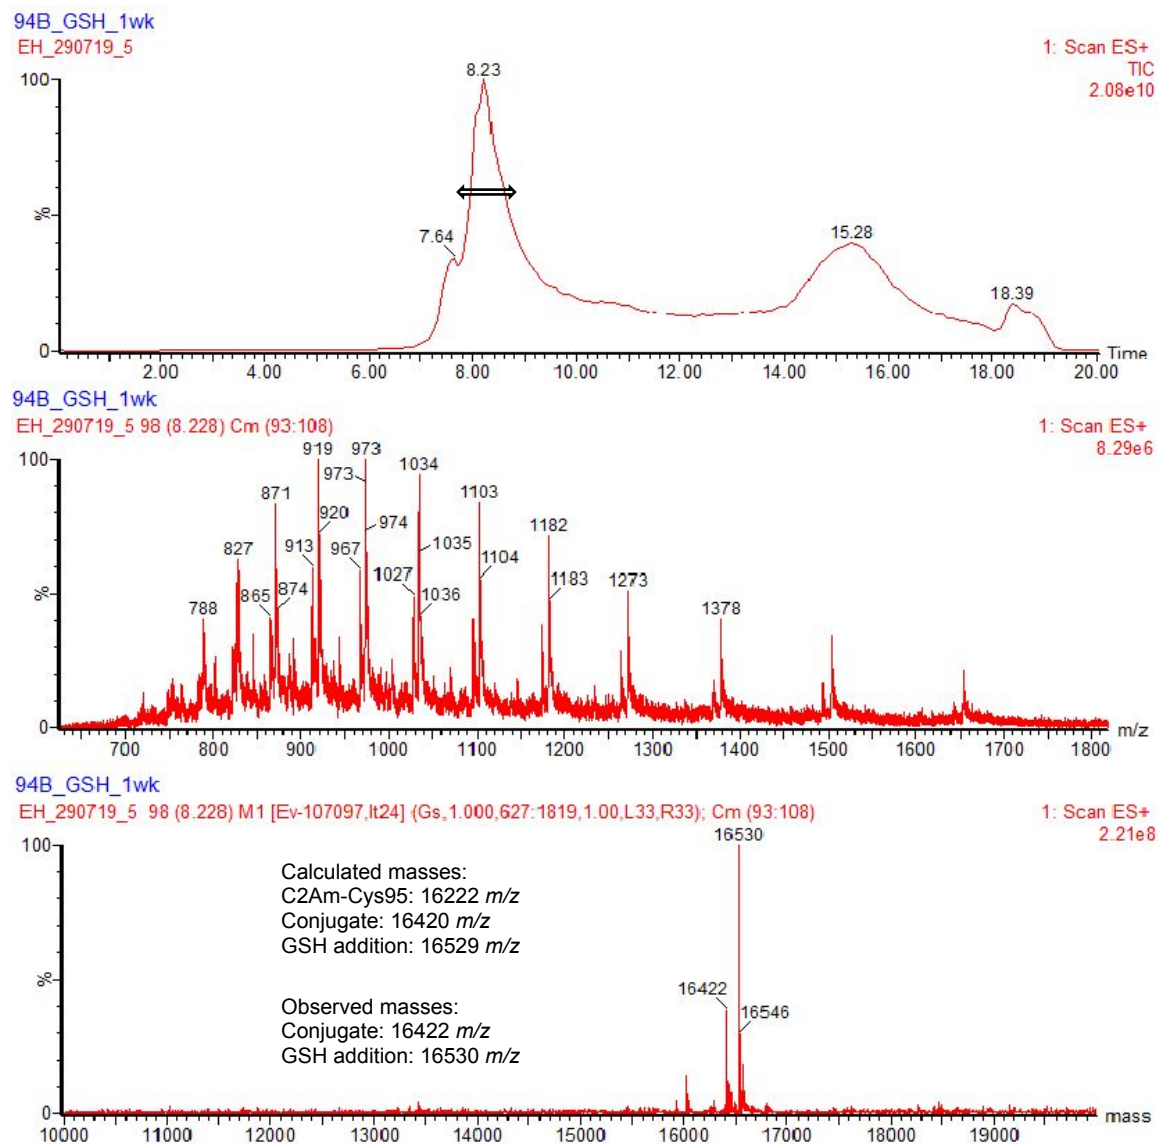

**Figure S18.** ESI-MS of C2Am-11 conjugate (N-Cys) after 1 week at 37 °C in the presence of 1 mM GSH.



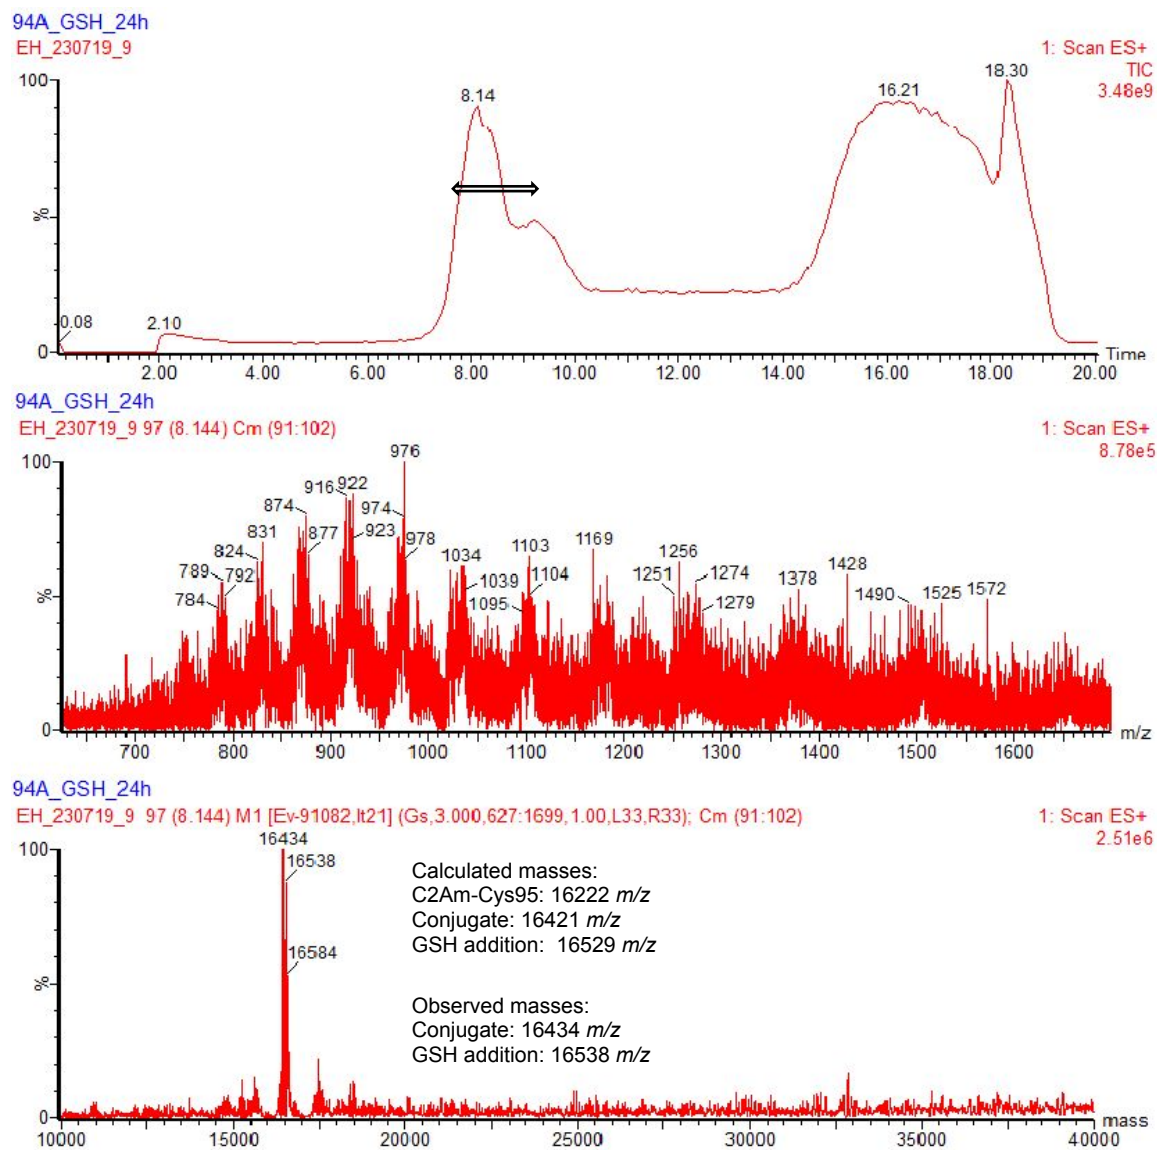

**Figure S19.** ESI-MS of C2Am-5e conjugate (O-Cys) after 24 h at 37 °C in the presence of 1 mM GSH.

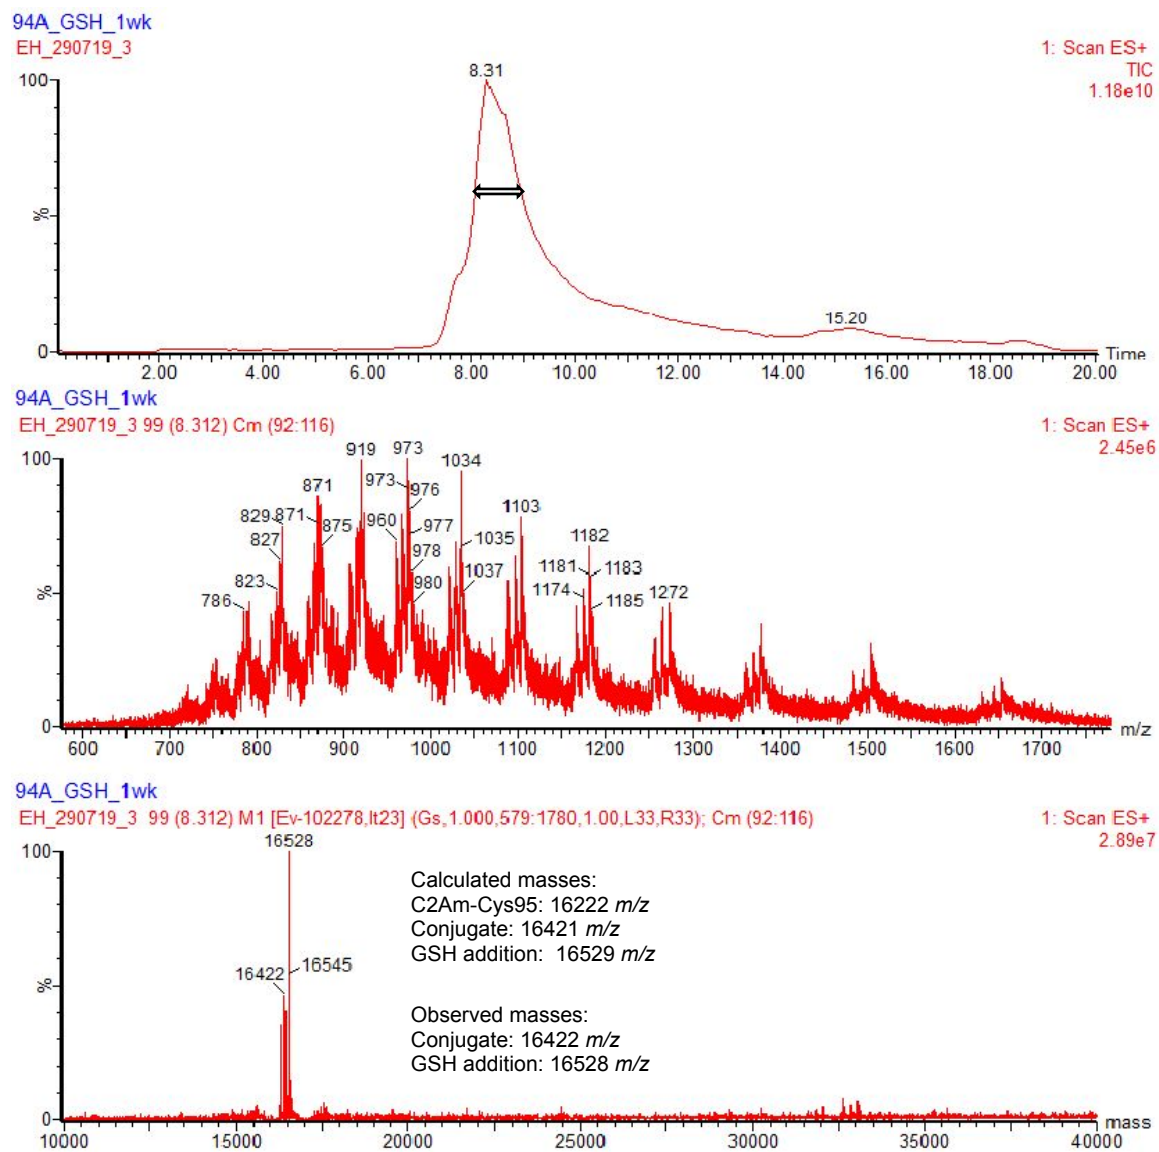

**Figure S20.** ESI-MS of C2Am-5e conjugate (O-Cys) after 1 week at 37 °C in the presence of 1 mM GSH.

## Stability of C2Am-5e/11 conjugates in human plasma

To 18  $\mu$ L of each C2Am-5e/11 conjugate (20  $\mu$ M, 360 pmol), 2  $\mu$ L of reconstituted human plasma (*Sigma Aldrich*) was added. Each mixture was vortexed and left to shake at 37  $^{\circ}$ C. Time points were taken at 24 h and 1 week. Evaluation of the stability of the conjugates was accomplished by LC-MS analysis of 10  $\mu$ L aliquots from each time point. Both conjugates are still present even after a 1 week incubation period with no signs of significant degradation.

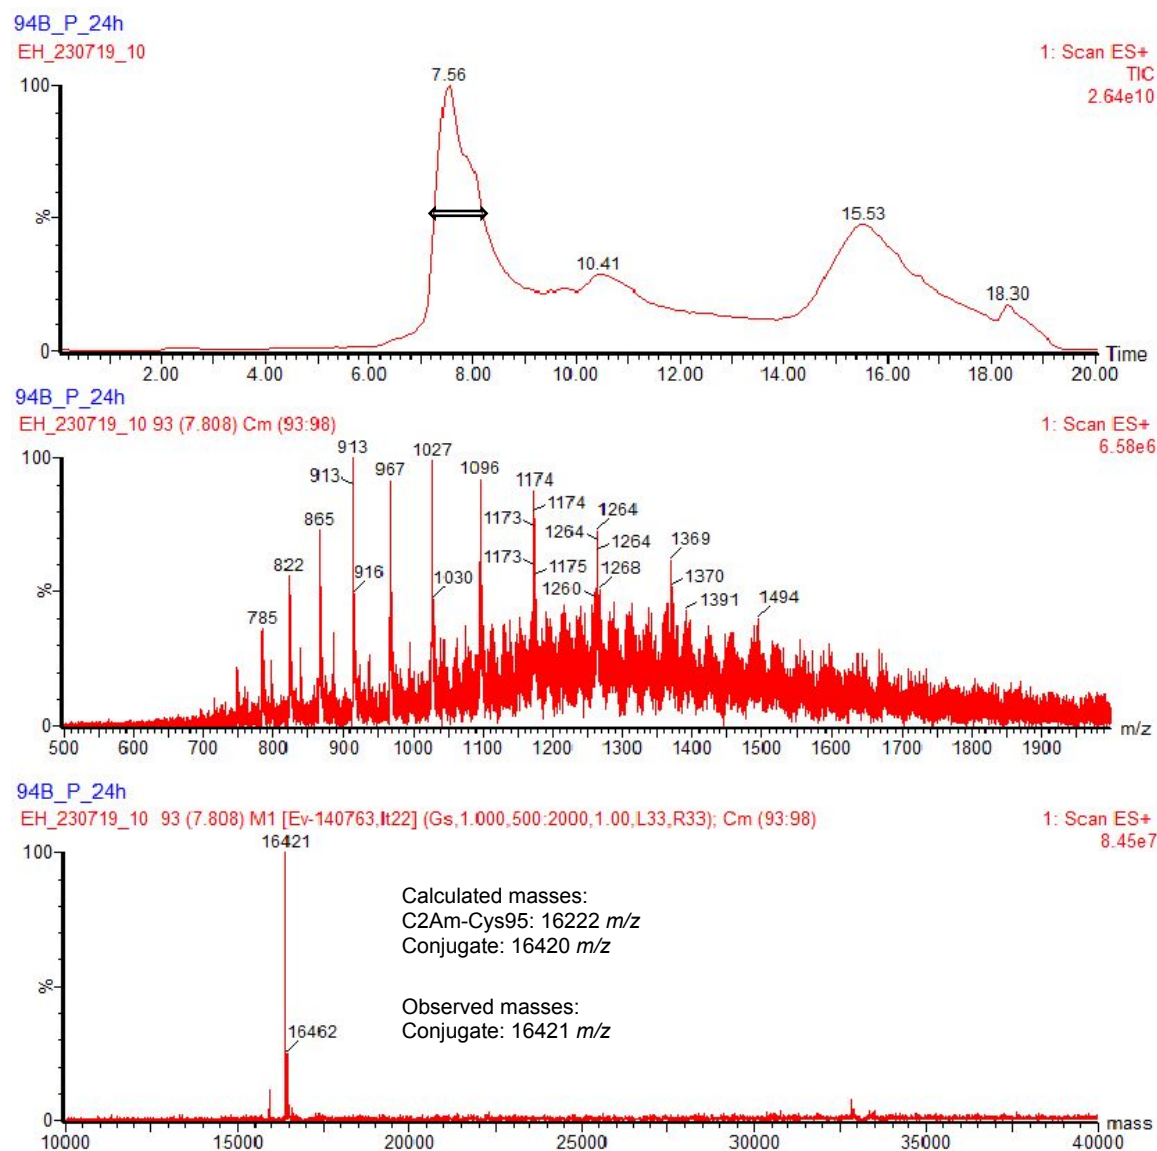

**Figure S21.** ESI-MS of C2Am-11 conjugate (N-Cys) after 24 h at 37  $^{\circ}$ C in the presence of human plasma.

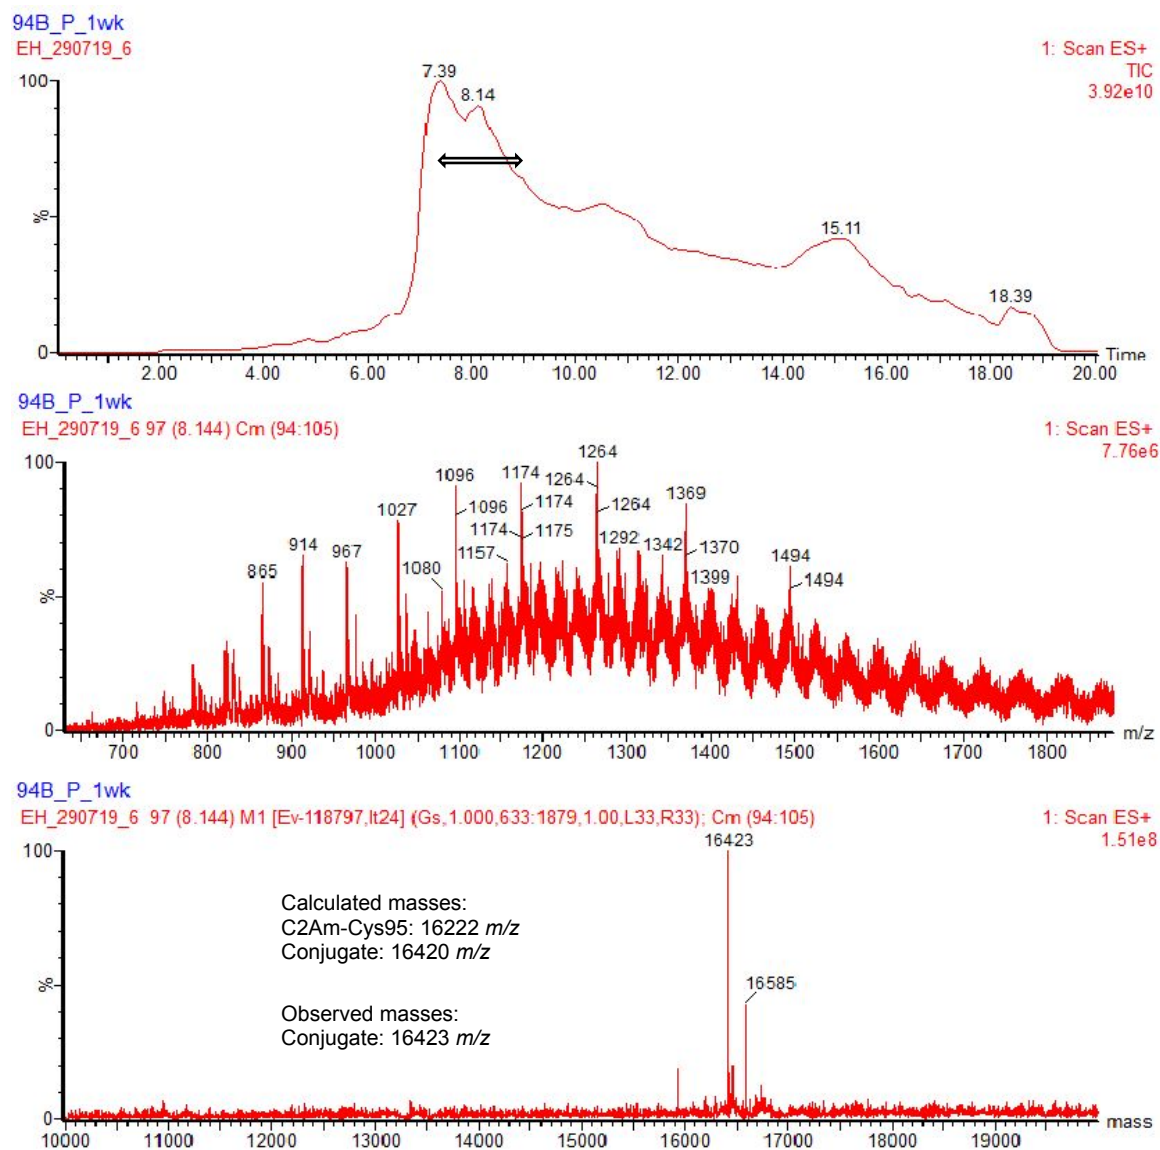

**Figure S22.** ESI-MS of C2Am-11 conjugate (N-Cys) after 1 week at 37 °C in the presence of human plasma.

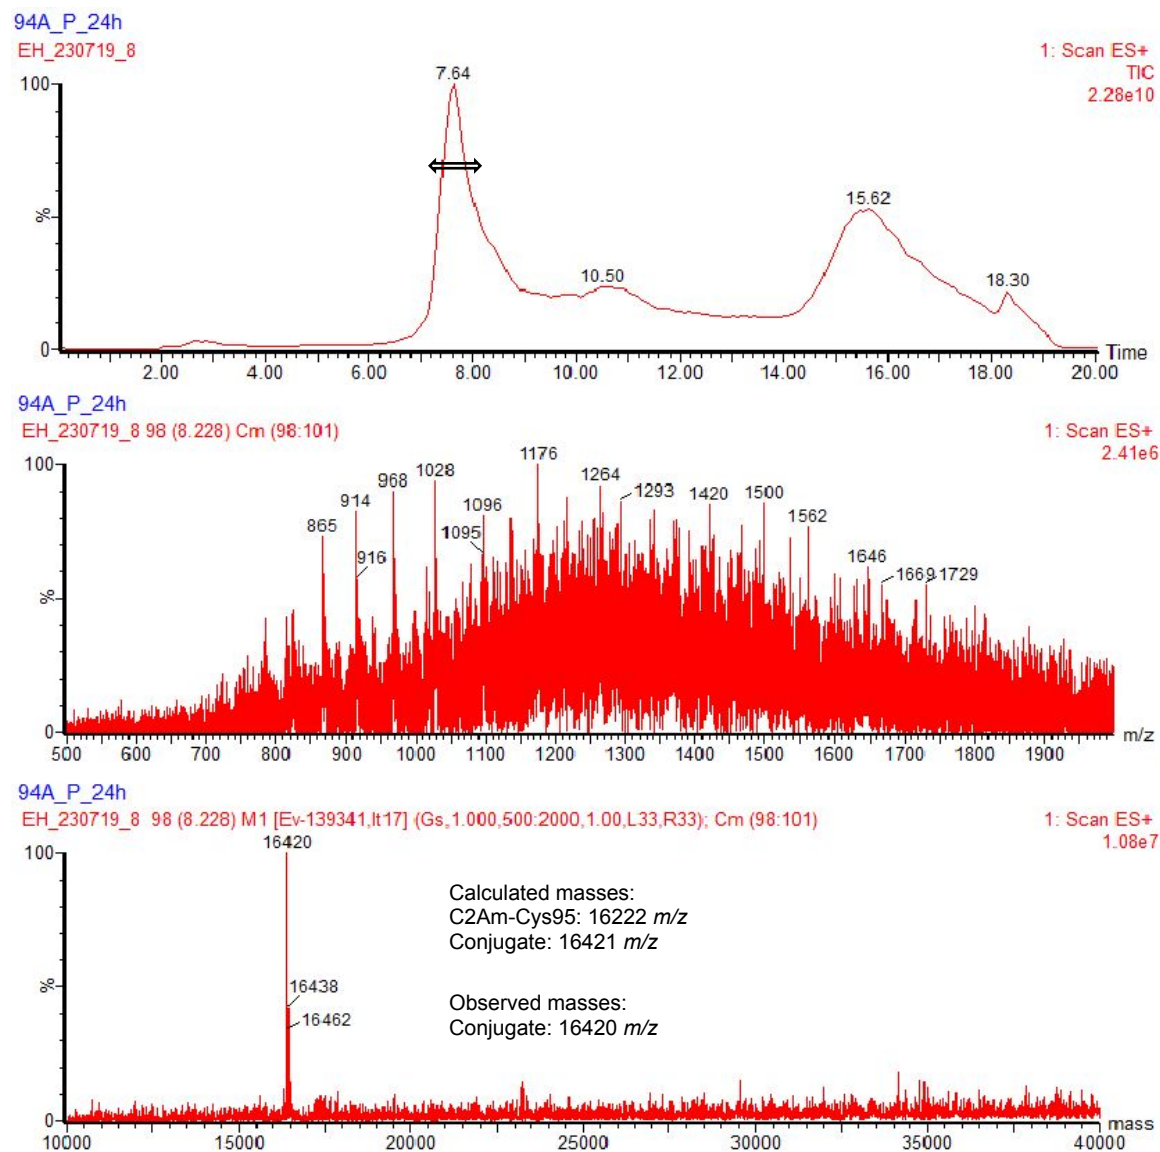

**Figure S23.** ESI-MS of C2Am-5e conjugate (O-Cys) after 24 h at 37 °C in the presence of human plasma.



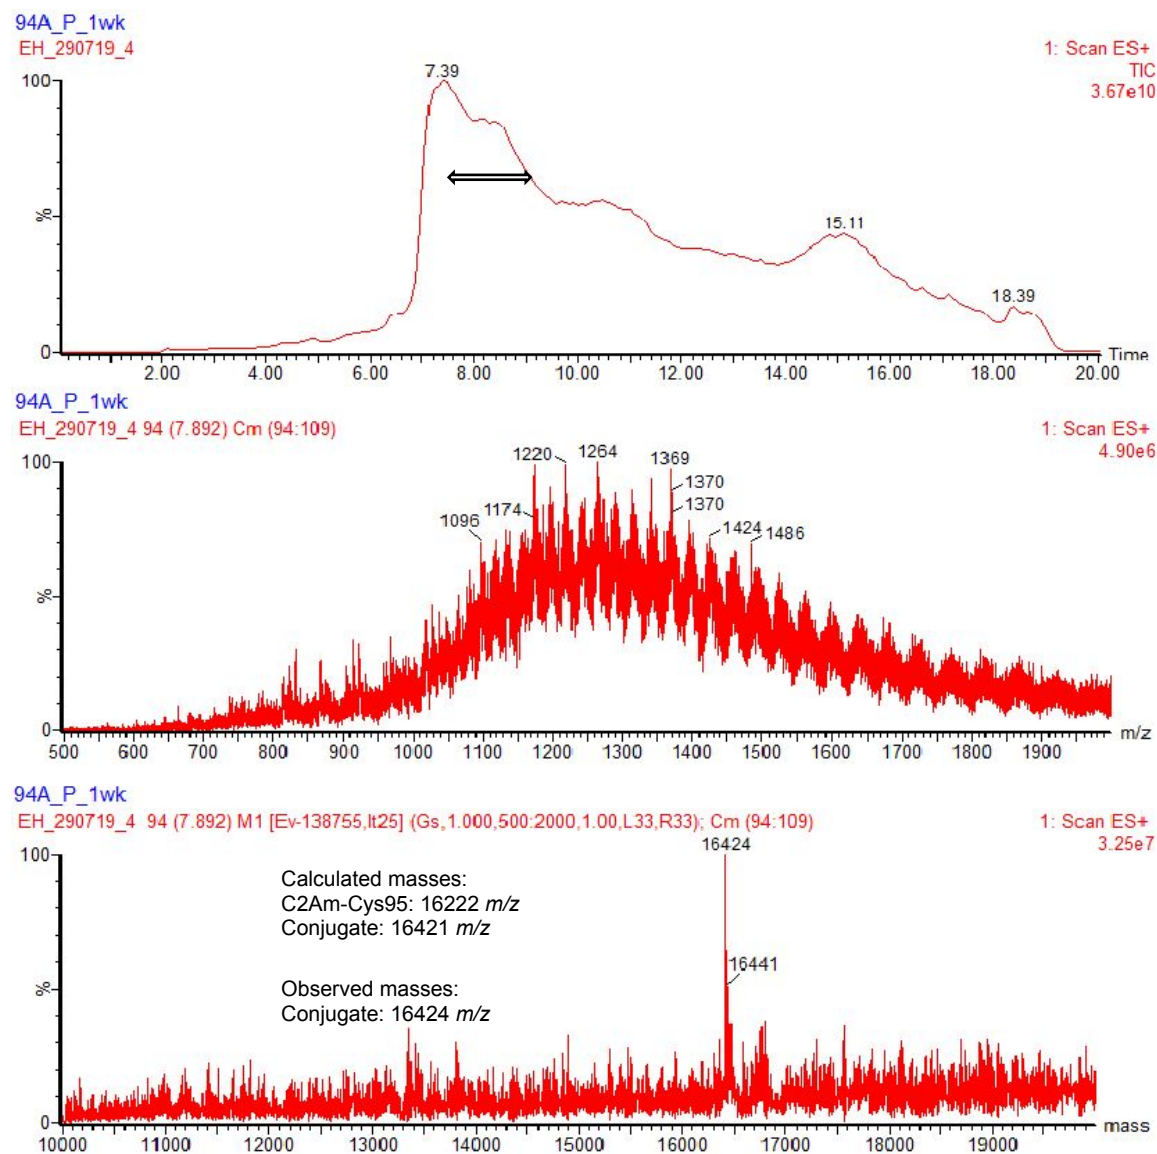

**Figure S24.** ESI-MS of C2Am-5e conjugate (O-Cys) after 1 week at 37 °C in the presence of human plasma.

### LC-MS/MS analysis of C2Am-Cys95 conjugates

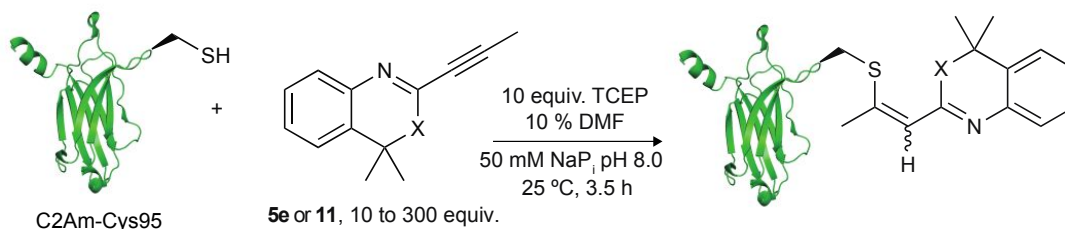

Protein solutions were subjected to enzymatic digestion in 50 mM ammonium bicarbonate (pH 8) with trypsin overnight at 37°C. After digestion, the supernatant was pipetted into a sample vial and loaded onto an autosampler for automated LC-MS/MS analysis.

All LC-MS/MS experiments were performed using a Dionex Ultimate 3000 RSLC nanoUPLC (Thermo Fisher Scientific Inc, Waltham, MA, USA) system and a QExactive Orbitrap mass spectrometer (Thermo Fisher Scientific Inc, Waltham, MA, USA). Separation of peptides was performed by reverse-phase chromatography at a flow rate of 300 nL/min and a Thermo Scientific reverse-phase nano Easy-spray column (Thermo Scientific PepMap C18, 2µm particle size, 100Å pore size, 75 µm i.d. x 50cm length). Peptides were loaded onto a pre-column (Thermo Scientific PepMap 100 C18, 5µm particle size, 100Å pore size, 300 µm i.d. x 5mm length) from the Ultimate 3000 autosampler with 0.1% formic acid for 3 minutes at a flow rate of 10 µL/min. After this period, the column valve was switched to allow elution of peptides from the pre-column onto the analytical column. Solvent A was water + 0.1% formic acid and solvent B was 80% acetonitrile, 20% water + 0.1% formic acid. The linear gradient employed was 2-40% B in 30 minutes.

The LC eluant was sprayed into the mass spectrometer by means of an Easy-Spray source (Thermo Fisher Scientific Inc.). All  $m/z$  values of eluting ions were measured in an Orbitrap mass analyzer, set at a resolution of 70000 and was scanned between  $m/z$  380-1500. Data dependent scans (Top 20) were employed to automatically isolate and generate fragment ions by higher energy collisional dissociation (HCD, NCE:25%) in the HCD collision cell and measurement of the resulting fragment ions was performed in the Orbitrap analyser, set at a resolution of 17500. Singly charged ions and ions with unassigned charge states were excluded from being selected for MS/MS and a dynamic exclusion window of 20 seconds was employed.

Post-run, the data was processed using Protein Discoverer (version 2.1., Thermo Scientific). Briefly, all MS/MS data were converted to mgf files and the files were then submitted to the Mascot search algorithm (Matrix Science, London UK) and searched against a custom database containing the Synaptotagmin sequence and a common contaminant sequences (123 sequences; 40594 residues). Variable modifications of oxidation (M), deamidation (NQ), OCCL (C) and NCCL (C) were applied. The peptide and fragment mass tolerances were set to 100 ppm and 0.1 Da, respectively. A significance threshold value of  $p < 0.05$  and a peptide cut-off score of 20 were also applied.





## Anti-HER2 2Rb17c nanobody Studies

anti-HER2 2Rb17c nanobody (obtained from collaborator)<sup>12</sup>

### Sequence:

EVQLQESGGGLVQPGGSLRLSCAASGFISSNDAMTWVRQAPGKGLEWVSSINWSGT

HTNYADSVKGRFTISRDNARTLYLQMNSLKDEDTALYYCVTGYGVTKTPTGQGT QVTVSSHHHHHHSPSTPPTPSPSTPPC

Calculated  $M_w$  = 14861.46 Da

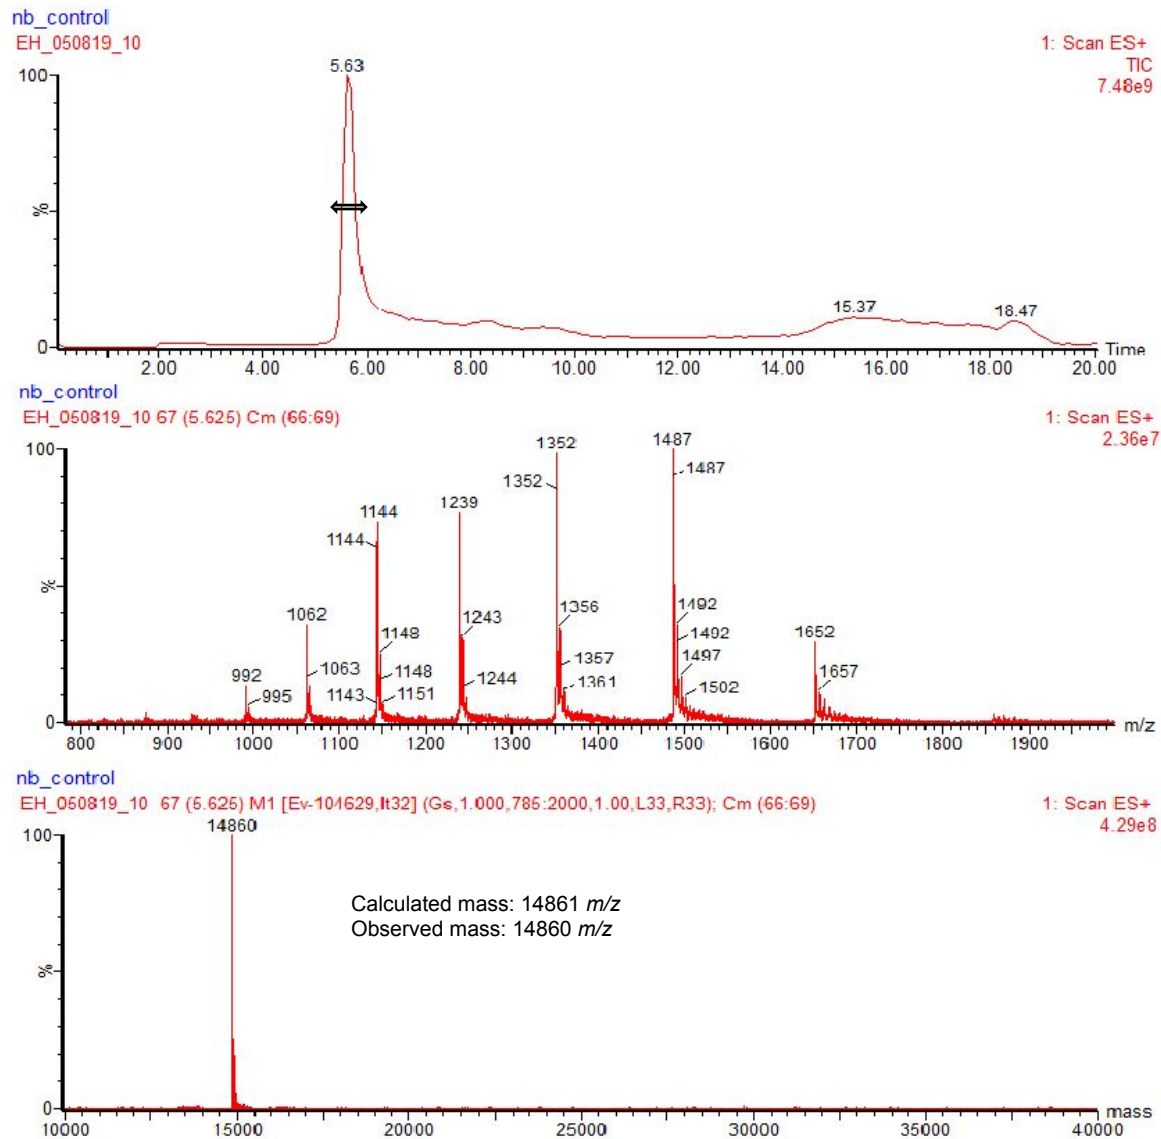

**Figure S25.** ESI-MS of anti-HER2 2Rb17c control in the presence of TCEP.

### anti-HER2 2Rb17c reaction with **11**

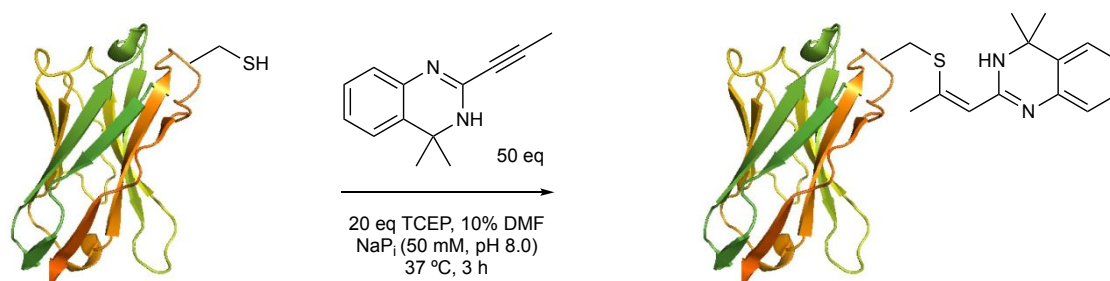

In a 12.5  $\mu\text{L}$  total reaction volume, anti-HER2 2Rb17c (2.35  $\mu\text{L}$  at 53  $\mu\text{M}$  in 50 mM NaPi pH 8 buffer, 125 pmol, 10  $\mu\text{M}$  final concentration), **11** (0.5  $\mu\text{L}$  at 12.6 mM in DMF, 6.25 nmol, 500  $\mu\text{M}$  final concentration), and TCEP (1  $\mu\text{L}$  at 2.5 mM in water, 2.50 nmol, 200  $\mu\text{M}$  final concentration) were added to DMF/NaPi (0.5  $\mu\text{L}$  DMF in 8.15  $\mu\text{L}$  50 mM NaPi pH 8 buffer) and vortexed for 30 seconds. Samples of 10  $\mu\text{L}$  were taken from the reaction mixture for LC-MS analysis. Full conversion was observed after 3 h at 37 °C (calculated mass: 15059  $m/z$ ; observed mass: 15064  $m/z$ ).\*

\*(M+41)<sup>+</sup> peaks for the products were observed, where the additional 41 Da is contributed from the acetonitrile in the mobile phase.

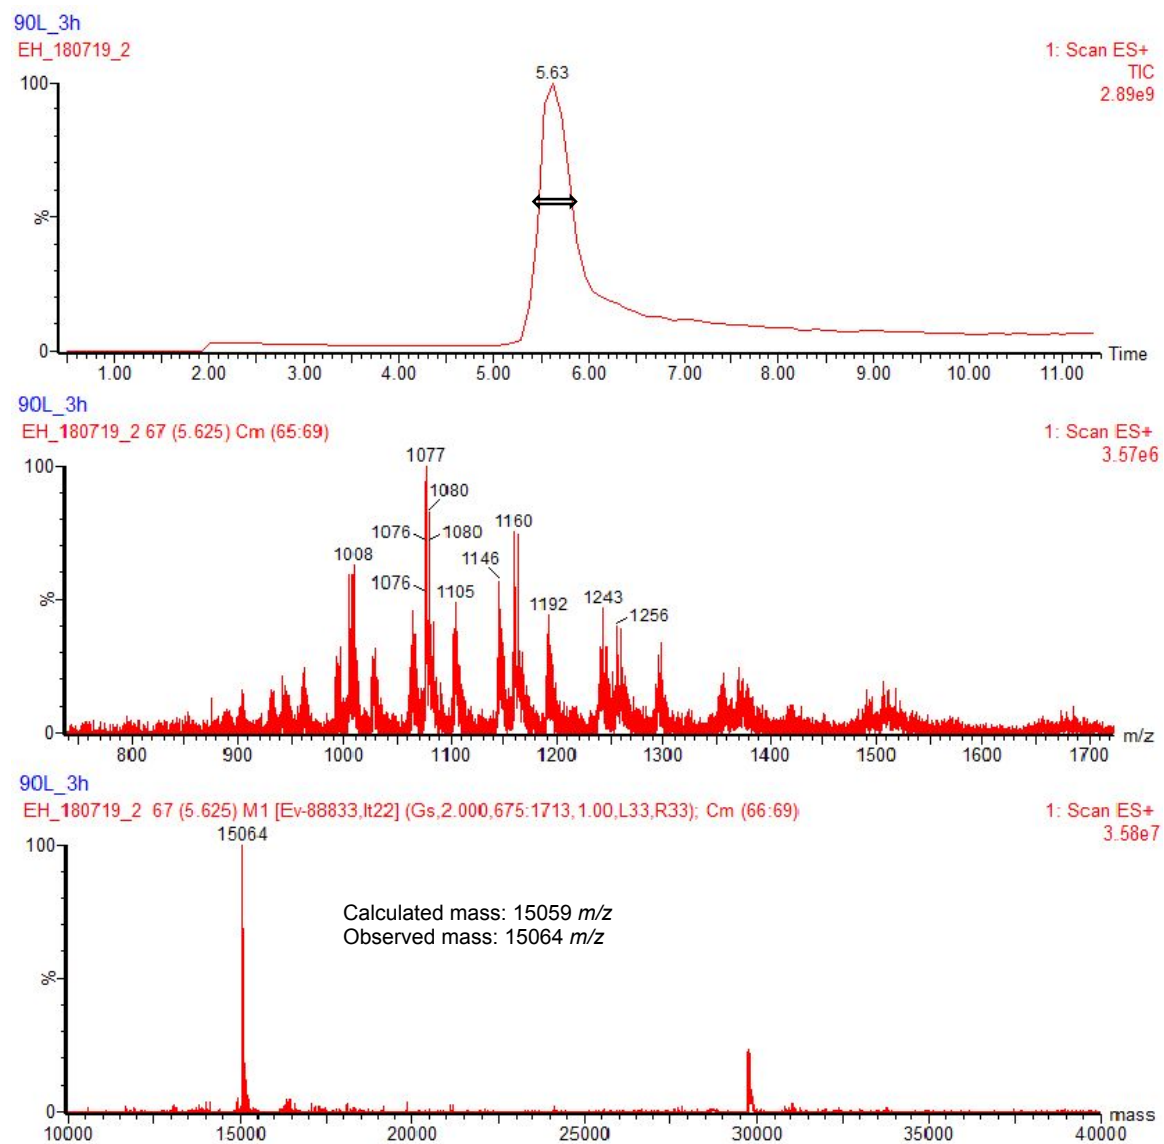

**Figure S26.** ESI-MS of the reaction of anti-HER2 2Rb17c with **11** (50 eq) after being shaken for 3 h at 37 °C.

### anti-HER2 2b17c reaction with 5e

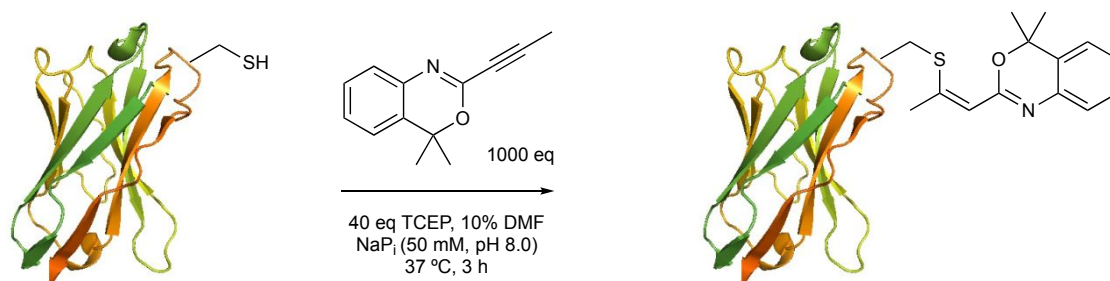

In a 12.5  $\mu\text{L}$  total reaction volume, anti-HER2 2Rb17c (2.35  $\mu\text{L}$  at 53  $\mu\text{M}$  in 50 mM NaPi pH 8 buffer, 125 pmol, 10  $\mu\text{M}$  final concentration), **5e** (1  $\mu\text{L}$  at 125 mM in DMF, 125 nmol, 10 mM final concentration), and TCEP (2  $\mu\text{L}$  at 2.5 mM in water, 2.50 nmol, 400  $\mu\text{M}$  final concentration) were added to NaPi (7.15  $\mu\text{L}$  50 mM NaPi pH 8 buffer) and vortexed for 30 seconds. Samples of 10  $\mu\text{L}$  were taken from the reaction mixture for LC-MS analysis. Approximately 40% conversion was observed after 3 h at 37 °C (calculated mass: 15060  $m/z$ ; observed mass: 15061  $m/z$ ).\*

\*(M+41)<sup>+</sup> peaks for the products were observed, where the additional 41 Da is contributed from the acetonitrile in the mobile phase.

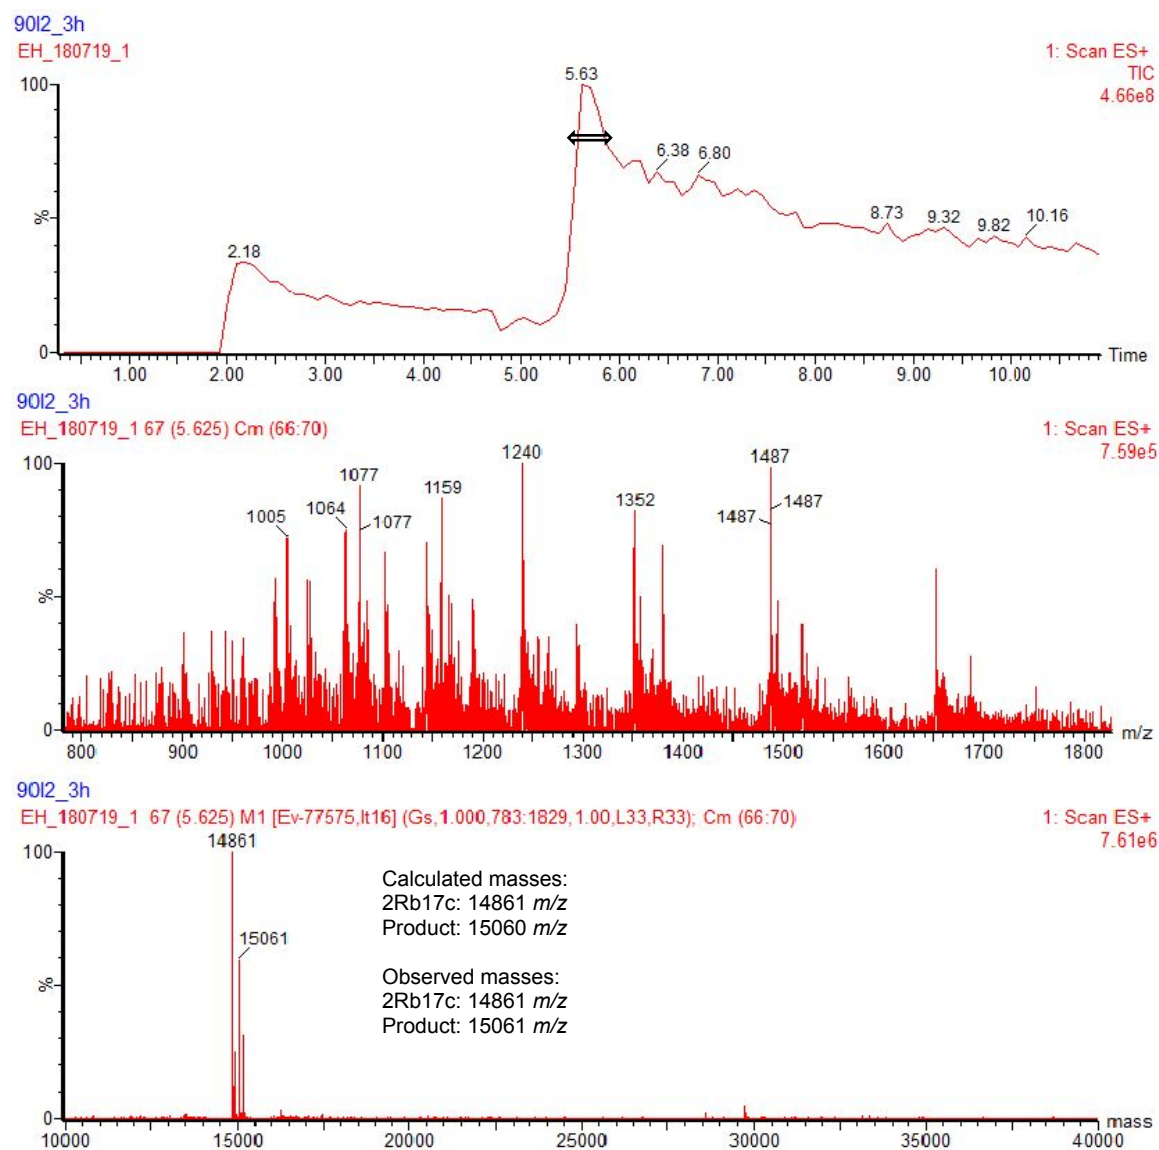

**Figure S27.** ESI-MS of the reaction of anti-HER2 2Rb17c with **5e** (1000 eq) after being shaken for 3 h at 37 °C.

**Table S3.** Conditions and conversions for C2Am-Cys95 conjugation with **5e**<sup>a</sup>

| <b>5e</b> concentration (μM) | C2Am-Cys95 concentration (μM) | Temperature (°C) | DMF (%) | Time (h) | Conversion (%)   |
|------------------------------|-------------------------------|------------------|---------|----------|------------------|
| 821 (82 eq)                  | 10                            | 25               | 10      | 3        | 42               |
| 3000 (300 eq)                | 10                            | 25               | 10      | 3.5      | >95 <sup>b</sup> |
| 8210 (821 eq)                | 10                            | 25               | 10      | 3        | >95 <sup>b</sup> |

<sup>a</sup> All reactions performed in 50 mM NaP<sub>i</sub> pH 8.0

<sup>b</sup> No starting material detected

**Table S4.** Conditions and conversions for C2Am-Cys95 conjugation with **11**<sup>a</sup>

| <b>11</b> concentration (μM) | C2Am-Cys95 concentration (μM) | Temperature (°C) | DMF (%) | Time (h) | Conversion (%)   |
|------------------------------|-------------------------------|------------------|---------|----------|------------------|
| 10 (1 eq)                    | 10                            | 25               | 10      | 3        | 70               |
| 100 (10 eq)                  | 10                            | 25               | 10      | 3.5      | 88               |
| 821 (82 eq)                  | 10                            | 25               | 10      | 1        | >95 <sup>b</sup> |

<sup>a</sup> All reactions performed in 50 mM NaP<sub>i</sub> pH 8.0

<sup>b</sup> No starting material detected

**Table S5.** Conditions and conversions for anti-HER2 2Rb17c conjugation with **5e**<sup>a</sup>

| <b>5e</b> concentration (μM) | 2Rb17c concentration (μM) | Temperature (°C) | DMF (%) | Time (h) | Conversion (%)                  |
|------------------------------|---------------------------|------------------|---------|----------|---------------------------------|
| 1000 (100 eq)                | 10                        | 37               | 10      | 3        | 0                               |
| 10,000 (1000 eq)             | 10                        | 37               | 10      | 3        | 43                              |
| 20,000 (2000 eq)             | 10                        | 37               | 10      | 5        | no signal detected <sup>b</sup> |

<sup>a</sup> All reactions performed in 50 mM NaP<sub>i</sub> pH 8.0

<sup>b</sup> No protein detected most likely due to precipitation from high small molecule concentration

**Table S6.** Conditions and conversions for anti-HER2 2Rb17c conjugation with **11**<sup>a</sup>

| <b>11</b> concentration (μM) | 2Rb17c concentration (μM) | Temperature (°C) | DMF (%) | Time (h) | Conversion (%)   |
|------------------------------|---------------------------|------------------|---------|----------|------------------|
| 100 (10 eq)                  | 10                        | 37               | 10      | 3        | 0                |
| 500 (50 eq)                  | 10                        | 37               | 10      | 3        | >95 <sup>b</sup> |
| 1000 (100 eq)                | 10                        | 37               | 10      | 3        | >95 <sup>b</sup> |
| 2500 (250 eq)                | 10                        | 37               | 10      | 5        | >95 <sup>b</sup> |
| 5000 (500 eq)                | 10                        | 37               | 10      | 5        | >95 <sup>b</sup> |

<sup>a</sup> All reactions performed in 50 mM NaP<sub>i</sub> pH 8.0

<sup>b</sup> No starting material detected

## Kinase Panel Data

Biochemical potency data for all compounds were obtained at Thermo Fisher Scientific.

Selectivity of inhibitors **16-18** and **26** in a panel of either 140 or 403 human kinases run in the SelectScreen kinase panel at ThermoFisher Scientific at a single concentration of 1  $\mu$ M.

### Data for compound 16

| Kinase Name      | Activity flag | Mean Inhibition (%) |
|------------------|---------------|---------------------|
| AAK1             | Active        | 97.3194             |
| ABL1             | Not Active    | 55.4901             |
| ABL2             | Not Active    | 61.8084             |
| ACVR1B           | Not Active    | -0.4109             |
| AKT1             | Not Active    | 2.8379              |
| AKT2             | Not Active    | 14.8043             |
| ALK              | Not Active    | 24.2618             |
| AMPK A2/B1/G1    | Not Active    | 21.8734             |
| ARK5             | Active        | 98.672              |
| AurKB            | Not Active    | 69.0011             |
| AurKC            | Not Active    | 43.6611             |
| AXL              | Not Active    | 32.944              |
| BLK              | Not Active    | 65.2312             |
| BMX              | Active        | 92.5245             |
| bRAF             | Not Active    | -2.4128             |
| BTK              | Active        | 79.4305             |
| CaMK1            | Not Active    | -4.9366             |
| CAMK2b           | Not Active    | 0.7558              |
| CDK1:CB          | Not Active    | 31.3551             |
| CDK2:CA          | Not Active    | 48.9856             |
| CDK2:CE          | Not Active    | 43.174              |
| CDK7:Cyc H:MNAT1 | Not Active    | 1.476               |
| CDK8:CC          | Not Active    | 16.5822             |
| CDK9:CT          | Active        | 84.1833             |
| CHK1             | Not Active    | 15.2969             |

|         |            |         |
|---------|------------|---------|
| cKIT    | Not Active | 12.4703 |
| CLK1    | Not Active | 13.6522 |
| CLK2    | Not Active | 72.7672 |
| CLK3    | Not Active | 9.4084  |
| CLK4    | Active     | 79.7832 |
| cRAF    | Not Active | 19.2453 |
| CSF1R   | Not Active | 28.589  |
| CSNK1g1 | Not Active | 3.9237  |
| CSNK2a2 | Not Active | 19.8022 |
| DDR2    | Not Active | 6.3062  |
| DMPK    | Not Active | 52.2254 |
| DNA-PK  | Not Active | 5.381   |
| DYRK2   | Active     | 76.3399 |
| EEF2K   | Not Active | 3.5692  |
| EGFR    | Not Active | 55.8212 |
| EGFR    | Active     | 86.2323 |
| EPHA5   | Not Active | 15.4978 |
| EPHB1   | Not Active | 9.3567  |
| EphB4   | Not Active | 6.3578  |
| ERBB2   | Not Active | 16.5016 |
| ERBB4   | Not Active | 37.3806 |
| FER     | Not Active | 34.105  |
| FES     | Not Active | 12.5113 |
| FGFR1   | Not Active | 45.0486 |
| FGFR1   | Not Active | 16.7172 |
| FGFR2   | Not Active | 17.3222 |
| FGFR3   | Not Active | 22.2816 |
| FGFR4   | Not Active | -0.7964 |
| FLT1    | Not Active | 14.964  |
| FLT3    | Not Active | 72.9354 |
| FRAP1   | Not Active | -4.5895 |
| FYN     | Not Active | 27.2795 |
| GSG2    | Not Active | 46.2486 |
| GSK3A   | Not Active | 67.6405 |
| GSK3b   | Active     | 82.1826 |



|           |            |          |
|-----------|------------|----------|
| IGF1R     | Not Active | -0.2694  |
| IKKb      | Not Active | 13.2408  |
| INSR      | Not Active | 1.1105   |
| INSRR     | Not Active | 7.1835   |
| IRAK1     | Not Active | 73.8139  |
| IRAK4     | Not Active | 31.9774  |
| JAK1      | Not Active | 44.5239  |
| JAK2      | Active     | 84.1656  |
| JAK3      | Active     | 101.1731 |
| JNK1      | Not Active | 10.7556  |
| KDR       | Not Active | 49.4142  |
| LCK       | Not Active | 25.4086  |
| LRRK2     | Active     | 91.6952  |
| LYN       | Not Active | 28.4673  |
| MAP2K1    | Not Active | 5.8667   |
| MAP3K7    | Active     | 81.8058  |
| MAP3K9    | Active     | 97.8003  |
| MAP4K1    | Not Active | 49.9383  |
| MAP4K3    | Not Active | 31.932   |
| MAPK1     | Not Active | 0.3303   |
| MAPKAPK1A | Not Active | 37.8916  |
| MAPKAPK2  | Not Active | 3.5673   |
| MAPKAPK5  | Not Active | 4.1439   |
| MARK1     | Not Active | 23.2688  |
| MARK2     | Not Active | 20.7635  |
| MERTK     | Not Active | 19.7312  |
| MINK      | Active     | 79.2568  |
| MKNK2     | Active     | 84.2912  |
| MSK1      | Not Active | 28.4299  |
| MST1R     | Not Active | 21.502   |
| MTK       | Not Active | 18.9717  |
| MYLK      | Not Active | 12.5146  |
| NEK2      | Not Active | -10.8264 |
| NTRK3     | Not Active | 65.4542  |
| p38a      | Not Active | 2.9828   |

|               |            |         |
|---------------|------------|---------|
| P70S6K        | Not Active | 7.5888  |
| PAK1          | Not Active | 18.1142 |
| PAK2          | Not Active | 8.1648  |
| PAK4          | Not Active | 22.2334 |
| PAK5          | Not Active | 6.8192  |
| PDGFRb        | Not Active | 16.8232 |
| PDPK1         | Not Active | 3.9148  |
| PEAK1         | Not Active | 20.2232 |
| PI3Kb         | Not Active | 3.4828  |
| PI3Kd         | Not Active | 10.4414 |
| PI3Kg         | Not Active | 18.2942 |
| PI4KB         | Not Active | 69.9506 |
| PIK3C2A       | Not Active | 7.8273  |
| PIK3C3        | Not Active | 15.7651 |
| PIK3CA:PIK3R1 | Not Active | -8.3958 |
| PIM2          | Not Active | -0.6285 |
| PKAa          | Not Active | 14.1084 |
| PKCa          | Not Active | 43.6714 |
| PKCe          | Not Active | -7.9948 |
| PKCt          | Not Active | 3.4876  |
| PKG1          | Not Active | 2.7441  |
| PLK1          | Not Active | 10.9429 |
| PTK2          | Not Active | 28.6148 |
| PTK6          | Not Active | 30.4769 |
| RET           | Not Active | 33.607  |
| RET           | Not Active | 32.832  |
| RET           | Not Active | 31.4308 |
| ROCK1         | Not Active | 15.8794 |
| ROCK2         | Not Active | 4.1072  |
| ROS1          | Active     | 75.3877 |
| SGK1          | Not Active | 40.3694 |
| src           | Not Active | 26.4837 |
| SRPK1         | Not Active | 3.0984  |
| STK17A        | Active     | 79.099  |
| STK4          | Not Active | 30.1121 |

|        |            |         |
|--------|------------|---------|
| SYK    | Active     | 83.3916 |
| TBK1   | Not Active | 40.9645 |
| TGFBR1 | Not Active | 25.5106 |
| TNIK   | Active     | 78.7459 |
| TRKA   | Not Active | 53.7019 |
| TRKB   | Not Active | 44.8247 |
| TYRO3  | Not Active | 38.5508 |
| ULK2   | Not Active | 9.791   |
| YES    | Not Active | 36.5108 |
| ZAP70  | Not Active | 11.8636 |

#### Data for compound 17

| Kinase Name   | Activity flag | Mean Inhibition (%) |
|---------------|---------------|---------------------|
| AAK1          | Active        | 92.5646             |
| ABL1          | Not Active    | 55.5999             |
| ABL2          | Not Active    | 60.1362             |
| ACVR1B        | Not Active    | -4.0594             |
| AKT1          | Not Active    | -1.654              |
| AKT2          | Not Active    | 9.493               |
| ALK           | Not Active    | 29.1124             |
| AMPK A2/B1/G1 | Not Active    | 15.374              |
| ARK5          | Active        | 95.4684             |
| AurKB         | Not Active    | 57.2626             |
| AurKC         | Not Active    | 26.7352             |
| AXL           | Not Active    | 30.0518             |
| BLK           | Not Active    | 26.5546             |
| BMX           | Not Active    | 53.9974             |
| bRAF          | Not Active    | -3.4797             |
| BTK           | Not Active    | 27.285              |
| CaMK1         | Not Active    | 2.7998              |
| CAMK2b        | Not Active    | -1.6204             |
| CDK1:CB       | Not Active    | 41.8964             |
| CDK2:CA       | Not Active    | 57.7548             |
| CDK2:CE       | Not Active    | 39.0004             |

|                  |            |         |
|------------------|------------|---------|
| CDK7:Cyc H:MNAT1 | Not Active | -1.2371 |
| CDK8:CC          | Not Active | 6.8319  |
| CDK9:CT          | Active     | 89.9563 |
| CHK1             | Not Active | 6.7222  |
| cKIT             | Not Active | 19.9857 |
| CLK1             | Not Active | 25.379  |
| CLK2             | Not Active | 51.9707 |
| CLK3             | Not Active | 8.0609  |
| CLK4             | Active     | 86.4901 |
| cRAF             | Not Active | 25.765  |
| CSF1R            | Not Active | 36.8656 |
| CSNK1g1          | Not Active | 0.9319  |
| CSNK2a2          | Not Active | 23.4159 |
| DDR2             | Not Active | 4.8183  |
| DMPK             | Not Active | 25.0816 |
| DNA-PK           | Not Active | 6.631   |
| DYRK2            | Not Active | 69.5576 |
| EEF2K            | Not Active | 7.4156  |
| EGFR             | Active     | 83.5024 |
| EGFR             | Not Active | 40.0748 |
| EPHA5            | Not Active | 13.0144 |
| EPHB1            | Not Active | 10.5602 |
| EphB4            | Not Active | 8.8425  |
| ERBB2            | Not Active | -0.0832 |
| ERBB4            | Not Active | 13.1762 |
| FER              | Not Active | 35.4818 |
| FES              | Not Active | 17.8417 |
| FGFR1            | Not Active | -0.6718 |
| FGFR1            | Not Active | 16.4125 |
| FGFR2            | Not Active | 16.5932 |
| FGFR3            | Not Active | 13.6832 |
| FGFR4            | Not Active | -3.5054 |
| FLT1             | Not Active | 15.7129 |
| FLT3             | Active     | 76.175  |
| FRAP1            | Not Active | 3.1522  |

|           |            |          |
|-----------|------------|----------|
| FYN       | Not Active | 22.9266  |
| GSG2      | Not Active | 42.7077  |
| GSK3A     | Not Active | 61.5468  |
| GSK3b     | Active     | 77.1159  |
| IGF1R     | Not Active | 7.2208   |
| IKKb      | Not Active | 8.7254   |
| INSR      | Not Active | 3.1558   |
| INSRR     | Not Active | 5.6726   |
| IRAK1     | Active     | 76.276   |
| IRAK4     | Not Active | 42.1748  |
| JAK1      | Not Active | 32.2331  |
| JAK2      | Active     | 75.1496  |
| JAK3      | Active     | 76.4822  |
| JNK1      | Not Active | 1.3049   |
| KDR       | Not Active | 51.2813  |
| LCK       | Not Active | 12.1115  |
| LRRK2     | Active     | 91.0334  |
| LYN       | Not Active | 30.7276  |
| MAP2K1    | Not Active | 7.6752   |
| MAP3K7    | Active     | 102.5824 |
| MAP3K9    | Active     | 110.1385 |
| MAP4K1    | Not Active | 43.0356  |
| MAP4K3    | Not Active | 29.4958  |
| MAPK1     | Not Active | 2.3322   |
| MAPKAPK1A | Not Active | 41.3406  |
| MAPKAPK2  | Not Active | 1.5246   |
| MAPKAPK5  | Not Active | 2.2264   |
| MARK1     | Not Active | 12.3413  |
| MARK2     | Not Active | 7.9452   |
| MERTK     | Not Active | 20.8866  |
| MINK      | Active     | 90.2628  |
| MKNK2     | Active     | 83.8075  |
| MSK1      | Not Active | 17.404   |
| MST1R     | Not Active | 18.8754  |
| MTK       | Not Active | 11.8924  |

|               |            |         |
|---------------|------------|---------|
| MYLK          | Not Active | 12.5824 |
| NEK2          | Not Active | -8.8048 |
| NTRK3         | Not Active | 57.3368 |
| p38a          | Not Active | 17.6671 |
| P70S6K        | Not Active | 5.5026  |
| PAK1          | Not Active | 12.0348 |
| PAK2          | Not Active | 6.973   |
| PAK4          | Not Active | 23.5696 |
| PAK5          | Not Active | 6.8616  |
| PDGFRb        | Not Active | 27.6824 |
| PDPK1         | Not Active | 3.2782  |
| PEAK1         | Not Active | 14.7216 |
| PI3Kb         | Not Active | -3.895  |
| PI3Kd         | Not Active | 18.3563 |
| PI3Kg         | Not Active | -0.3296 |
| PI4KB         | Active     | 75.8411 |
| PIK3C2A       | Not Active | 10.8018 |
| PIK3C3        | Not Active | 8.4867  |
| PIK3CA:PIK3R1 | Not Active | 17.7506 |
| PIM2          | Not Active | 2.3057  |
| PKAa          | Not Active | 7.4092  |
| PKCa          | Not Active | 32.2446 |
| PKCe          | Not Active | -0.3923 |
| PKCt          | Not Active | 7.095   |
| PKG1          | Not Active | 6.651   |
| PLK1          | Not Active | 10.7478 |
| PTK2          | Not Active | 29.4016 |
| PTK6          | Not Active | 32.7568 |
| RET           | Not Active | 28.6842 |
| RET           | Not Active | 25.2797 |
| RET           | Not Active | 26.231  |
| ROCK1         | Not Active | 7.2227  |
| ROCK2         | Not Active | -0.769  |
| ROS1          | Active     | 78.3821 |
| SGK1          | Not Active | 42.4808 |

|        |            |         |
|--------|------------|---------|
| src    | Not Active | 33.6438 |
| SRPK1  | Not Active | 1.8463  |
| STK17A | Not Active | 68.7291 |
| STK4   | Not Active | 26.472  |
| SYK    | Active     | 84.3698 |
| TBK1   | Not Active | 44.0277 |
| TGFBR1 | Not Active | 11.6408 |
| TNIK   | Active     | 87.5815 |
| TRKA   | Not Active | 47.9755 |
| TRKB   | Not Active | 25.4362 |
| TYRO3  | Not Active | 47.6342 |
| ULK2   | Not Active | 4.6198  |
| YES    | Not Active | 37.0873 |
| ZAP70  | Not Active | 11.5708 |

#### Data for compound 18

| Kinase Name   | Activity flag | Mean Inhibition (%) |
|---------------|---------------|---------------------|
| AAK1          | Active        | 80.3862             |
| ABL1          | Not Active    | 7.1614              |
| ABL2          | Not Active    | -7.0958             |
| ACVR1B        | Not Active    | 1.3127              |
| AKT1          | Not Active    | 4.1862              |
| AKT2          | Not Active    | 0.0474              |
| ALK           | Not Active    | 2.6958              |
| AMPK A2/B1/G1 | Not Active    | 2.9746              |
| ARK5          | Not Active    | 50.6194             |
| AurKB         | Not Active    | 5.4825              |
| AurKC         | Not Active    | 1.1874              |
| AXL           | Not Active    | 2.1918              |
| BLK           | Not Active    | 13.4886             |
| BMX           | Not Active    | 70.7044             |
| bRAF          | Not Active    | -8.6975             |
| BTK           | Not Active    | 39.3948             |
| CaMK1         | Not Active    | -15.5873            |

|                  |            |          |
|------------------|------------|----------|
| CAMK2b           | Not Active | 5.848    |
| CDK1:CB          | Not Active | 11.8725  |
| CDK2:CA          | Not Active | 13.3303  |
| CDK2:CE          | Not Active | 4.8887   |
| CDK7:Cyc H:MNAT1 | Not Active | 4.4466   |
| CDK8:CC          | Not Active | 9.3184   |
| CDK9:CT          | Not Active | 17.7407  |
| CHK1             | Not Active | 6.8989   |
| cKIT             | Not Active | -2.4802  |
| CLK1             | Not Active | 3.3321   |
| CLK2             | Not Active | 22.8558  |
| CLK3             | Not Active | -2.2334  |
| CLK4             | Not Active | 31.802   |
| cRAF             | Not Active | 14.788   |
| CSF1R            | Not Active | 20.2412  |
| CSNK1g1          | Not Active | 1.1816   |
| CSNK2a2          | Not Active | 10.6358  |
| DDR2             | Not Active | -15.5418 |
| DMPK             | Not Active | 28.3686  |
| DNA-PK           | Not Active | 18.8937  |
| DYRK2            | Not Active | 44.4647  |
| EEF2K            | Not Active | 4.1952   |
| EGFR             | Not Active | 14.3406  |
| EGFR             | Not Active | 7.3997   |
| EPHA5            | Not Active | 1.731    |
| EPHB1            | Not Active | 5.8652   |
| EphB4            | Not Active | 1.2483   |
| ERBB2            | Not Active | -3.1664  |
| ERBB4            | Not Active | 11.3787  |
| FER              | Not Active | 7.2245   |
| FES              | Not Active | 7.0928   |
| FGFR1            | Not Active | 18.5759  |
| FGFR1            | Not Active | 8.5845   |
| FGFR2            | Not Active | 0.1979   |
| FGFR3            | Not Active | -4.8161  |



|           |            |         |
|-----------|------------|---------|
| FGFR4     | Not Active | -6.3695 |
| FLT1      | Not Active | 0.545   |
| FLT3      | Not Active | 37.9699 |
| FRAP1     | Not Active | -2.0508 |
| FYN       | Not Active | 6.1576  |
| GSG2      | Not Active | -9.345  |
| GSK3A     | Not Active | 6.4355  |
| GSK3b     | Not Active | 9.9126  |
| IGF1R     | Not Active | 9.9446  |
| IKKb      | Not Active | -2.1996 |
| INSR      | Not Active | 5.3953  |
| INSRR     | Not Active | 8.3017  |
| IRAK1     | Not Active | 28.9156 |
| IRAK4     | Not Active | 5.7262  |
| JAK1      | Not Active | 2.8192  |
| JAK2      | Not Active | 10.4032 |
| JAK3      | Active     | 91.3381 |
| JNK1      | Not Active | -2.4002 |
| KDR       | Not Active | 7.2639  |
| LCK       | Not Active | 8.7298  |
| LRRK2     | Not Active | 62.8362 |
| LYN       | Not Active | 7.2292  |
| MAP2K1    | Not Active | 23.0239 |
| MAP3K7    | Not Active | 8.709   |
| MAP3K9    | Active     | 78.0416 |
| MAP4K1    | Not Active | 63.3246 |
| MAP4K3    | Not Active | 13.7004 |
| MAPK1     | Not Active | -6.6124 |
| MAPKAPK1A | Not Active | 8.7053  |
| MAPKAPK2  | Not Active | -2.2108 |
| MAPKAPK5  | Not Active | 4.0045  |
| MARK1     | Not Active | 6.1203  |
| MARK2     | Not Active | 3.6804  |
| MERTK     | Not Active | 6.5516  |
| MINK      | Not Active | 27.4689 |

|               |            |          |
|---------------|------------|----------|
| MKNK2         | Active     | 81.8623  |
| MSK1          | Not Active | 13.4108  |
| MST1R         | Not Active | 4.3346   |
| MTK           | Not Active | 0.739    |
| MYLK          | Not Active | 4.6767   |
| NEK2          | Not Active | 8.4752   |
| NTRK3         | Not Active | 3.2836   |
| p38a          | Not Active | 1.0674   |
| P70S6K        | Not Active | -1.6506  |
| PAK1          | Not Active | 2.7646   |
| PAK2          | Not Active | -5.2479  |
| PAK4          | Not Active | 12.3944  |
| PAK5          | Not Active | -2.015   |
| PDGFRb        | Not Active | 4.607    |
| PDPK1         | Not Active | 8.3308   |
| PEAK1         | Not Active | 1.6678   |
| PI3Kb         | Not Active | 7.2992   |
| PI3Kd         | Not Active | -14.4975 |
| PI3Kg         | Not Active | -1.1335  |
| PI4KB         | Not Active | 16.5089  |
| PIK3C2A       | Not Active | 8.4876   |
| PIK3C3        | Not Active | -15.9787 |
| PIK3CA:PIK3R1 | Not Active | 14.6996  |
| PIM2          | Not Active | -0.671   |
| PKAa          | Not Active | -1.9774  |
| PKCa          | Not Active | 9.1996   |
| PKCe          | Not Active | 0.8238   |
| PKCt          | Not Active | 7.0026   |
| PKG1          | Not Active | 6.8632   |
| PLK1          | Not Active | 5.4516   |
| PTK2          | Not Active | 6.0151   |
| PTK6          | Not Active | 6.0857   |
| RET           | Not Active | 17.1842  |
| RET           | Not Active | 4.4412   |
| RET           | Not Active | 6.2398   |

|        |            |         |
|--------|------------|---------|
| ROCK1  | Not Active | 4.3474  |
| ROCK2  | Not Active | 15.2329 |
| ROS1   | Not Active | 42.4392 |
| SGK1   | Not Active | 2.0186  |
| src    | Not Active | 12.9527 |
| SRPK1  | Not Active | 2.5765  |
| STK17A | Not Active | 33.8272 |
| STK4   | Not Active | 7.2365  |
| SYK    | Not Active | 12.783  |
| TBK1   | Not Active | 16.2422 |
| TGFBR1 | Not Active | 26.431  |
| TNIK   | Not Active | 18.5095 |
| TRKA   | Not Active | 17.3486 |
| TRKB   | Not Active | 1.0203  |
| TYRO3  | Not Active | 7.291   |
| ULK2   | Not Active | 19.2106 |
| YES    | Not Active | -2.8244 |
| ZAP70  | Not Active | 1.3958  |

#### Data for compound 26

| Kinase Name | Activity flag | Mean Inhibition (%) |
|-------------|---------------|---------------------|
| AAK1        | Not Active    | -2.514              |
| ABL1        | Not Active    | 36.7956             |
| ABL2        | Not Active    | 25.7212             |
| ACVR1       | Not Active    | 0.1494              |
| ACVR1B      | Not Active    | -12.1776            |
| ACVR2A      | Not Active    | -20.6184            |
| ACVR2B      | Not Active    | 7.1074              |
| ACVRL1      | Not Active    | 9.6785              |
| ADRBK1      | Not Active    | -1.8509             |
| ADRBK2      | Not Active    | -4.4028             |
| AKT1        | Not Active    | -1.6351             |
| AKT2        | Not Active    | 0.393               |
| AKT3        | Not Active    | -1.8231             |

|               |            |          |
|---------------|------------|----------|
| ALK           | Not Active | 0.7571   |
| AMPK A1/B2/G3 | Not Active | -1.533   |
| AMPK A2/B1/G2 | Not Active | -8.3562  |
| AMPK A2/B1/G3 | Not Active | -0.6813  |
| AMPK A2/B2/G3 | Not Active | 0.4433   |
| AMPK A1/B2/G2 | Not Active | 2.4598   |
| AMPK A1/B1/G1 | Not Active | -2.6216  |
| AMPK A1/B1/G2 | Not Active | -5.4346  |
| AMPK A1/B1/G3 | Not Active | 15.1246  |
| AMPK A1/B2/G1 | Not Active | 3.3355   |
| AMPK A2/B2/G1 | Not Active | -7.8911  |
| AMPK A2/B2/G2 | Not Active | -18.5772 |
| AMPK A2/B1/G1 | Not Active | 1.4163   |
| ANKK1         | Not Active | 6.217    |
| ARK5          | Not Active | -0.9867  |
| AurKA         | Not Active | -3.7077  |
| AurKB         | Not Active | 20.774   |
| AurKC         | Not Active | 25.6249  |
| AXL           | Not Active | 4.4458   |
| BLK           | Not Active | 26.4655  |
| BMPR1A        | Not Active | -7.8191  |
| BMPR1B        | Not Active | 1.0099   |
| BMPR2         | Not Active | -8.474   |
| BMX           | Not Active | 5.6165   |
| bRAF          | Not Active | 67.7454  |
| bRAF          | Not Active | 1.8286   |
| BRSK1         | Not Active | -1.6163  |
| BRSK2         | Not Active | 13.0234  |
| BTK           | Not Active | -2.3674  |
| CABC1         | Not Active | 1.7936   |
| CaMK1         | Not Active | -6.4542  |
| CAMK1d        | Not Active | 1.2912   |
| CAMK1G        | Not Active | 2.7656   |
| CAMK2a        | Not Active | -4.2435  |
| CAMK2b        | Not Active | -3.225   |

|                      |            |         |
|----------------------|------------|---------|
| CAMK2d               | Not Active | 6.5317  |
| CAMK2g               | Not Active | -4.6494 |
| CAMK4                | Not Active | 1.5763  |
| CAMKK1               | Not Active | -3.6928 |
| CAMKK2               | Not Active | 6.2573  |
| CASK                 | Not Active | -8.2405 |
| CDC42BP <sub>a</sub> | Not Active | 0.8111  |
| CDC42BP <sub>b</sub> | Not Active | 7.5027  |
| CDC42BPG             | Not Active | -4.537  |
| CDC7                 | Not Active | 12.7868 |
| CDK1:CB              | Not Active | -5.5598 |
| CDK13:CCNK           | Not Active | 0.2454  |
| CDK19                | Not Active | -3.1541 |
| CDK19:CCNC           | Not Active | -2.5886 |
| CDK2:CA              | Not Active | 11.9094 |
| CDK2:CA              | Not Active | 1.5552  |
| CDK2:CE              | Not Active | 6.9772  |
| CDK2:Cyclin O        | Not Active | 10.4209 |
| CDK3:Cyclin E        | Not Active | 8.0254  |
| CDK4:CD1             | Not Active | -3.4815 |
| CDK4:CD3             | Not Active | -1.854  |
| CDK5                 | Not Active | 1.2303  |
| CDK5                 | Not Active | 4.3012  |
| CDK5                 | Not Active | -0.2273 |
| CDK6:CycD1           | Not Active | -6.0844 |
| CDK7:Cyc H:MNAT1     | Not Active | -18.701 |
| CDK8:CC              | Not Active | -4.3892 |
| CDK9                 | Not Active | -7.7491 |
| CDK9                 | Not Active | 12.6031 |
| CDK9:CT              | Not Active | -7.7756 |
| CDKL5                | Not Active | -0.0132 |
| CHK1                 | Not Active | 21.3479 |
| CHK2                 | Not Active | 3.2003  |
| cKIT                 | Not Active | 48.5912 |
| CLK1                 | Not Active | -1.2575 |

|          |            |          |
|----------|------------|----------|
| CLK2     | Not Active | 9.9227   |
| CLK3     | Not Active | -0.5732  |
| CLK4     | Not Active | 2.0205   |
| CSF1R    | Active     | 92.1339  |
| CSK      | Not Active | 38.3658  |
| CSNK1A1  | Not Active | 12.8887  |
| CSNK1A1L | Not Active | 2.303    |
| CSNK1d   | Not Active | 2.7856   |
| CSNK1E   | Not Active | 8.772    |
| CSNK1g1  | Not Active | -1.596   |
| CSNK1g2  | Not Active | -3.9386  |
| CSNK1g3  | Not Active | -2.487   |
| CSNK2A1  | Not Active | 2.4774   |
| CSNK2a2  | Not Active | 6.412    |
| DAPK1    | Not Active | -16.9999 |
| DAPK2    | Not Active | 11.3548  |
| DAPK3    | Not Active | -8.108   |
| DCAMKL2  | Not Active | -3.3181  |
| DCLK1    | Not Active | -6.7092  |
| DDR1     | Not Active | 26.0986  |
| DDR2     | Not Active | 28.761   |
| DMPK     | Not Active | -4.9986  |
| DNA-PK   | Not Active | 5.1586   |
| DYRK1A   | Not Active | 0.816    |
| DYRK1b   | Not Active | 1.9828   |
| DYRK2    | Not Active | -3.2872  |
| DYRK3    | Not Active | -3.1968  |
| DYRK4    | Not Active | -1.007   |
| EEF2K    | Not Active | 0.4815   |
| EGFR     | Not Active | 1.5935   |
| EIF2AK2  | Not Active | -2.4795  |
| EPHA1    | Not Active | 3.2162   |
| EPHA3    | Not Active | 0.5311   |
| EPHA4    | Not Active | -0.9242  |
| EPHA5    | Not Active | -0.2279  |

|        |            |          |
|--------|------------|----------|
| EPHA6  | Not Active | 8.1605   |
| EPHA7  | Not Active | -17.0597 |
| EPHA8  | Not Active | 1.1623   |
| EPHB1  | Not Active | 1.9382   |
| EPHB2  | Not Active | -1.1874  |
| EPHB3  | Not Active | -2.4014  |
| EphB4  | Not Active | -5.9307  |
| EPHRA2 | Not Active | -18.3359 |
| ERBB2  | Not Active | -26.3594 |
| ERBB4  | Not Active | -0.6242  |
| ERN1   | Not Active | 4.2634   |
| ERN2   | Not Active | 0.9538   |
| FER    | Not Active | 4.9372   |
| FES    | Not Active | -3.749   |
| FGFR1  | Not Active | 0.7141   |
| FGFR2  | Not Active | -3.6502  |
| FGFR3  | Not Active | -13.1132 |
| FGFR4  | Not Active | -2.5773  |
| FGR    | Not Active | 28.7353  |
| FLT1   | Not Active | -0.679   |
| FLT3   | Not Active | 19.5915  |
| FLT4   | Not Active | 7.1352   |
| FRAP1  | Not Active | -1.5702  |
| FRK    | Not Active | 7.0623   |
| FYN    | Not Active | 19.1797  |
| FYN    | Not Active | 13.2957  |
| GAK    | Not Active | 5.772    |
| GRK1   | Not Active | 2.7402   |
| GRK4   | Not Active | -5.7218  |
| GRK5   | Not Active | -0.8492  |
| GRK6   | Not Active | -7.3992  |
| GRK7   | Not Active | -7.1098  |
| GSG2   | Not Active | 2.1795   |
| GSK3A  | Not Active | 3.083    |
| GSK3b  | Not Active | 3.1896   |

|       |            |         |
|-------|------------|---------|
| HCK   | Not Active | 22.3389 |
| HIPK1 | Not Active | -4.4768 |
| HIPK2 | Not Active | -0.3725 |
| HIPK3 | Not Active | -2.5806 |
| HIPK4 | Not Active | 3.1703  |
| HUNK  | Not Active | 6.1858  |
| IGF1R | Not Active | -2.3744 |
| IKKa  | Not Active | -7.5622 |
| IKKb  | Not Active | -1.6212 |
| IKKe  | Not Active | 0.084   |
| INSR  | Not Active | -3.2737 |
| INSRR | Not Active | -0.3296 |
| IRAK1 | Not Active | 1.3789  |
| IRAK3 | Not Active | 8.6365  |
| IRAK4 | Not Active | -5.9368 |
| ITK   | Not Active | 5.5982  |
| JAK1  | Not Active | 0.1819  |
| JAK2  | Not Active | -5.7933 |
| JAK2  | Not Active | -2.2972 |
| JAK3  | Not Active | -5.9852 |
| JNK1  | Not Active | -13.916 |
| JNK1  | Not Active | 7.274   |
| JNK3  | Not Active | 6.453   |
| JNK3  | Not Active | -0.9194 |
| KDR   | Not Active | 58.3984 |
| KSR2  | Not Active | 2.7424  |
| LATS2 | Not Active | -4.9043 |
| LCK   | Active     | 92.9366 |
| LCK   | Not Active | -2.7543 |
| LIMK1 | Not Active | 39.4231 |
| LIMK2 | Not Active | 14.9854 |
| LRRK2 | Not Active | 3.6574  |
| LRRK2 | Not Active | 0.9912  |
| LTK   | Not Active | -0.7886 |
| LYN   | Not Active | 57.0578 |



|           |            |          |
|-----------|------------|----------|
| LYN       | Not Active | 58.8141  |
| MAP2K1    | Not Active | -11.7041 |
| MAP2K1    | Not Active | -2.5137  |
| MAP2K2    | Not Active | 6.1703   |
| MAP2K2    | Not Active | 3.6096   |
| MAP2K4    | Not Active | 9.4686   |
| MAP2K5    | Not Active | 2.1753   |
| MAP2K6    | Not Active | 3.551    |
| MAP2K6    | Not Active | 8.0006   |
| MAP3K10   | Not Active | -4.7244  |
| MAP3K11   | Not Active | 0.8229   |
| MAP3K14   | Not Active | 0.1223   |
| MAP3K2    | Not Active | -8.8374  |
| MAP3K3    | Not Active | 0.0502   |
| MAP3K5    | Not Active | -11.4194 |
| MAP3K7    | Not Active | 10.4833  |
| MAP3K8    | Not Active | 5.7642   |
| MAP3K9    | Not Active | -14.7382 |
| MAP4K1    | Not Active | 17.783   |
| MAP4K2    | Not Active | 12.8842  |
| MAP4K3    | Not Active | 25.3408  |
| MAP4K4    | Not Active | 36.3272  |
| MAP4K5    | Active     | 80.2741  |
| MAPK1     | Not Active | -6.4226  |
| MAPK13    | Not Active | -1.5718  |
| MAPK15    | Not Active | 9.3096   |
| MAPK3     | Not Active | -2.602   |
| MAPK7     | Not Active | -3.0275  |
| MAPK9     | Not Active | 1.7662   |
| MAPK9     | Not Active | 4.0628   |
| MAPKAP3   | Not Active | 1.0734   |
| MAPKAPK1A | Not Active | 5.7407   |
| MAPKAPK1B | Not Active | -1.3214  |
| MAPKAPK2  | Not Active | -0.5722  |
| MAPKAPK5  | Not Active | -3.7368  |

|       |            |          |
|-------|------------|----------|
| MARK1 | Not Active | 3.3236   |
| MARK2 | Not Active | -3.6675  |
| MARK3 | Not Active | -1.7215  |
| MARK4 | Not Active | 0.108    |
| MASTL | Not Active | -5.5809  |
| MATK  | Not Active | 2.2758   |
| MELK  | Not Active | 1.2115   |
| MERTK | Not Active | 2.0088   |
| MINK  | Not Active | -28.2092 |
| MKNK1 | Not Active | 1.7727   |
| MKNK2 | Not Active | 2.5003   |
| MLK4  | Not Active | -8.0124  |
| MSK1  | Not Active | 2.1011   |
| MST1R | Not Active | 0.4375   |
| MST4  | Not Active | 5.7471   |
| MTK   | Not Active | 4.1741   |
| MUSK  | Not Active | 4.534    |
| MYLK  | Not Active | -0.0096  |
| MYLK2 | Not Active | -1.484   |
| MYLK3 | Not Active | 11.6614  |
| MYLK4 | Not Active | 13.0256  |
| MYO3A | Not Active | -8.2777  |
| MYO3B | Not Active | 8.194    |
| NEK1  | Not Active | 1.2561   |
| NEK2  | Not Active | -5.1718  |
| NEK4  | Not Active | -2.2358  |
| NEK6  | Not Active | -0.6284  |
| NEK8  | Not Active | -6.9331  |
| NEK9  | Not Active | -2.3288  |
| NIM1  | Not Active | -1.2894  |
| NLK   | Not Active | -4.1754  |
| NTRK3 | Not Active | -1.937   |
| NUAK2 | Not Active | -4.9216  |
| p38a  | Not Active | 4.6111   |
| p38a  | Not Active | 1.1482   |

|                |            |          |
|----------------|------------|----------|
| p38b           | Not Active | -1.3953  |
| p38g           | Not Active | -6.7944  |
| P70S6K         | Not Active | -10.8647 |
| PAK1           | Not Active | 15.778   |
| PAK2           | Not Active | -2.7663  |
| PAK3           | Not Active | 7.859    |
| PAK4           | Not Active | -2.0129  |
| PAK5           | Not Active | -12.744  |
| PAK6           | Not Active | 3.8134   |
| PASK           | Not Active | 6.9677   |
| PCTK1          | Not Active | 8.201    |
| PCTK2          | Not Active | -1.161   |
| PCTK3          | Not Active | -3.9148  |
| PDGFRa         | Active     | 87.6201  |
| PDGFRb         | Active     | 97.8194  |
| PDPK1          | Not Active | -2.128   |
| PDPK1          | Not Active | 2.0565   |
| PEAK1          | Not Active | -7.2694  |
| PFTK1          | Not Active | -9.0361  |
| PHKG1          | Not Active | -3.4148  |
| PHKG2          | Not Active | -10.2921 |
| PI3Ka          | Not Active | 2.5011   |
| PI3Kb          | Not Active | -0.1373  |
| PI3Kd          | Not Active | -2.5212  |
| PI3Kg          | Not Active | 32.6563  |
| PI4K?          | Not Active | -3.3356  |
| PI4K2A         | Not Active | -18.8804 |
| PI4K3A         | Not Active | 8.492    |
| PI4KB          | Not Active | -31.2582 |
| PIK3C2A        | Not Active | -3.5343  |
| PIK3C2B        | Not Active | -1.1773  |
| PIK3C2G        | Not Active | -7.9012  |
| PIK3C3         | Not Active | -1.3341  |
| PIK3CA:PIK3R1  | Not Active | -3.65    |
| PIK3CB: PIK3R2 | Not Active | -4.9451  |

|         |            |          |
|---------|------------|----------|
| PIM1    | Not Active | 3.7972   |
| PIM2    | Not Active | -5.8398  |
| PIM3    | Not Active | 6.4307   |
| PIP5K1A | Not Active | 7.8142   |
| PIP5K1B | Not Active | 0.4546   |
| PIP5K1C | Not Active | 8.4031   |
| PIP5K2A | Not Active | 7.718    |
| PKAa    | Not Active | 1.5972   |
| PKCa    | Not Active | -1.5834  |
| PKCb    | Not Active | -1.4681  |
| PKCb    | Not Active | -6.944   |
| PKCd    | Not Active | 5.164    |
| PKCe    | Not Active | -8.1972  |
| PKCg    | Not Active | -2.0944  |
| PKCh    | Not Active | 4.9319   |
| PKCi    | Not Active | -0.1248  |
| PKCRK2  | Not Active | 5.357    |
| PKCt    | Not Active | -10.0319 |
| PKCz    | Not Active | 3.7496   |
| PKD1    | Not Active | 4.9023   |
| PKD2    | Not Active | 1.2898   |
| PKG1    | Not Active | 8.9793   |
| PKMYT1  | Not Active | -16.7792 |
| PKN1    | Not Active | 2.4695   |
| PKX     | Not Active | -3.094   |
| PLK1    | Not Active | 3.847    |
| PLK2    | Not Active | 0.7585   |
| PLK3    | Not Active | -2.836   |
| PLK4    | Not Active | 8.0021   |
| PRKACB  | Not Active | -11.901  |
| PRKACG  | Not Active | 2.5296   |
| PRKD3   | Not Active | 4.7444   |
| PRKG2   | Not Active | 0.916    |
| PTK2    | Not Active | 3.7271   |
| PTK2b   | Not Active | 4.5302   |

|         |            |          |
|---------|------------|----------|
| PTK6    | Not Active | -3.7964  |
| RET     | Active     | 98.1885  |
| RIPK2   | Not Active | 48.8754  |
| RIPK3   | Not Active | 61.07    |
| ROCK1   | Not Active | 10.7988  |
| ROCK2   | Not Active | -6.9814  |
| ROS1    | Not Active | -3.638   |
| RPS6KA2 | Not Active | 2.3604   |
| RPS6KA4 | Not Active | -2.1533  |
| RPS6KA6 | Not Active | 3.144    |
| RPS6KB2 | Not Active | 7.5368   |
| SBK1    | Not Active | 0.3238   |
| SGK1    | Not Active | -3.9972  |
| SGK2    | Not Active | 2.3833   |
| SGK3    | Not Active | -3.7416  |
| SIK1    | Not Active | -1.6398  |
| SIK3    | Not Active | -9.9554  |
| SLK     | Not Active | -0.814   |
| SNF1LK2 | Not Active | -0.5124  |
| SphK1   | Not Active | -3.937   |
| SphK2   | Not Active | 6.9198   |
| src     | Not Active | 6.1794   |
| SRMS    | Not Active | -1.201   |
| SRPK1   | Not Active | -0.768   |
| SRPK2   | Not Active | -2.8148  |
| STE20   | Not Active | -3.5264  |
| STK16   | Not Active | 8.3312   |
| STK17A  | Not Active | -14.4982 |
| STK17B  | Not Active | 2.9058   |
| STK23   | Not Active | -4.0315  |
| STK24   | Not Active | 3.6746   |
| STK25   | Not Active | 2.4988   |
| STK32B  | Not Active | -3.2289  |
| STK32C  | Not Active | 5.001    |
| STK33   | Not Active | 0.0062   |

|                |            |          |
|----------------|------------|----------|
| STK38          | Not Active | -1.1223  |
| STK38L         | Not Active | -8.2522  |
| STK39          | Not Active | 8.5262   |
| STK4           | Not Active | -5.8051  |
| SYK            | Not Active | 0.5504   |
| TAO2           | Not Active | 0.8342   |
| TAO3           | Not Active | 4.9162   |
| TAOK1          | Not Active | 2.1886   |
| TBK1           | Not Active | -2.248   |
| TEC            | Not Active | -6.9758  |
| TESK1          | Not Active | -4.7141  |
| TESK2          | Not Active | 14.1032  |
| TGFBR1         | Not Active | 9.5964   |
| TGFBR2         | Not Active | 5.2548   |
| TIE2           | Not Active | 6.1946   |
| TLK1           | Not Active | -6.0237  |
| TLK2           | Not Active | -3.7008  |
| TNIK           | Not Active | 70.6957  |
| TNK1           | Not Active | 8.6212   |
| TNK2           | Active     | 76.6878  |
| TRKA           | Not Active | 6.9286   |
| TRKB           | Not Active | -4.9116  |
| TSSK1A; TSSK1B | Not Active | -0.7173  |
| TSSK2          | Not Active | 1.3973   |
| TTK            | Not Active | -10.3016 |
| TXK            | Not Active | 6.6321   |
| TYK2           | Not Active | -0.5864  |
| TYRO3          | Not Active | 0.3211   |
| ULK1           | Not Active | -10.1536 |
| ULK2           | Not Active | -1.6615  |
| ULK3           | Not Active | -11.1906 |
| VRK2           | Not Active | 11.7068  |
| WEE1           | Not Active | -10.8813 |
| WNK1           | Not Active | -3.1211  |
| WNK2           | Not Active | 3.8232   |

|       |            |         |
|-------|------------|---------|
| Wnk3  | Not Active | -18.605 |
| Yes   | Not Active | 6.4422  |
| Ysk4  | Not Active | -9.3702 |
| Zak   | Not Active | 33.165  |
| Zap70 | Not Active | 0.5569  |

## Synthetic Experimental Section

### General Experimental

Air and/or moisture sensitive reactions were performed under an atmosphere of nitrogen. Dry organic solvents and starting materials were obtained from commercial sources and used as received unless otherwise specified. 4 Å molecular sieves were oven-dried prior to use.

Reactions were monitored by thin layer chromatography (TLC) using Merck silica gel 60 covered alumina plates F254 or by analytical UPLC. Visualisation of TLC plates was carried out under UV light and stained using potassium permanganate solution. Analytical UPLC was performed on CSH C18 reverse-phase silica, using a Waters XSelect CSH C18 column with dimensions 2.1 x 50mm and particle size 1.7 micron). Gradient analysis was employed using decreasingly polar mixtures as eluent, for example decreasingly polar mixtures of water (containing 0.1% formic acid or 0.1% ammonia) as solvent A and acetonitrile as solvent B. Normal phase flash column chromatography was performed using ultra performance Interchim puriflash 50 µm silica columns and carried out using Teledyne ISCO Combiflash Lumen system. Reverse phase column chromatography was carried out using preparative HPLC (Waters XSelect CSH C18 ODB column, 5µ silica, 30 mm diameter, 100 mm length) Interchim 4250 system.

All  $^1\text{H}$  spectra were recorded on Bruker 400 MHz or 500 MHz spectrometers at rt.  $^1\text{H}$  NMR data are reported as follows: chemical shifts in ppm relative to  $\text{CDCl}_3$  (7.26) or  $\text{d}_6\text{-DMSO}$  (2.50) on the  $\delta$  scale, multiplicity (s = singlet, d = doublet, t = triplet, q = quartet, m = multiplet, br = broad, app. = apparent or a combination of thereof), coupling constant(s) J (Hz) and integration,. All  $^{13}\text{C}$  NMR spectra were recorded on Bruker 400 MHz and Bruker 500 MHz spectrometers at 101 MHz and 126 MHz respectively. Data are reported as follows; chemical shifts in ppm relative to  $\text{CDCl}_3$  (77.16) or  $\text{d}_6\text{-DMSO}$  (39.52) on the  $\delta$  scale. Low resolution mass spectra were recorded by UPLC methods on reverse-phase C18 silica with detection by Electrospray Mass Spectrometry using positive or negative ion electrospray (ESI+ or ESI-) and by UV absorbance recording a wavelength range of 220-320 nm. High resolution mass spectra were recorded on Thermo Scientific and Fusion Orbitrap MS using positive or negative ion electrospray (ESI+ or ESI-).



## Experimental Procedures

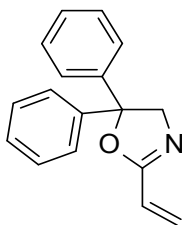

**5,5-diphenyl-2-vinyl-4H-oxazole (1):** Acryloyl chloride (0.052 mL, 0.64 mmol) was added to 2-amino-1,1-diphenylethan-1-ol<sup>a</sup> (130 mg, 0.61 mmol) and triethylamine (0.212 mL, 1.52 mmol) in DCM (3 mL) at 0 °C over a period of 5 minutes under nitrogen. The resulting solution was warmed to rt and stirred at rt for 2.5 hours. The reaction mixture was quenched with saturated NH<sub>4</sub>Cl (10 mL) and diluted with DCM (10 mL). The biphasic mixture was separated, and the organic layer washed with saturated brine (10 mL). The organic layer was dried over MgSO<sub>4</sub>, filtered and evaporated to afford crude material. The crude product was purified by preparative HPLC (Waters XSelect CSH C18 ODB column, 5 μ silica, 30 mm diameter, 100 mm length), using decreasingly polar mixtures of water (containing 1% NH<sub>3</sub>) and MeCN as eluents. Fractions containing the desired compound were combined and diluted with DCM (50 mL) and saturated aq. NH<sub>4</sub>Cl (50 mL). The biphasic mixture was separated and the organic phase dried over MgSO<sub>4</sub>, filtered and evaporated to afford *N*-(2-hydroxy-2,2-diphenylethyl)acrylamide (57.1 mg) as a yellow solid.

Methanesulfonic acid (0.03 mL, 0.46 mmol) was added to *N*-(2-hydroxy-2,2-diphenylethyl)acrylamide (25 mg, 0.09 mmol) in DCM (2.000 mL) at 25 °C under nitrogen. The resulting solution was stirred at 45 °C for 4 hours. The reaction mixture was quenched with saturated NaHCO<sub>3</sub> (10 mL), extracted with DCM (10 mL), the organic layer was dried over a phase separating cartridge, filtered and evaporated to afford crude material. The crude material was loaded on to two 0.25 mm silica plates and purified by prep TLC (eluent 35% EtOAc in heptane). UV active material at R<sub>f</sub> 0.40 was taken and dissolved in DCM, silica was filtered off and the solvent was removed under vacuum to afford 5,5-diphenyl-2-vinyl-4,5-dihydrooxazole (6.1 mg, 26%, over 2 steps) as a colorless wax. <sup>1</sup>H NMR (400 MHz, DMSO) 4.48 (s, 2H), 5.86 (dd, *J* = 10.4, 2.0 Hz, 1H), 6.28 (dd, *J* = 17.5, 2.0 Hz, 1H), 6.37 (dd, *J* = 17.5, 10.4 Hz, 1H), 7.27 – 7.32 (m, 2H), 7.35 – 7.45 (m, 8H); <sup>13</sup>C NMR (101 MHz, DMSO, 30 °C) 161.1, 144.3, 128.5, 127.6, 126.7, 125.2, 124.8, 89.0, 67.9; HRMS (ESI+) calcd for C<sub>17</sub>H<sub>15</sub>NO [M+H]<sup>+</sup> 250.1226, found 250.1232

<sup>a</sup>2-amino-1,1-diphenylethan-1-ol was made according to literature procedure<sup>13</sup>

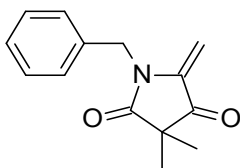

**1-benzyl-3,3-dimethyl-5-methylene-pyrrolidine-2,4-dione (3):** Diisopropylamine (0.650 mL, 4.60 mmol) was added to 1-benzyl-3,3-dimethylpyrrolidine-2,4-dione (250 mg, 1.15 mmol)<sup>b</sup> in THF (20 mL) at 25 °C under nitrogen. The resulting solution was warmed to 65 °C and stirred for 30 minutes. Paraformaldehyde (207 mg, 2.30 mmol) in THF (20 mL) was added and the reaction stirred for 4 hours. Water (10 mL) was subsequently added and the solution heated at reflux for a further 17 hours. The reaction mixture was quenched with 2M HCl (5 mL), diluted with water (50 mL) and extracted with Et<sub>2</sub>O (2 x 50 mL). The organic layers were combined and washed with saturated brine (100 mL). The organic layer was dried with a phase separating cartridge, filtered and evaporated to afford crude product. The crude product was purified by flash silica chromatography, elution gradient 0 to 50% EtOAc in heptane. Pure fractions were evaporated to dryness to afford 1-benzyl-3,3-dimethyl-5-methylenepyrrolidine-2,4-dione (200 mg, 76%) as a colorless oil. <sup>1</sup>H NMR (400 MHz, DMSO) 1.21 (s, 6H), 4.71 (d, *J* = 2.1 Hz, 1H), 4.84 (s, 2H), 5.05 (d, *J* = 2.1 Hz, 1H), 7.24 – 7.31 (m, 3H), 7.31 – 7.4 (m, 2H); <sup>13</sup>C NMR (101 MHz, DMSO, 30 °C) 199.7, 175.0, 140.1, 135.4, 128.6, 127.4, 127.0, 92.3, 44.7, 42.6, 20.1; HRMS (ESI+) calcd for C<sub>14</sub>H<sub>15</sub>NO<sub>2</sub> [M+H]<sup>+</sup> 230.1176, found 230.1176

<sup>b</sup>1-benzyl-3,3-dimethylpyrrolidine-2,4-dione was made according to literature procedure<sup>14</sup>

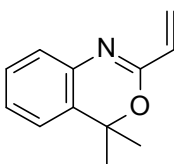

**4,4-dimethyl-2-vinyl-3,1-benzoxazine (5a):** Acryloyl chloride (0.24 mL, 2.91 mmol) was added dropwise to 2-(2-aminophenyl)propan-2-ol (440 mg, 2.91 mmol) and triethylamine (1.01 mL, 7.27 mmol) in DCM (13.5 mL) at 25 °C over a period of 5 minutes under nitrogen. The resulting solution was stirred at rt for 90 minutes. The reaction mixture was washed sequentially with saturated NH<sub>4</sub>Cl (15 mL) and saturated NaHCO<sub>3</sub> (15 mL). The organic layer was dried with a phase separating cartridge, filtered and evaporated to afford crude *N*-(2-(2-hydroxypropan-2-yl)phenyl)acrylamide (589 mg) as an orange oil, which was used directly without further purification.

Methanesulfonic acid (0.08 mL, 1.23 mmol) was added to crude *N*-(2-(2-hydroxypropan-2-yl)phenyl)acrylamide (50 mg) in DCM (5 mL) at 25 °C under nitrogen. The resulting solution was warmed to 45 °C and stirred for 3 hours. The reaction was cooled to rt and quenched with saturated NaHCO<sub>3</sub> (10 mL). The organic layer was dried over a phase separating cartridge, filtered and evaporated to afford 4,4-dimethyl-2-vinyl-4H-benzo[d][1,3]oxazine (45.8 mg, quant., over 2 steps) as an orange oil. <sup>1</sup>H NMR (400 MHz, DMSO) 1.58 (s, 6H), 5.74 (dd, *J* = 10.4, 1.8 Hz, 1H), 6.14 (dd, *J* = 17.4, 1.8 Hz, 1H), 6.28 (dd, *J* = 17.4, 10.4 Hz, 1H), 7.07 – 7.14 (m, 1H), 7.18 – 7.24 (m, 1H), 7.25 – 7.31 (m, 2H); <sup>13</sup>C

NMR (101 MHz, DMSO, 30 °C) 155.5, 137.9, 131.7, 131.4, 128.4, 126.9, 124.9, 124.4, 122.8, 77.6, 27.9; HRMS (ESI+) calcd for C<sub>12</sub>H<sub>13</sub>NO [M+H]<sup>+</sup> 188.0679, found 188.0699.

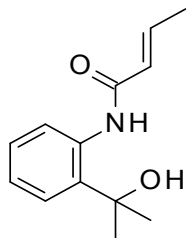

**(E)-N-[2-(1-hydroxy-1-methyl-ethyl)phenyl]but-2-enamide:** (*E*)-but-2-enoyl chloride (0.09 mL, 0.94 mmol) was added to 2-(2-aminophenyl)propan-2-ol (145 mg, 0.96 mmol) and triethylamine (0.33 mL, 2.37 mmol) in DCM (4.5 mL) at 25 °C under nitrogen. The resulting solution was stirred at rt for 90 minutes. The reaction mixture was diluted with DCM (10 mL), and washed sequentially with saturated NH<sub>4</sub>Cl (20 mL) and saturated NaHCO<sub>3</sub> (20 mL). The organic layer was dried with a phase separating cartridge, filtered and evaporated to afford crude product. The crude product was purified by preparative HPLC (Waters XSelect CSH C18 ODB column, 5μ silica, 30 mm diameter, 100 mm length), using decreasingly polar mixtures of water (containing 1% NH<sub>3</sub>) and MeCN as eluents. Fractions containing the desired compound were evaporated to dryness to afford (*E*)-N-(2-(2-hydroxypropan-2-yl)phenyl)but-2-enamide (43.8 mg, 21%) as a white solid. <sup>1</sup>H NMR (400 MHz, DMSO) 1.53 (s, 6H), 1.88 (dd, *J* = 6.8, 1.7 Hz, 3H), 5.96 – 6.02 (m, 1H), 6.14 (s, 1H), 6.76 (dq, *J* = 15.2, 6.8 Hz, 1H), 7.02 (td, *J* = 7.8, 1.5 Hz, 1H), 7.22 (ddd, *J* = 8.3, 7.8, 1.5 Hz, 1H), 7.29 (dd, *J* = 7.8, 1.5 Hz, 1H), 8.20 (d, *J* = 8.3 Hz, 1H), 10.59 (s, 1H); <sup>13</sup>C NMR (101 MHz, DMSO, 30 °C) 162.6, 139.5, 137.1, 127.1, 126.9, 125.4, 123.1, 121.6, 72.8, 30.0, 17.4; LRMS *m/z* (ESI-) [M-H]<sup>-</sup> 218.3

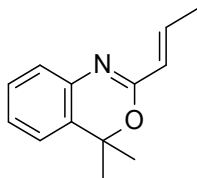

**4,4-dimethyl-2-[(E)-prop-1-enyl]-3,1-benzoxazine (5b):** Methanesulfonic acid (0.06 mL, 0.92 mmol) was added to (*E*)-N-(2-(2-hydroxypropan-2-yl)phenyl)but-2-enamide (41 mg, 0.19 mmol) in DCM (4.0 mL) under nitrogen. The resulting solution was warmed to 45 °C and stirred for 1 hour. The reaction mixture was diluted with DCM (5 mL) and washed with saturated NaHCO<sub>3</sub> (40 mL). The organic layer was dried with a phase separating cartridge, filtered and evaporated to afford desired (*E*)-4,4-dimethyl-2-(prop-1-en-1-yl)-4H-benzo[d][1,3]oxazine (26.0 mg, 69%) as a white waxy solid. <sup>1</sup>H NMR (400 MHz, DMSO) 1.55 (s, 6H), 1.88 (dd, *J* = 6.9, 1.6 Hz, 3H), 5.99 (dq, *J* = 15.5, 1.6 Hz, 1H), 6.71 (dq, *J* = 15.5, 6.9 Hz, 1H), 7.05 – 7.08 (m, 1H), 7.15 – 7.2 (m, 1H), 7.23 – 7.28 (m, 2H); <sup>13</sup>C NMR (101 MHz, DMSO, 30 °C) 155.7, 138.3, 138.1, 131.4, 128.3, 126.4, 125.8, 124.1, 122.7, 77.3, 27.8, 17.8; HRMS (ESI+) calcd for C<sub>13</sub>H<sub>15</sub>NO [M+H]<sup>+</sup> 202.12264, found 202.12282.

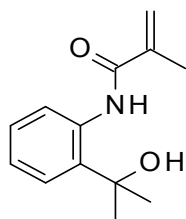

***N*-[2-(1-hydroxy-1-methyl-ethyl)phenyl]-2-methyl-prop-2-enamide:** Methacryloyl chloride (0.094 mL, 0.96 mmol) was added to 2-(2-aminophenyl)propan-2-ol (145 mg, 0.96 mmol) and triethylamine (0.33 mL, 2.37 mmol) in DCM (4.5 mL) under nitrogen. The resulting solution was stirred at rt for 1 hour. The reaction mixture was diluted with DCM (5 mL), and washed sequentially with saturated  $\text{NH}_4\text{Cl}$  (15 mL) and saturated  $\text{NaHCO}_3$  (15 mL). The organic layer was dried with a phase separating cartridge, filtered and evaporated to afford desired product. The crude product was purified by preparative HPLC (Waters XSelect CSH C18 ODB column, 5  $\mu$  silica, 30 mm diameter, 100 mm length), using decreasingly polar mixtures of water (containing 1%  $\text{NH}_3$ ) and MeCN as eluents. Fractions containing the desired compound were evaporated to dryness to afford *N*-(2-(2-hydroxypropan-2-yl)phenyl)methacrylamide (108 mg, 51%) as a white solid.  $^1\text{H}$  NMR (400 MHz, DMSO) 1.54 (s, 6H), 1.99 (dd,  $J$  = 1.4, 0.9 Hz, 3H), 5.51 – 5.54 (m, 1H), 5.8 – 5.83 (m, 1H), 6.24 (s, 1H), 6.99 – 7.08 (m, 1H), 7.21 – 7.26 (m, 1H), 7.29 (dd,  $J$  = 7.8, 1.4 Hz, 1H), 8.29 (dd,  $J$  = 8.2, 1.4 Hz, 1H), 11.05 (s, 1H);  $^{13}\text{C}$  NMR (101 MHz, DMSO, 30 °C) 164.6, 140.6, 137.1, 135.9, 127.2, 125.4, 123.1, 121.0, 119.9, 72.9, 30.0, 18.4; LRMS  $m/z$  (ESI-)  $[\text{M}-\text{H}]^-$  218.2

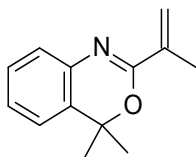

**2-isopropenyl-4,4-dimethyl-3,1-benzoxazine (5c):** Methanesulfonic acid (0.07 mL, 1.08 mmol) was added to *N*-(2-(2-hydroxypropan-2-yl)phenyl)methacrylamide (50 mg, 0.23 mmol) in DCM (5 mL) under nitrogen. The resulting solution was stirred at 45 °C for 1 hour. The reaction mixture was diluted with DCM (5 mL) and washed sequentially with saturated  $\text{NaHCO}_3$  (40 mL). The organic layer was dried with a phase separating cartridge, filtered and evaporated to afford desired product 4,4-dimethyl-2-(prop-1-en-2-yl)-4H-benzo[d][1,3]oxazine (43.2 mg, 94%) as a white waxy solid.  $^1\text{H}$  NMR (400 MHz, DMSO) 1.56 (s, 6H), 2.00 (s, 3H), 5.52 – 5.56 (m, 1H), 5.95 (s, 1H), 7.11 – 7.15 (m, 1H), 7.19 – 7.24 (m, 1H), 7.25 – 7.31 (2H, m);  $^{13}\text{C}$  NMR (101 MHz, DMSO, 30 °C) 156.6, 138.0, 137.9, 131.5, 128.3, 126.9, 124.6, 122.7, 121.2, 77.4, 27.7, 18.4; HRMS (ESI+) calcd for  $\text{C}_{13}\text{H}_{15}\text{NO}$   $[\text{M}+\text{H}]^+$  202.12264, found 202.12302.

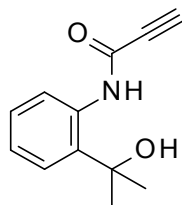

***N*-[2-(1-hydroxy-1-methyl-ethyl)phenyl]prop-2-ynamide:** Dicyclohexylmethanediimine (136 mg, 0.66 mmol) was added to 2-(2-aminophenyl)propan-2-ol (95 mg, 0.63 mmol) and propiolic acid (0.039 mL, 0.63 mmol) in DCM (3.3 mL) under nitrogen. The resulting solution was stirred at rt for 2 hours. The reaction mixture was filtered and solvent evaporated to afford crude product. The crude product was purified by preparative HPLC (Waters XSelect CSH C18 ODB column, 5  $\mu$  silica, 30 mm diameter, 100 mm length), using decreasingly polar mixtures of water (containing 1%  $\text{NH}_3$ ) and MeCN as eluents. Fractions containing the desired compound were evaporated to dryness to afford *N*-(2-(2-hydroxypropan-2-yl)phenyl)propiolamide (67.8 mg, 53%) as a pale yellow waxy solid.  $^1\text{H}$  NMR (400 MHz,  $\text{CDCl}_3$ ) 1.54 (s, 6H), 4.39 (s, 1H), 6.30 (s, 1H), 7.04 – 7.14 (m, 1H), 7.25 (td,  $J$  = 7.9, 1.4 Hz, 1H), 7.29 – 7.37 (m, 1H), 8.03 – 8.11 (m, 1H), 11.1 – 11.25 (m, 1H);  $^{13}\text{C}$  NMR (101 MHz, DMSO, 30  $^\circ\text{C}$ ) 148.7, 136.3, 135.9, 127.3, 125.7, 124.2, 121.8, 78.5, 76.5, 72.9, 30.1; LRMS  $m/z$  (ESI-)  $[\text{M}-\text{H}]^-$  202.0

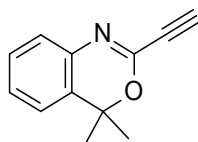

**2-ethynyl-4,4-dimethyl-3,1-benzoxazine (5d):** Methanesulfonic acid (0.1 mL, 1.54 mmol) was added to *N*-(2-(2-hydroxypropan-2-yl)phenyl)propiolamide (61 mg, 0.30 mmol) in DCM (6.5 mL) under nitrogen. The resulting solution was warmed to 45  $^\circ\text{C}$  and stirred for 1 hour. The reaction mixture was diluted with DCM (5 mL) and washed sequentially with saturated  $\text{NaHCO}_3$  (25 mL) and saturated brine (10 mL). The organic layer was dried with a phase separating cartridge, filtered and evaporated to afford crude product. The crude product was purified by preparative HPLC (Waters XSelect CSH C18 ODB column, 5  $\mu$  silica, 30 mm diameter, 100 mm length), using decreasingly polar mixtures of water (containing 1%  $\text{NH}_3$ ) and MeCN as eluents. Fractions containing the desired compound were evaporated to dryness to afford 2-ethynyl-4,4-dimethyl-4H-benzo[d][1,3]oxazine (19.6 mg, 35%) as an amorphous orange solid.  $^1\text{H}$  NMR (400 MHz, DMSO) 1.60 (s, 6H), 4.40 (s, 1H), 7.06 – 7.14 (m, 1H), 7.22 – 7.35 (m, 3H);  $^{13}\text{C}$  NMR (126 MHz, DMSO, 27  $^\circ\text{C}$ ) 142.4, 136.8, 131.2, 128.6, 128.1, 124.4, 123.1, 79.6, 79.1, 77.3, 28.1; HRMS (ESI+) calcd for  $\text{C}_{12}\text{H}_{11}\text{NO}$   $[\text{M}+\text{H}]^+$  186.09134, found 186.09149.

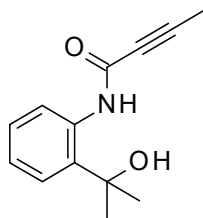

***N*-[2-(1-hydroxy-1-methyl-ethyl)phenyl]but-2-ynamide:** Dicyclohexylmethanediimine (136 mg, 0.66 mmol) was added to 2-(2-aminophenyl)propan-2-ol (95 mg, 0.63 mmol) and but-2-ynoic acid (52.8 mg, 0.63 mmol) in DCM (3.3 mL) under nitrogen. The resulting solution was stirred at rt for 2 hours. The reaction mixture was filtered and solvent evaporated to afford crude product. The crude product was purified by preparative HPLC (Waters XSelect CSH C18 ODB column, 5  $\mu$  silica, 30 mm diameter, 100 mm length), using decreasingly polar mixtures of water (containing 1% NH<sub>3</sub>) and MeCN as eluents. Fractions containing the desired compound were evaporated to dryness to afford *N*-(2-(2-hydroxypropan-2-yl)phenyl)but-2-ynamide (128 mg, 94%) as a colorless waxy solid. <sup>1</sup>H NMR (400 MHz, DMSO) 1.53 (s, 6H), 2.03 (s, 3H), 6.23 (s, 1H), 7.01 – 7.1 (m, 1H), 7.18 – 7.27 (m, 1H), 7.27 – 7.34 (m, 1H), 8.08 (d, *J* = 8.0 Hz, 1H), 10.90 (s, 1H); <sup>13</sup>C NMR (101 MHz, DMSO, 30 °C) 149.6, 136.2, 136.1, 127.2, 125.5, 123.8, 121.7, 83.8, 75.9, 72.8, 30.1, 3.0; LRMS *m/z* (ESI-) [M-H]<sup>-</sup> 216.2

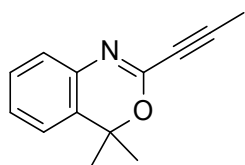

**4,4-dimethyl-2-(prop-1-yn-1-yl)-3,1-benzoxazine (5e):** Methanesulfonic acid (0.06 mL, 0.92 mmol) was added to *N*-(2-(2-hydroxypropan-2-yl)phenyl)but-2-ynamide (39 mg, 0.18 mmol) in DCM (3.9 mL) under nitrogen. The resulting solution was warmed to 45 °C and stirred for 2 hours. The reaction mixture was diluted with DCM (5 mL) and washed sequentially with saturated NaHCO<sub>3</sub> (25 mL) and saturated brine (10 mL). The organic layer was dried with a phase separating cartridge, filtered and evaporated to afford crude product. The crude product was purified by flash silica chromatography, elution gradient 0 to 30% EtOAc in heptane. Pure fractions were evaporated to dryness to afford 4,4-dimethyl-2-(prop-1-yn-1-yl)-4H-benzo[d][1,3]oxazine (23 mg, 64%) as a colorless oil which solidified on standing. <sup>1</sup>H NMR (400 MHz, DMSO) 1.57 (s, 6H), 2.05 (s, 3H), 7.05 (dd, *J* = 8.0, 1.5 Hz, 1H), 7.2 – 7.31 (m, 3H); <sup>13</sup>C NMR (101 MHz, DMSO, 30 °C) 143.1, 137.3, 131.1, 128.5, 127.5, 124.1, 122.9, 86.3, 79.1, 74.4, 28.0, 3.3; HRMS (ESI+) calcd for C<sub>13</sub>H<sub>13</sub>NO [M+H]<sup>+</sup> 200.10699, found 200.10704.

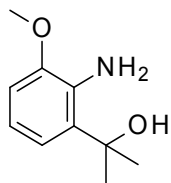

**2-(2-amino-3-methoxyphenyl)propan-2-ol:** Methylmagnesium bromide (3M in Et<sub>2</sub>O) (11.4 mL, 34.2 mmol) was added dropwise to methyl 2-amino-3-methoxybenzoate (1.98 g, 10.9 mmol) in THF (25 mL) over a period of 30 minutes under nitrogen. The resulting solution was stirred at rt for 18 hours. The reaction mixture was quenched with saturated NH<sub>4</sub>Cl (25 mL), extracted with EtOAc (2 x 20 mL). The organic layer was dried over a phase separating cartridge, filtered and evaporated to afford 2-(2-amino-3-methoxyphenyl)propan-2-ol (1.96 g, 99%) as a yellow oil which solidified on standing. <sup>1</sup>H NMR (400 MHz, DMSO) 1.50 (s, 6H), 3.76 (s, 3H), 5.07 (s, 2H), 5.20 (s, 1H), 6.49 (t, *J* = 7.9 Hz, 1H), 6.69 (dd, *J* = 7.9, 1.1 Hz, 1H), 6.73 (dd, *J* = 7.9, 1.1 Hz, 1H); <sup>13</sup>C NMR (101 MHz, DMSO, 30 °C) 146.9, 135.7, 131.0, 117.7, 115.1, 109.0, 72.1, 55.5, 29.2; LRMS *m/z* (ESI+) [M-OH]<sup>+</sup> 164.1

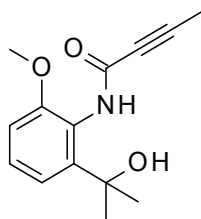

***N*-[2-(1-hydroxy-1-methyl-ethyl)-6-methoxyphenyl]but-2-ynamide:** Dicyclohexylmethanediimine (2.45 g, 11.9 mmol) was added to 2-(2-amino-3-methoxyphenyl)propan-2-ol (1.96 g, 10.8 mmol) and 2-butyric acid (0.918 g, 10.9 mmol) in DCM (55 mL) under nitrogen. The resulting suspension was stirred at rt for 2 hours. The reaction mixture was diluted with Et<sub>2</sub>O (50 mL), filtered and the solvent removed under vacuum to afford the crude as a pale yellow solid. The crude product was purified by flash silica chromatography, elution gradient 40 to 60% EtOAc in heptane. Pure fractions were evaporated to dryness to afford *N*-(2-(2-hydroxypropan-2-yl)-6-methoxyphenyl)but-2-ynamide (1.59 g, 59%) as a white solid. <sup>1</sup>H NMR (400 MHz, DMSO) 1.42 (s, 6H), 2.01 (s, 3H), 3.29 (s, 1H), 3.71 (s, 3H), 5.20 (s, 1H), 6.9 – 6.98 (m, 1H), 7.15 – 7.25 (m, 2H), 9.38 (s, 1H); <sup>13</sup>C NMR (101 MHz, DMSO, 30 °C) 155.3, 151.5, 146.7, 127.1, 122.5, 117.6, 110.5, 82.9, 76.0, 71.1, 55.7, 30.2, 3.0; LRMS *m/z* (ESI-) [M-H]<sup>-</sup> 246.1

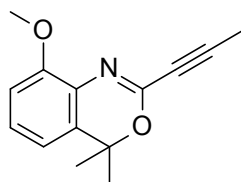

**8-methoxy-4,4-dimethyl-2-prop-1-ynyl-3,1-benzoxazine (o-MeO-5e):** Methanesulfonic acid (0.41 mL, 6.31 mmol) was added to *N*-(2-(2-hydroxypropan-2-yl)-6-methoxyphenyl)but-2-ynamide (310 mg, 1.25 mmol) in DCM (27.5 mL) under nitrogen. The resulting solution was warmed to 45 °C and stirred for 3 hours. The reaction mixture was quenched with saturated NaHCO<sub>3</sub> (30 mL), the organic layer was dried over a phase separating cartridge, filtered and evaporated to afford colorless oil. The crude product was purified by flash silica chromatography, elution gradient 35 to 50% EtOAc in heptane. Pure fractions were evaporated to dryness to afford 8-methoxy-4,4-dimethyl-2-(prop-1-yn-1-yl)-4H-benzo[d][1,3]oxazine (153 mg, 53%) as a colorless oil. <sup>1</sup>H NMR (400 MHz, DMSO) 1.54 (s, 6H), 2.04 (s, 3H), 3.77 (s, 3H), 6.83 (dd, *J* = 7.8, 1.1 Hz, 1H), 6.92 (dd, *J* = 8.3, 1.1 Hz, 1H), 7.18 (dd, *J* = 8.3, 7.8 Hz, 1H); <sup>13</sup>C NMR (101 MHz, DMSO, 30 °C) 152.2, 141.8, 132.2, 128.0, 126.6, 114.5, 111.5, 86.0, 78.6, 74.7, 55.6, 27.9, 3.3; HRMS (ESI+) calcd for C<sub>14</sub>H<sub>15</sub>NO<sub>2</sub> [M+H]<sup>+</sup> 230.1181, found 230.1182.

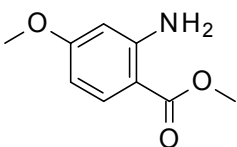

**methyl 2-amino-4-methoxybenzoate:** A solution of methyl 4-methoxy-2-nitrobenzoate (1 g, 4.74 mmol) in EtOH (24 mL) was added slowly to 10% palladium on charcoal (100 mg, 4.74 mmol) under a positive flow of nitrogen. The resulting suspension was placed under a hydrogen atmosphere and stirred at rt for 17 hours. The reaction mixture was filtered over celite and washed with EtOH (3 x 30 mL). The solvent was removed under vacuum to afford the crude as a brown solid. The crude product was purified by flash silica chromatography, elution gradient 10 to 50% EtOAc in heptane. Pure fractions were evaporated to dryness to afford methyl 2-amino-4-methoxybenzoate (0.794 g, 93%) as a white solid. <sup>1</sup>H NMR (400 MHz, DMSO) 3.72 (s, 3H), 3.74 (s, 3H), 6.13 (dd, *J* = 9.0, 2.5 Hz, 1H), 6.27 (d, *J* = 2.5 Hz, 1H), 6.68 (s, 2H), 7.62 (d, *J* = 9.0 Hz, 1H); <sup>13</sup>C NMR (101 MHz, DMSO, 30 °C) 167.4, 163.7, 153.3, 132.3, 103.6, 102.4, 98.6, 54.9, 51.0; LRMS *m/z* (ESI+) [M+H]<sup>+</sup> 182.0

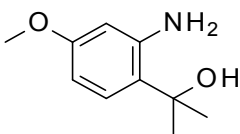

**2-(2-amino-4-methoxyphenyl)propan-2-ol:** Methylmagnesium bromide (3M in Et<sub>2</sub>O) (4.5 mL, 13.5 mmol) was added dropwise to methyl 2-amino-4-methoxybenzoate (785 mg, 4.33 mmol) in THF (10 mL) over a period of 20 minutes under nitrogen. The resulting solution was stirred at rt for 18 hours. The reaction mixture was quenched with saturated NH<sub>4</sub>Cl (15 mL), extracted with EtOAc (2 x 20 mL), the organic layer was dried over a phase separating cartridge, filtered and evaporated to afford 2-(2-amino-4-methoxyphenyl)propan-2-ol (782 mg, quant.) as a yellow



oil which solidified on standing and was used without further purification.  $^1\text{H}$  NMR (400 MHz, DMSO) 1.46 (s, 6H), 3.63 (s, 3H), 5.04 (s, 1H), 5.40 (s, 2H), 6.04 (dd,  $J = 8.5, 2.7$  Hz, 1H), 6.18 (d,  $J = 2.7$  Hz, 1H), 6.88 (d,  $J = 8.5$  Hz, 1H);  $^{13}\text{C}$  NMR (101 MHz, DMSO, 30 °C) 158.7, 148.1, 125.9, 124.0, 101.2, 100.8, 71.7, 54.5, 29.4; LRMS  $m/z$  (ESI+)  $[\text{M}-\text{OH}]^+$  164.1

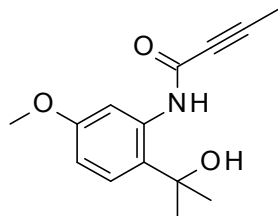

***N*-[2-(1-hydroxy-1-methyl-ethyl)-5-methoxy-phenyl]but-2-ynamide:** Dicyclohexylmethanediimine (971 mg, 4.70 mmol) was added to 2-(2-amino-4-methoxyphenyl)propan-2-ol (775 mg, 4.28 mmol) and 2-butyric acid (363 mg, 4.32 mmol) in DCM (21 mL) under nitrogen. The resulting solution was stirred at rt for 2 hours. The reaction mixture was diluted with Et<sub>2</sub>O (50 mL), filtered and the solvent removed under vacuum to afford the crude as a yellow oil. The crude product was purified by flash silica chromatography, elution gradient 5 to 50% EtOAc in heptane. Pure fractions were evaporated to dryness to afford *N*-(2-(2-hydroxypropan-2-yl)-5-methoxyphenyl)but-2-ynamide (927 mg, 88%) as a colorless oil which solidified on standing.  $^1\text{H}$  NMR (400 MHz, DMSO) 1.50 (s, 6H), 2.03 (s, 3H), 3.71 (s, 3H), 6.16 (s, 1H), 6.63 (dd,  $J = 8.7, 2.7$  Hz, 1H), 7.19 (d,  $J = 8.7$  Hz, 1H), 7.77 (d,  $J = 2.7$  Hz, 1H), 10.98 (s, 1H);  $^{13}\text{C}$  NMR (101 MHz, DMSO, 30 °C) 158.1, 149.6, 137.3, 128.2, 126.3, 108.5, 107.4, 83.8, 75.9, 72.6, 55.0, 30.3, 3.0; LRMS  $m/z$  (ESI-)  $[\text{M}-\text{H}]^-$  246.1

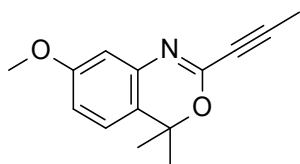

**7-methoxy-4,4-dimethyl-2-prop-1-ynyl-3,1-benzoxazine (*m*-OMe-5e):** Methanesulfonic acid (0.35 mL, 5.39 mmol) was added to *N*-(2-(2-hydroxypropan-2-yl)-5-methoxyphenyl)but-2-ynamide (260 mg, 1.05 mmol) in DCM (23 mL) under nitrogen. The resulting solution was warmed to 45 °C and stirred for 3 hours. The reaction mixture was quenched with saturated NaHCO<sub>3</sub> (25 mL), the organic layer was dried over a phase separating cartridge, filtered and evaporated to afford yellow oil. The crude product was purified by flash silica chromatography, elution gradient 30 to 40% EtOAc in heptane. Pure fractions were evaporated to dryness to afford 7-methoxy-4,4-dimethyl-2-(prop-1-yn-1-yl)-4H-benzo[d][1,3]oxazine (188 mg, 78%) as a pale yellow oil.  $^1\text{H}$  NMR (400 MHz, DMSO) 1.54 (s, 6H), 2.04 (s, 3H), 3.74 (s, 3H), 6.62 (d,  $J = 2.7$  Hz, 1H), 6.79 (dd,  $J = 8.5, 2.7$  Hz, 1H), 7.17 (d,  $J = 8.5$  Hz, 1H);  $^{13}\text{C}$  NMR (101 MHz,

DMSO, 30 °C) 159.3, 143.5, 138.5, 123.9, 123.4, 113.1, 109.1, 86.4, 79.2, 74.4, 55.2, 28.2, 3.3; HRMS (ESI+) calcd for  $C_{14}H_{15}NO_2$   $[M+H]^+$  230.1181, found 230.1182.

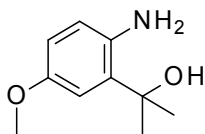

**2-(2-amino-5-methoxyphenyl)propan-2-ol:** Methylmagnesium bromide (3M in Et<sub>2</sub>O) (11.4 mL, 34.2 mmol) was added dropwise to methyl 2-amino-5-methoxybenzoate (2.0 g, 11.0 mmol) in THF (25 mL) over a period of 30 minutes under nitrogen. The resulting solution was stirred at rt for 20 hours. The reaction mixture was quenched with saturated NH<sub>4</sub>Cl (25 mL), extracted with EtOAc (2 x 20 mL), the organic layer was dried over a phase separating cartridge, filtered and evaporated to afford brown oil. The crude product was purified by flash silica chromatography, elution gradient 5 to 60% EtOAc in heptane. Pure fractions were evaporated to dryness to afford 2-(2-amino-5-methoxyphenyl)propan-2-ol (1.65 g, 82%) as a yellow oil. <sup>1</sup>H NMR (400 MHz, DMSO) 1.48 (s, 6H), 3.62 (s, 3H), 4.97 (s, 2H), 5.15 (s, 1H), 6.52 – 6.6 (m, 2H), 6.62 (d, *J* = 2.6 Hz, 1H); <sup>13</sup>C NMR (101 MHz, DMSO, 30 °C) 150.4, 140.5, 132.2, 116.8, 112.2, 112.0, 71.9, 55.3, 29.0; LRMS *m/z* (ESI+)  $[M-OH]^+$  164.1

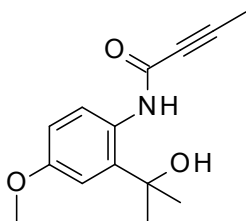

***N*-[2-(1-hydroxy-1-methyl-ethyl)-4-methoxyphenyl]but-2-ynamide:** Dicyclohexylmethanediimine (2.02 g, 9.79 mmol) was added to 2-(2-amino-5-methoxyphenyl)propan-2-ol (1.61 g, 8.88 mmol) and 2-butyneic acid (0.752 g, 8.94 mmol) in DCM (45 mL) under nitrogen. The resulting suspension was stirred at rt for 1 hour. The reaction mixture was diluted with Et<sub>2</sub>O (50 mL), filtered and the solvent removed under vacuum to afford the crude as a yellow oil. The crude product was purified by flash silica chromatography, elution gradient 0 to 60% EtOAc in heptane. Pure fractions were evaporated to dryness to afford *N*-(2-(2-hydroxypropan-2-yl)-4-methoxyphenyl)but-2-ynamide (1.96 g, 89%) as a yellow foam. <sup>1</sup>H NMR (400 MHz, DMSO) 1.51 (s, 6H), 2.02 (s, 3H), 3.73 (s, 3H), 6.12 (s, 1H), 6.75 – 6.87 (m, 2H), 7.92 (d, *J* = 8.6 Hz, 1H), 10.60 (s, 1H); <sup>13</sup>C NMR (101 MHz, DMSO, 30 °C) 155.4, 149.5, 138.5, 129.2, 123.5, 112.0, 111.3, 83.4, 76.0, 72.6, 55.2, 30.0, 3.0; LRMS *m/z* (ESI+)  $[M-OH]^+$  230.0

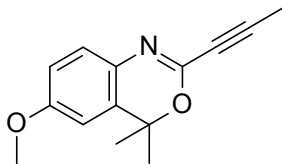

**6-methoxy-4,4-dimethyl-2-prop-1-ynyl-3,1-benzoxazine (p-OMe-5e):** Methanesulfonic acid (0.58 mL, 8.93 mmol) was added to *N*-(2-(2-hydroxypropan-2-yl)-4-methoxyphenyl)but-2-ynamide (440 mg, 1.78 mmol) in DCM (40 mL) under nitrogen. The resulting solution was warmed to 45 °C and stirred for 3 hours. The reaction mixture was quenched with saturated NaHCO<sub>3</sub> (50 mL), the organic layer was dried over a phase separating cartridge, filtered and evaporated to afford yellow oil. The crude product was purified by flash silica chromatography, elution gradient 10 to 50% EtOAc in heptane. Pure fractions were evaporated to dryness to afford 6-methoxy-4,4-dimethyl-2-(prop-1-yn-1-yl)-4H-benzo[d][1,3]oxazine (237 mg, 58%) as a pale yellow oil. <sup>1</sup>H NMR (400 MHz, DMSO) 1.55 (s, 6H), 2.03 (s, 3H), 3.76 (s, 3H), 6.79 – 6.88 (m, 2H), 6.96 – 7.03 (m, 1H); <sup>13</sup>C NMR (101 MHz, DMSO, 30 °C) 158.6, 141.1, 132.5, 130.8, 125.4, 113.3, 108.8, 85.7, 78.8, 74.5, 55.4, 27.9, 3.3; HRMS (ESI+) calcd for C<sub>14</sub>H<sub>15</sub>NO<sub>2</sub> [M+H]<sup>+</sup> 230.1181, found 230.1182.

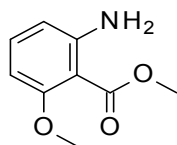

**methyl 2-amino-6-methoxybenzoate:** A solution of methyl 2-methoxy-6-nitrobenzoate (1.01 g, 4.74 mmol) in EtOH (24 mL) was added slowly to 10% Palladium on charcoal (100 mg, 4.74 mmol) under a positive flow of nitrogen. The resulting suspension was placed under a hydrogen atmosphere and stirred at rt for 17 hours. The reaction mixture was filtered over celite and washed with EtOH (3 x 30 mL). The solvent was removed under vacuum to afford the crude as a yellow oil. The crude product was purified by flash silica chromatography, elution gradient 10 to 50% EtOAc in heptane. Pure fractions were evaporated to dryness to afford methyl 2-amino-6-methoxybenzoate (841 mg, 98%) as a pale yellow oil which solidified on standing. <sup>1</sup>H NMR (400 MHz, DMSO) 3.69 (s, 3H), 3.74 (s, 3H), 5.64 (s, 2H), 6.19 (dd, *J* = 8.2, 0.8 Hz, 1H), 6.33 (dd, *J* = 8.2, 0.8 Hz, 1H), 7.06 (t, *J* = 8.2 Hz, 1H); <sup>13</sup>C NMR (101 MHz, DMSO, 30 °C) 167.6, 158.8, 149.1, 131.9, 108.6, 104.7, 98.6, 55.5, 51.4; LRMS *m/z* (ESI+) [M+H]<sup>+</sup> 182.0

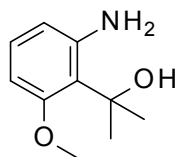

**2-(2-amino-6-methoxy-phenyl)propan-2-ol:** Methylmagnesium bromide (3M in Et<sub>2</sub>O) (4.8 mL, 14.4 mmol) was added dropwise to methyl 2-amino-6-methoxybenzoate (839 mg, 4.63 mmol) in THF (10.7 mL) over a period of 30 minutes under nitrogen. The resulting solution was stirred at rt for 17 hours. The reaction mixture was quenched with saturated NH<sub>4</sub>Cl (15 mL), extracted with EtOAc (2 x 20 mL), the organic layer was dried over a phase separating cartridge, filtered and evaporated to afford 2-(2-amino-6-methoxyphenyl)propan-2-ol (831 mg, 99%) as an orange oil which solidified on standing. <sup>1</sup>H NMR (400 MHz, DMSO) 1.55 (s, 6H), 3.65 (s, 3H), 5.24 (s, 1H), 5.76 (s, 2H), 6.14 (dd, *J* = 8.0, 1.2 Hz, 1H), 6.19 (dd, *J* = 8.0, 1.2 Hz, 1H), 6.79 (t, *J* = 8.0 Hz, 1H); <sup>13</sup>C NMR (101 MHz, DMSO, 30 °C) 157.4, 148.5, 126.7, 118.1, 110.5, 100.3, 74.1, 55.3, 30.7; LRMS *m/z* (ESI+) [M-OH]<sup>+</sup> 164.1

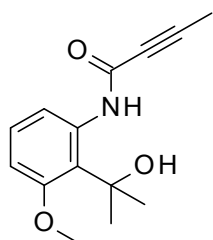

***N*-[2-(1-hydroxy-1-methyl-ethyl)-3-methoxy-phenyl]but-2-ynamide:** Dicyclohexylmethanediimine (1.04 g, 5.03 mmol) was added to 2-(2-amino-6-methoxyphenyl)propan-2-ol (829 mg, 4.57 mmol) and 2-butyric acid (388 mg, 4.62 mmol) in DCM (23 mL) under nitrogen. The resulting suspension was stirred at rt for 3 hours. The reaction mixture was diluted with Et<sub>2</sub>O (50 mL), filtered and the solvent removed under vacuum to afford a yellow solid. The crude product was purified by flash silica chromatography, elution gradient 0 to 50% EtOAc in heptane. Pure fractions were evaporated to dryness to afford *N*-(2-(2-hydroxypropan-2-yl)-3-methoxyphenyl)but-2-ynamide (195 mg, 17%) as a white solid. <sup>1</sup>H NMR (400 MHz, DMSO) 1.61 (s, 6H), 2.00 (s, 3H), 3.75 (s, 3H), 6.45 (s, 1H), 6.77 (dd, *J* = 8.3, 1.0 Hz, 1H), 7.15 (t, *J* = 8.3 Hz, 1H), 7.89 (d, *J* = 8.3 Hz, 1H), 12.11 (s, 1H); <sup>13</sup>C NMR (126 MHz, DMSO, 27 °C) 156.7, 149.5, 137.7, 127.3, 123.1, 114.4, 108.4, 83.0, 76.4, 75.4, 55.8, 30.7, 3.0; LRMS *m/z* (ESI-) [M-H]<sup>-</sup> 246.2

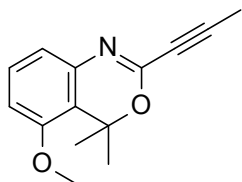

**5-methoxy-4,4-dimethyl-2-prop-1-ynyl-3,1-benzoxazine (*m'*-OMe-5e):** Methanesulfonic acid (0.25 mL, 3.85 mmol) was added to *N*-(2-(2-hydroxypropan-2-yl)-3-methoxyphenyl)but-2-ynamide (185 mg, 0.75 mmol) in DCM (16.5 mL) under nitrogen. The resulting solution was warmed to 45 °C and stirred for 3 hours. The reaction mixture was quenched with saturated NaHCO<sub>3</sub> (25 mL), the organic layer was dried over a phase separating cartridge, filtered

and evaporated to afford yellow oil. The crude product was purified by flash silica chromatography, elution gradient 25 to 40% EtOAc in heptane. Pure fractions were evaporated to dryness to afford 5-methoxy-4,4-dimethyl-2-(prop-1-yn-1-yl)-4H-benzo[d][1,3]oxazine (109 mg, 64%) as a pale yellow oil.  $^1\text{H}$  NMR (400 MHz, DMSO) 1.62 (s, 6H), 2.04 (s, 3H), 3.80 (s, 3H), 6.67 (dd,  $J = 7.8, 1.0$  Hz, 1H), 6.92 (dd,  $J = 8.4, 1.0$  Hz, 1H), 7.22 (dd,  $J = 8.4, 7.8$  Hz, 1H);  $^{13}\text{C}$  NMR (101 MHz, DMSO, 30 °C) 154.6, 142.7, 138.5, 128.9, 117.6, 117.5, 111.1, 86.1, 79.4, 74.3, 55.8, 28.3, 3.3; HRMS (ESI+) calcd for  $\text{C}_{14}\text{H}_{15}\text{NO}_2$   $[\text{M}+\text{H}]^+$  230.1181, found 230.1182.

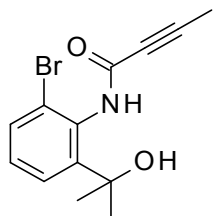

***N*-[2-bromo-6-(1-hydroxy-1-methyl-ethyl)phenyl]but-2-ynamide:** Methylmagnesium bromide (3M in  $\text{Et}_2\text{O}$ ) (2.6 mL, 7.80 mmol) was added dropwise to methyl 2-amino-3-bromobenzoate (360 mg, 1.56 mmol) in THF (10 mL) at 0 °C under nitrogen. The resulting solution was warmed to rt and stirred for 30 minutes. The reaction mixture was quenched with water (10 mL), brine (20 mL) added and extracted with EtOAc (2 x 25 mL). The organic layer was dried over a phase separating cartridge, filtered and evaporated to afford the crude as pale yellow oil (361 mg) which was used directly without further purification.

dicyclohexylmethanediimine (338 mg, 1.64 mmol) was added to 2-(2-amino-3-bromophenyl)propan-2-ol (359 mg) and but-2-ynoic acid (138 mg, 1.64 mmol) in DCM (8 mL) under nitrogen. The resulting solution was stirred at rt for 3 hours. The reaction was incomplete and further but-2-ynoic acid (138 mg, 1.64 mmol) and dicyclohexylmethanediimine (338 mg, 1.64 mmol) were added and the suspension was stirred at rt for a further 18 hours. The reaction mixture was diluted with  $\text{Et}_2\text{O}$  (20 mL), filtered and the solvent removed under vacuum to afford yellow oil. The crude product was purified by flash silica chromatography, elution gradient 0 to 100% EtOAc in heptane. Pure fractions were evaporated to dryness to afford *N*-(2-bromo-6-(2-hydroxypropan-2-yl)phenyl)but-2-ynamide (264 mg, 57%, over 2 steps) as a pale yellow solid.  $^1\text{H}$  NMR (400 MHz, DMSO) 1.43 (s, 6H), 2.04 (s, 3H), 5.33 (s, 1H), 7.20 (t,  $J = 8.0$  Hz, 1H), 7.57 (dd,  $J = 8.0, 1.4$  Hz, 1H), 7.67 (dd,  $J = 8.0, 1.4$  Hz, 1H), 9.99 (s, 1H);  $^{13}\text{C}$  NMR (101 MHz, DMSO, 30 °C) 151.5, 149.2, 132.3, 131.1, 128.4, 125.7, 124.7, 83.9, 75.7, 71.2, 30.2, 3.1; LRMS  $m/z$  (ESI-)  $[\text{M}-\text{H}]^-$  294.0

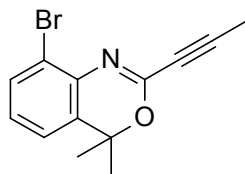

**8-bromo-4,4-dimethyl-2-prop-1-ynyl-3,1-benzoxazine (o-Br-5e):** Methanesulfonic acid (0.14 mL, 2.16 mmol) was added to *N*-(2-bromo-6-(2-hydroxypropan-2-yl)phenyl)but-2-ynamide (125 mg, 0.42 mmol) in DCM (9.2 mL) under nitrogen. The resulting solution was warmed to 45 °C and stirred for 2 hours. The reaction mixture was diluted with DCM (5 mL) and washed sequentially with saturated NaHCO<sub>3</sub> (25 mL) and saturated brine (10 mL). The organic layer was dried with a phase separating cartridge, filtered and evaporated to afford crude product. The crude product was purified by flash silica chromatography, elution gradient 0 to 25% EtOAc in heptane. Pure fractions were evaporated to dryness to afford 8-bromo-4,4-dimethyl-2-(prop-1-yn-1-yl)-4H-benzo[d][1,3]oxazine (63.5 mg, 54%) as a colorless oil. <sup>1</sup>H NMR (400 MHz, DMSO) 1.59 (s, 6H), 2.08 (s, 3H), 7.15 (t, *J* = 7.8 Hz, 1H), 7.29 (dd, *J* = 7.8, 1.3 Hz, 1H), 7.57 (dd, *J* = 7.8, 1.3 Hz, 1H); <sup>13</sup>C NMR (101 MHz, DMSO, 30 °C) 144.1, 135.4, 133.1, 132.3, 128.7, 122.7, 119.2, 87.9, 79.5, 74.3, 27.9, 3.4; HRMS (ESI+) calcd for C<sub>13</sub>H<sub>12</sub>BrNO [M+H]<sup>+</sup> 278.0181, found 278.0176

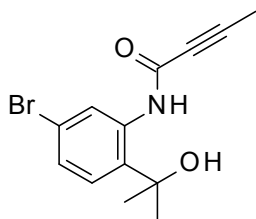

***N*-[5-bromo-2-(1-hydroxy-1-methyl-ethyl)phenyl]but-2-ynamide:** Methylmagnesium bromide (3M in Et<sub>2</sub>O) (2.6 mL, 7.80 mmol) was added dropwise to methyl 2-amino-4-bromobenzoate (363 mg, 1.58 mmol) in THF (10 mL) at 0 °C under nitrogen. The resulting solution was warmed to rt and stirred for 45 minutes. The reaction mixture was quenched with water (10 mL), brine (20 mL) added and extracted with EtOAc (2 x 25 mL). The organic layer was dried over a phase separating cartridge, filtered and evaporated to afford the crude (368 mg) as brown oil which was used directly without further purification.

Dicyclohexylmethanediimine (338 mg, 1.64 mmol) was added to 2-(2-amino-4-bromophenyl)propan-2-ol (364 mg) and but-2-ynoic acid (139 mg, 1.66 mmol) in DCM (8 mL) under nitrogen. The resulting solution was stirred at rt for 1 hour. The reaction mixture was diluted with Et<sub>2</sub>O (20 mL), and washed sequentially with saturated NaHCO<sub>3</sub> (25 mL) and saturated brine (25 mL). The organic layer was dried with a phase separating cartridge, filtered and evaporated to afford crude product. The crude product was purified by flash silica chromatography, elution gradient 0 to 35% EtOAc in heptane. Pure fractions were evaporated to dryness to afford *N*-(5-bromo-2-(2-hydroxypropan-2-yl)phenyl)but-2-ynamide (259 mg, 55%, over 2 steps) as a pale yellow solid. <sup>1</sup>H NMR (400 MHz, DMSO) 1.52 (s, 6H), 2.04 (s, 3H), 6.38 (s, 1H), 7.25 (d, *J* = 1.0 Hz, 2H), 8.33 (s, 1H), 11.05 (s, 1H); <sup>13</sup>C NMR (101 MHz, DMSO, 30 °C) 149.8, 137.7, 135.2, 127.7, 126.3, 123.6, 119.8, 84.7, 75.6, 72.8, 29.9, 3.0; LRMS *m/z* (ESI-) [M-H]<sup>-</sup> 294.0

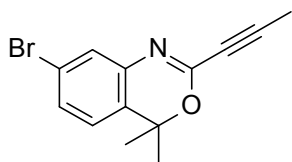

**7-bromo-4,4-dimethyl-2-prop-1-ynyl-3,1-benzoxazine (*m*-Br-5e):** Methanesulfonic acid (0.14 mL, 2.16 mmol) was added to *N*-(5-bromo-2-(2-hydroxypropan-2-yl)phenyl)but-2-ynamide (125 mg, 0.42 mmol) in DCM (9.2 mL) under nitrogen. The resulting solution was warmed to 45 °C and stirred for 2 hours. The reaction mixture was diluted with DCM (5 mL) and washed sequentially with saturated NaHCO<sub>3</sub> (25 mL) and saturated brine (10 mL). The organic layer was dried with a phase separating cartridge, filtered and evaporated to afford crude product. The crude product was purified by flash silica chromatography, elution gradient 0 to 25% EtOAc in heptane. Pure fractions were evaporated to dryness to afford 7-bromo-4,4-dimethyl-2-(prop-1-yn-1-yl)-4H-benzo[d][1,3]oxazine (95 mg, 81%) as a colorless oil. <sup>1</sup>H NMR (400 MHz, DMSO) 1.57 (s, 6H), 2.06 (s, 3H), 7.2 – 7.28 (m, 2H), 7.42 (dd, *J* = 8.2, 2.1 Hz, 1H); <sup>13</sup>C NMR (101 MHz, DMSO, 30 °C) 144.2, 139.1, 130.3, 130.0, 126.4, 125.2, 121.0, 87.5, 79.4, 74.1, 27.9, 3.3; HRMS (ESI+) calcd for C<sub>13</sub>H<sub>12</sub>BrNO [M+H]<sup>+</sup> 278.0181, found 278.0176

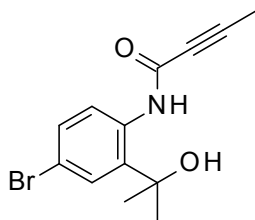

***N*-[4-bromo-2-(1-hydroxy-1-methyl-ethyl)phenyl]but-2-ynamide:** Methylmagnesium bromide (3M in Et<sub>2</sub>O) (2.6 mL, 7.80 mmol) was added dropwise to methyl 2-amino-5-bromobenzoate (358 mg, 1.56 mmol) in THF (10 mL) at 0 °C under nitrogen. The resulting solution was warmed to rt and stirred for 30 minutes. The reaction mixture was quenched with water (10 mL), brine (20 mL) added and extracted with EtOAc (2 x 25 mL). The organic layer was dried over a phase separating cartridge, filtered and evaporated to afford the crude as pale yellow solid (362 mg) which was used directly without further purification.

Dicyclohexylmethanediimine (338 mg, 1.64 mmol) was added to 2-(2-amino-5-bromophenyl)propan-2-ol (359 mg) and but-2-ynoic acid (138 mg, 1.64 mmol) in DCM (8 mL) under nitrogen. The resulting solution was stirred at rt for 1 hour. The reaction mixture was diluted with Et<sub>2</sub>O (20 mL), and washed sequentially with saturated NaHCO<sub>3</sub> (25 mL) and saturated brine (25 mL). The organic layer was dried with a phase separating cartridge, filtered and evaporated to afford crude product. The crude product was purified by flash silica chromatography, elution gradient 0 to 35% EtOAc in heptane. Pure fractions were evaporated to dryness to afford *N*-(4-bromo-2-(2-hydroxypropan-2-yl)phenyl)but-2-ynamide (302 mg, 65%, over 2 steps) as a white solid. <sup>1</sup>H NMR (400 MHz, DMSO) 1.52 (s, 6H), 2.03 (s, 3H), 6.35 (s, 1H), 7.40 – 7.47 (2H, m), 8.03 (d, *J* = 9.3 Hz, 1H), 10.89 (s, 1H); <sup>13</sup>C NMR (101 MHz, DMSO, 30 °C) 149.7, 138.9, 135.5, 130.0, 128.3, 123.7, 116.0, 84.4, 75.7, 72.7, 29.8, 3.0; LRMS *m/z* (ESI-) [M-H]<sup>-</sup> 294.0

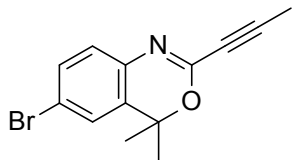

**6-bromo-4,4-dimethyl-2-prop-1-ynyl-3,1-benzoxazine (*p*-Br-5e):** Methanesulfonic acid (0.09 mL, 1.39 mmol) was added to *N*-(4-bromo-2-(2-hydroxypropan-2-yl)phenyl)but-2-ynamide (85 mg, 0.29 mmol) in DCM (6.3 mL) at 25 °C under nitrogen. The resulting solution was warmed to 45 °C and stirred for 2 hours. The reaction mixture was diluted with DCM (5 mL) and washed sequentially with saturated NaHCO<sub>3</sub> (25 mL) and saturated brine (10 mL). The organic layer was dried with a phase separating cartridge, filtered and evaporated to afford crude product. The crude product was purified by flash silica chromatography, elution gradient 0 to 25% EtOAc in heptane. Pure fractions were evaporated to dryness to afford 6-bromo-4,4-dimethyl-2-(prop-1-yn-1-yl)-4H-benzo[d][1,3]oxazine (15.6 mg, 20%) as a colorless oil. <sup>1</sup>H NMR (400 MHz, DMSO) 1.58 (s, 6H), 2.05 (s, 3H), 7.00 (d, *J* = 8.3 Hz, 1H), 7.46 (dd, *J* = 8.3, 2.2 Hz, 1H), 7.51 (d, *J* = 2.2 Hz, 1H); <sup>13</sup>C NMR (101 MHz, DMSO, 30 °C) 143.5, 136.6, 133.2, 131.5, 126.2, 125.9, 119.6, 87.2, 79.0, 74.2, 27.9, 3.3; HRMS (ESI+) calcd for C<sub>13</sub>H<sub>12</sub>BrNO [M+H]<sup>+</sup> 278.0181, found 278.0176

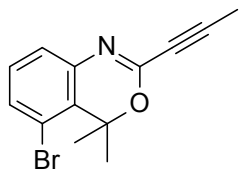

**5-bromo-4,4-dimethyl-2-prop-1-ynyl-3,1-benzoxazine (*m'*-Br-5e):** Methylmagnesium bromide (3M in Et<sub>2</sub>O) (2.6 mL, 7.80 mmol) was added dropwise to methyl 2-amino-6-bromobenzoate (0.363 g, 1.58 mmol) in THF (10 mL) at 0 °C under nitrogen. The resulting solution was warmed to rt and stirred for 30 minutes. The reaction mixture was quenched with water (10 mL), brine (20 mL) added and extracted with EtOAc (2 x 25 mL). The organic layer was dried over a phase separating cartridge, filtered and evaporated to afford the crude as yellow oil (368 mg) which was used directly without further purification.

Dicyclohexylmethanediimine (0.338 g, 1.64 mmol) was added to 2-(2-amino-6-bromophenyl)propan-2-ol (364 mg) and but-2-ynoic acid (139 mg, 1.66 mmol) in DCM (8 mL) under nitrogen. The resulting solution was stirred at rt for 1 hour. The reaction mixture was diluted with Et<sub>2</sub>O (20 mL), and washed sequentially with saturated NaHCO<sub>3</sub> (25 mL) and saturated brine (25 mL). The organic layer was dried with a phase separating cartridge, filtered and evaporated to afford crude product. The crude product was purified by flash silica chromatography, elution gradient 0 to 35% EtOAc in heptane. Fractions containing product were evaporated to dryness to afford impure *N*-(3-bromo-2-(2-hydroxypropan-2-yl)phenyl)but-2-ynamide (85 mg) as a pale yellow solid.

Methanesulfonic acid (0.07 mL, 1.08 mmol) was added to *N*-(3-bromo-2-(2-hydroxypropan-2-yl)phenyl)but-2-ynamide (80 mg) in DCM (4.4 mL) under nitrogen. The resulting solution was warmed to 45 °C and stirred for 2 hours. The reaction mixture was diluted with DCM (5 mL) and washed sequentially with saturated NaHCO<sub>3</sub> (25 mL) and



saturated brine (10 mL). The organic layer was dried with a phase separating cartridge, filtered and evaporated to afford crude product. The crude product was purified by flash silica chromatography, elution gradient 0 to 35% EtOAc in heptane. Pure fractions were evaporated to dryness to afford 5-bromo-4,4-dimethyl-2-(prop-1-yn-1-yl)-4H-benzo[d][1,3]oxazine (26.5 mg, 6%, over 3 steps) as a white waxy solid.  $^1\text{H}$  NMR (400 MHz, DMSO) 1.79 (s, 6H), 2.06 (s, 3H), 7.09 (dd,  $J = 7.9, 1.3$  Hz, 1H), 7.20 (t,  $J = 7.9$  Hz, 1H), 7.48 (dd,  $J = 7.9, 1.3$  Hz, 1H);  $^{13}\text{C}$  NMR (101 MHz, DMSO, 30 °C) 142.8, 139.5, 133.4, 130.0, 129.2, 124.9, 117.5, 87.4, 80.9, 73.9, 28.0, 3.3; HRMS (ESI+) calcd for  $\text{C}_{13}\text{H}_{12}\text{BrNO}$   $[\text{M}+\text{H}]^+$  278.0181, found 278.0176

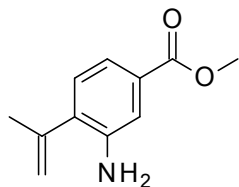

**methyl 3-amino-4-isopropenylbenzoate:** Pd(dppf) $\text{Cl}_2$  (71 mg, 0.09 mmol) was added to a degassed solution of methyl 3-amino-4-bromobenzoate (200 mg, 0.87 mmol), 4,4,5,5-tetramethyl-2-(prop-1-en-2-yl)-1,3,2-dioxaborolane (0.33 mL, 1.74 mmol) and cesium carbonate (850 mg, 2.61 mmol) in 1,4-dioxane (4 mL) and water (0.4 mL) under nitrogen. The resulting solution was warmed to 100 °C and stirred for 18 hours. The reaction mixture was diluted with EtOAc (40 mL) and washed sequentially with saturated  $\text{NaHCO}_3$  (50 mL) and saturated brine (50 mL). The organic layer was dried with a phase separating cartridge, filtered and evaporated to afford crude product. The crude product was purified by flash silica chromatography, elution gradient 0 to 40% EtOAc in heptane. Pure fractions were evaporated to dryness to afford methyl 3-amino-4-(prop-1-en-2-yl)benzoate (33.7 mg, 20%) as a pale yellow oil.  $^1\text{H}$  NMR (400 MHz, DMSO) 1.99 – 2.08 (m, 3H), 3.81 (s, 3H), 5.03 (dd,  $J = 1.7, 0.9$  Hz, 1H), 5.08 (s, 2H), 5.28 (dq,  $J = 1.7$  Hz, 1H), 7.03 (d,  $J = 7.9$  Hz, 1H), 7.12 (dd,  $J = 7.9, 1.7$  Hz, 1H), 7.32 (d,  $J = 1.7$  Hz, 1H);  $^{13}\text{C}$  NMR (101 MHz, DMSO, 30 °C) 166.5, 144.9, 142.5, 131.9, 128.8, 128.1, 116.6, 115.7, 115.3, 51.8, 22.8; LRMS  $m/z$  (ESI+)  $[\text{M}+\text{H}]^+$  192.1

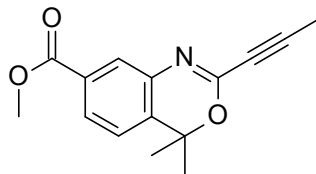

**methyl 4,4-dimethyl-2-prop-1-ynyl-3,1-benzoxazine-7-carboxylate (*m*-CO<sub>2</sub>Me-5e):**

Dicyclohexylmethanediimine (37.2 mg, 0.18 mmol) was added to methyl 3-amino-4-(prop-1-en-2-yl)benzoate (30.1 mg, 0.16 mmol) and but-2-ynoic acid (15.2 mg, 0.18 mmol) in DCM (1 mL) under nitrogen. The resulting solution was stirred at rt for 2 hours. The reaction mixture was diluted with  $\text{Et}_2\text{O}$  (20 mL) and washed sequentially with saturated  $\text{NaHCO}_3$  (25 mL) and saturated brine (25 mL). The organic layer was dried with a phase separating cartridge, filtered

and evaporated to afford crude product. The crude product was purified by flash silica chromatography, elution gradient 0 to 40% EtOAc in heptane. Fractions containing product were evaporated to dryness to afford crude methyl 3-(but-2-ynamido)-4-(prop-1-en-2-yl)benzoate (49.0 mg) as a pale yellow waxy solid.

Methanesulfonic acid (0.05 mL, 0.77 mmol) was added to methyl 3-(but-2-ynamido)-4-(prop-1-en-2-yl)benzoate (49 mg) in DCM (3.5 mL) under nitrogen. The resulting solution was warmed to 45 °C and stirred for 30 minutes. The reaction mixture was quenched with saturated NaHCO<sub>3</sub> (10 mL) and extracted with DCM (2 x 10 mL). The organic layer was dried over a phase separating cartridge, filtered and evaporated to afford pale yellow oil. The crude product was purified by flash silica chromatography, elution gradient 0 to 30% EtOAc in heptane. Pure fractions were evaporated to dryness to afford methyl 4,4-dimethyl-2-(prop-1-yn-1-yl)-4*H*-benzo[d][1,3]oxazine-7-carboxylate (20.7 mg, 50%, over 2 steps) as a colorless oil which solidified on standing. <sup>1</sup>H NMR (400 MHz, DMSO) 1.61 (s, 6H), 2.07 (s, 3H), 3.85 (s, 3H), 7.44 (d, *J* = 8.0 Hz, 1H), 7.55 (d, *J* = 1.7 Hz, 1H), 7.81 (dd, *J* = 8.0, 1.7 Hz, 1H); <sup>13</sup>C NMR (101 MHz, DMSO, 30 °C) 165.5, 144.0, 137.7, 135.8, 130.1, 128.1, 124.4, 123.7, 87.4, 79.4, 74.2, 52.2, 27.9, 3.4; HRMS (ESI+) calcd for C<sub>15</sub>H<sub>15</sub>NO<sub>3</sub> [M+H]<sup>+</sup> 258.1130, found 258.1135

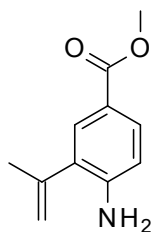

**methyl 4-amino-3-isopropenylbenzoate:** Pd(dppf)Cl<sub>2</sub> (106 mg, 0.13 mmol) was added to a degassed solution of methyl 4-amino-3-bromobenzoate (300 mg, 1.30 mmol), 4,4,5,5-tetramethyl-2-(prop-1-en-2-yl)-1,3,2-dioxaborolane (0.49 mL, 2.61 mmol) and cesium carbonate (1.27 g, 3.91 mmol) in 1,4-dioxane (6 mL) and water (0.6 mL) under nitrogen. The resulting solution was warmed to 80 °C and stirred for 4 hours. The reaction mixture was diluted with EtOAc (40 mL), and washed sequentially with saturated NaHCO<sub>3</sub> (50 mL) and saturated brine (50 mL). The organic layer was dried with a phase separating cartridge, filtered and evaporated to afford crude product. The crude product was purified by flash silica chromatography, elution gradient 0 to 40% EtOAc in heptane. Pure fractions were evaporated to dryness to afford methyl 4-amino-3-(prop-1-en-2-yl)benzoate (103 mg, 41%) as an orange oil. <sup>1</sup>H NMR (400 MHz, DMSO) 2 – 2.02 (m, 3H), 3.74 (s, 3H), 4.99 (dq, *J* = 1.7, 0.9 Hz, 1H), 5.26 (dq, *J* = 3.1, 1.7 Hz, 1H), 5.65 (s, 2H), 6.68 (d, *J* = 8.5 Hz, 1H), 7.50 (d, *J* = 2.1 Hz, 1H), 7.57 (dd, *J* = 8.5, 2.1 Hz, 1H); <sup>13</sup>C NMR (126 MHz, DMSO, 27 °C) 166.3, 149.5, 142.4, 129.7, 129.5, 126.5, 116.0, 115.8, 113.8, 51.2, 23.0; LRMS *m/z* (ESI+) [M+H]<sup>+</sup> 192.1.

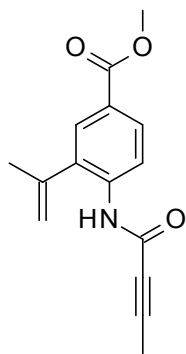

**methyl 4-(but-2-ynoylamino)-3-isopropenylbenzoate:** Dicyclohexylmethanediimine (122 mg, 0.59 mmol) was added to methyl 4-amino-3-(prop-1-en-2-yl)benzoate (98 mg, 0.51 mmol) and but-2-ynoic acid (49.5 mg, 0.59 mmol) in DCM (3.4 mL) under nitrogen. The resulting solution was stirred at rt for 2 hours. The reaction was incomplete and further but-2-ynoic acid (49.5 mg, 0.59 mmol) and dicyclohexylmethanediimine (122 mg, 0.59 mmol) were added and the solution was stirred at rt for a further 5 hours. The reaction mixture was diluted with Et<sub>2</sub>O (25 mL) and washed sequentially with saturated NaHCO<sub>3</sub> (25 mL) and saturated brine (25 mL). The organic layer was dried with a phase separating cartridge, filtered and evaporated to afford crude product. The crude product was purified by flash silica chromatography, elution gradient 0 to 40% EtOAc in heptane. Pure fractions were evaporated to dryness to afford methyl 4-(but-2-ynamido)-3-(prop-1-en-2-yl)benzoate (128 mg, 97%) as a pale yellow waxy solid. <sup>1</sup>H NMR (400 MHz, DMSO) 1.99 – 2.06 (m, 6H), 3.84 (s, 3H), 4.93 – 5 (m, 1H), 5.26 (dq, *J* = 1.5 Hz, 1H), 7.61 (d, *J* = 8.3 Hz, 1H), 7.77 (d, *J* = 2.1 Hz, 1H), 7.84 (dd, *J* = 8.3, 2.1 Hz, 1H), 9.96 (s, 1H); <sup>13</sup>C NMR (126 MHz, CDCl<sub>3</sub>, 27 °C) 166.6, 151.0, 141.9, 137.8, 132.6, 129.8, 129.4, 125.6, 120.2, 118.2, 85.3, 75.4, 52.2, 24.6, 4.0; LRMS *m/z* (ESI+) [M+H]<sup>+</sup> 258.1.

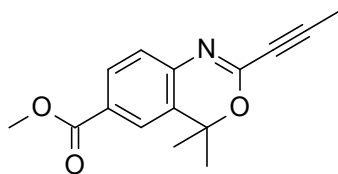

**methyl 4,4-dimethyl-2-prop-1-ynyl-3,1-benzoxazine-6-carboxylate (p-CO<sub>2</sub>Me-5e):**

Methanesulfonic acid (0.16 mL, 2.46 mmol) was added to methyl 4-(but-2-ynamido)-3-(prop-1-en-2-yl)benzoate (123 mg, 0.48 mmol) in DCM (10.5 mL) under nitrogen. The resulting solution was warmed to 45 °C and stirred for 90 minutes. The reaction mixture was quenched with saturated NaHCO<sub>3</sub> (25 mL) and extracted with DCM (2 x 15 mL). The organic layer was dried over a phase separating cartridge, filtered and evaporated to afford yellow oil. The crude product was purified by flash silica chromatography, elution gradient 0 to 30% EtOAc in heptane. Pure fractions were evaporated to dryness to afford methyl 4,4-dimethyl-2-(prop-1-yn-1-yl)-4*H*-benzo[d][1,3]oxazine-6-carboxylate (85 mg, 69%) as a white powder. <sup>1</sup>H NMR (400 MHz, DMSO) 1.62 (s, 6H), 2.07 (s, 3H), 3.85 (s, 3H), 7.17

(d,  $J = 8.2$  Hz, 1H), 7.81 (d,  $J = 1.8$  Hz, 1H), 7.87 (dd,  $J = 8.2, 1.8$  Hz, 1H);  $^{13}\text{C}$  NMR (101 MHz, DMSO, 30 °C) 165.5, 145.0, 141.4, 131.3, 129.8, 128.3, 124.4, 124.1, 88.0, 79.6, 74.2, 52.1, 27.9, 3.4; HRMS (ESI+) calcd for  $\text{C}_{15}\text{H}_{15}\text{NO}_3$   $[\text{M}+\text{H}]^+$  258.1130, found 258.1135

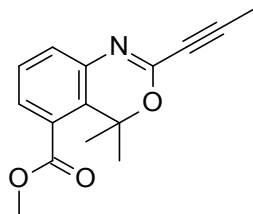

**methyl 4,4-dimethyl-2-prop-1-ynyl-3,1-benzoxazine-5-carboxylate (o'-CO<sub>2</sub>Me-5e):**

$\text{Pd}(\text{dppf})\text{Cl}_2$  (142 mg, 0.22 mmol) was added to a degassed solution of 4,4,5,5-tetramethyl-2-(prop-1-en-2-yl)-1,3,2-dioxaborolane (0.82 mL, 4.35 mmol), cesium carbonate (2.12 g, 6.52 mmol) and methyl 3-amino-2-bromobenzoate (500 mg, 2.17 mmol) in a mixture of dioxane (11 mL) and water (1.1 mL) under nitrogen. The resulting solution was stirred at 95 °C for 2 hours. The reaction mixture was diluted with DCM (25 mL) and washed sequentially with saturated  $\text{NaHCO}_3$  (25 mL) and saturated brine (25 mL). The organic layer was dried with a phase separating cartridge, filtered and evaporated to afford crude product. The crude product was purified by flash silica chromatography, elution gradient 0 to 40% EtOAc in heptane. Fractions containing product were evaporated to dryness to afford impure methyl 3-amino-2-(prop-1-en-2-yl)benzoate (245 mg) as a brown oil which was used immediately in the next reaction.

Dicyclohexylmethanediimine (300 mg, 1.46 mmol) was added to methyl 3-amino-2-(prop-1-en-2-yl)benzoate (242 mg) and but-2-ynoic acid (122 mg, 1.46 mmol) in DCM (8.5 mL) under nitrogen. The resulting solution was stirred at rt for 2 hours. The reaction mixture was diluted with  $\text{Et}_2\text{O}$  (20 mL), filtered and evaporated to afford crude product (88 mg) as a pale pink waxy solid which was used without further purification.

Methanesulfonic acid (0.10 mL, 1.54 mmol) was added to methyl 3-(but-2-ynamido)-2-(prop-1-en-2-yl)benzoate (80 mg) in DCM (6.9 mL) under nitrogen. The resulting solution was stirred at 45 °C for 40 minutes. The reaction mixture was quenched with saturated  $\text{NaHCO}_3$  (20 mL) and extracted with DCM (2 x 20 mL). The organic layer was dried over a phase separating cartridge, filtered and evaporated to afford pale yellow oil. The crude product was purified by flash silica chromatography, elution gradient 0 to 30% EtOAc in heptane. Pure fractions were evaporated to dryness to afford methyl 4,4-dimethyl-2-(prop-1-yn-1-yl)-4*H*-benzo[d][1,3]oxazine-5-carboxylate (34.4 mg, 6%, over 3 steps) as a white waxy solid.  $^1\text{H}$  NMR (400 MHz, DMSO) 1.61 (s, 6H), 2.07 (s, 3H), 3.86 (s, 3H), 7.23 (dd,  $J = 7.5, 1.7$  Hz, 1H), 7.31 – 7.44 (m, 2H);  $^{13}\text{C}$  NMR (126 MHz, DMSO, 27 °C) 169.5, 143.8, 138.6, 129.4, 128.7, 128.7, 127.5, 127.0, 87.7, 79.7, 74.0, 52.8, 26.7, 3.4; HRMS (ESI+) calcd for  $\text{C}_{15}\text{H}_{15}\text{NO}_3$   $[\text{M}+\text{H}]^+$  258.1130, found 258.1135

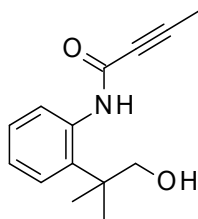

***N*-[2-(2-hydroxy-1,1-dimethyl-ethyl)phenyl]but-2-ynamide:** Dicyclohexylmethanediimine (1.25 g, 6.06 mmol) was added to a solution of 2-(2-aminophenyl)-2-methylpropan-1-ol (920 mg, 5.57 mmol) and but-2-ynoic acid (472 mg, 5.61 mmol) in DCM (28 mL) at rt under nitrogen. The resulting solution was stirred at rt for 1 hour. The reaction mixture was filtered and the solvent removed under vacuum to afford the crude as a brown oil. The crude product was purified by flash silica chromatography, elution gradient 25 to 60% EtOAc in heptane. Pure fractions were evaporated to dryness to afford *N*-(2-(1-hydroxy-2-methylpropan-2-yl)phenyl)but-2-ynamide (898 mg, 70%) as a pale yellow foam. <sup>1</sup>H NMR (400 MHz, DMSO) 1.31 (s, 6H), 2.02 (s, 3H), 3.51 (d, *J* = 4.5 Hz, 2H), 5.93 (t, *J* = 4.5 Hz, 1H), 7.14 (td, *J* = 7.7, 1.5 Hz, 1H), 7.20 (td, *J* = 7.7, 1.4 Hz, 1H), 7.38 (dd, *J* = 7.7, 1.5 Hz, 1H), 7.44 (dd, *J* = 7.7, 1.4 Hz, 1H), 10.83 (s, 1H); <sup>13</sup>C NMR (101 MHz, DMSO, 30 °C) 150.7, 140.3, 135.7, 127.5, 126.9, 126.3, 125.5, 83.6, 75.9, 71.6, 25.6, 3.1; LRMS *m/z* (ESI+) [*M*+H]<sup>+</sup> 231.2

2-(2-aminophenyl)-2-methylpropan-1-ol was synthesised according to literature procedure.<sup>15</sup>

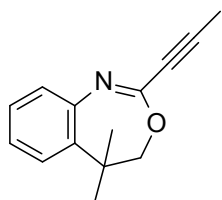

**5,5-dimethyl-2-prop-1-ynyl-4H-3,1-benzoxazepine (6):** Methanesulfonyl chloride (0.075 mL, 0.97 mmol) was added dropwise to *N*-(2-(1-hydroxy-2-methylpropan-2-yl)phenyl)but-2-ynamide (210 mg, 0.91 mmol) and triethylamine (0.38 mL, 2.72 mmol) in DCM (17 mL) under nitrogen. The resulting solution was stirred at rt for 1 hour. The reaction mixture was quenched with half saturated NaHCO<sub>3</sub> (20 mL), the organic layer was dried over a phase separating cartridge, filtered and evaporated to afford brown oil. The crude product was purified by flash silica chromatography, elution gradient 15 to 30% EtOAc in heptane. Pure fractions were evaporated to dryness to afford 5,5-dimethyl-2-(prop-1-yn-1-yl)-4,5-dihydrobenzo[d][1,3]oxazepine (63.2 mg, 33%) as a white solid. <sup>1</sup>H NMR (400 MHz, DMSO) 1.31 (s, 6H), 2.09 (s, 3H), 3.99 (s, 2H), 7.08 (td, *J* = 7.4, 1.2 Hz, 1H), 7.19 (td, *J* = 7.8, 1.2 Hz, 1H), 7.27 – 7.3 (m, 1H), 7.92 (d, *J* = 7.8 Hz, 1H); <sup>13</sup>C NMR (101 MHz, DMSO, 30 °C) 150.5, 141.7, 140.3, 127.3, 124.5, 122.5, 116.1, 89.5, 74.5, 63.1, 42.9, 28.0, 3.4; HRMS (ESI+) calcd for C<sub>14</sub>H<sub>15</sub>NO [*M*+H]<sup>+</sup> 214.1232, found 214.1227.

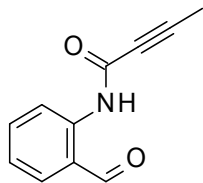

***N*-(2-formylphenyl)but-2-ynamide:** Manganese(IV) oxide (1.61 g, 18.5 mmol) was added to *N*-(2-(hydroxymethyl)phenyl)but-2-ynamide (350 mg, 1.85 mmol) in DCM (12.5 mL) under nitrogen. The resulting suspension was stirred at rt for 17 hours. The reaction mixture was filtered through celite and washed with DCM (50 mL). The solvent was removed under vacuum to afford *N*-(2-formylphenyl)but-2-ynamide (329 mg, 95%) as a yellow solid. <sup>1</sup>H NMR (400 MHz, DMSO) 2.08 (s, 3H), 7.37 (td, *J* = 7.5, 1.1 Hz, 1H), 7.69 (ddd, *J* = 8.3, 7.5, 1.6 Hz, 1H), 7.90 (dd, *J* = 7.5, 1.6 Hz, 1H), 8.10 (d, *J* = 8.3 Hz, 1H), 9.98 (s, 1H), 11.14 (s, 1H); <sup>13</sup>C NMR (101 MHz, DMSO, 30 °C) 194.3, 151.1, 138.8, 135.4, 133.5, 124.6, 121.4, 121.3, 85.9, 75.2, 3.1; LRMS *m/z* (ESI+) [M+H]<sup>+</sup> 188.2

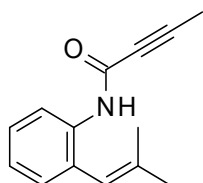

***N*-[2-(2-methylprop-1-enyl)phenyl]but-2-ynamide:** *n*-Butyllithium (1.6 M in hexane) (2.24 mL, 3.58 mmol) was added dropwise to isopropyltriphenylphosphonium iodide (1.62 g, 3.75 mmol) in THF (10 mL) at 0 °C under nitrogen. The resulting solution was stirred at for 30 minutes. A solution of *N*-(2-formylphenyl)but-2-ynamide (319 mg, 1.70 mmol) in THF (8 mL) was subsequently added and the resultant suspension warmed to rt and stirred for 3.5 hours. The reaction mixture was quenched with saturated NH<sub>4</sub>Cl (25 mL) and extracted with EtOAc (2 x 20 mL). The organic layer was dried over a phase separating cartridge, filtered and evaporated to afford orange oil. The crude product was purified by flash silica chromatography, elution gradient 0 to 30% EtOAc in heptane. Pure fractions were evaporated to dryness to afford *N*-(2-(2-methylprop-1-en-1-yl)phenyl)but-2-ynamide (182 mg, 50%) as an orange oil which solidified upon standing. <sup>1</sup>H NMR (400 MHz, DMSO) 1.67 (s, 3H), 1.87 (d, *J* = 1.3 Hz, 3H), 2.02 (s, 3H), 6.21 (s, 1H), 7.1 – 7.29 (m, 3H), 7.41 (d, *J* = 7.5 Hz, 1H), 9.74 (s, 1H); <sup>13</sup>C NMR (101 MHz, DMSO, 30 °C) 150.9, 136.1, 134.6, 132.5, 129.8, 126.5, 125.3, 125.2, 121.3, 83.9, 75.8, 26.2, 19.2, 3.2; LRMS *m/z* (ESI+) [M+H]<sup>+</sup> 214.2

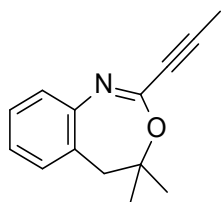

**4,4-dimethyl-2-prop-1-ynyl-5H-3,1-benzoxazepine (7):** Methanesulfonic acid (0.23 mL, 3.54 mmol) was added to *N*-(2-(2-methylprop-1-en-1-yl)phenyl)but-2-ynamide (151 mg, 0.71 mmol) in DCM (15.5 mL) under nitrogen. The resulting solution was warmed to 45 °C and stirred for 1.5 hours. The reaction mixture was quenched with saturated NaHCO<sub>3</sub> (25 mL) and extracted with DCM (2 x 15 mL). The organic layer was dried over a phase separating cartridge, filtered and evaporated to afford pale yellow oil. The crude product was purified by flash silica chromatography, elution gradient 0 to 20% EtOAc in heptane. Pure fractions were evaporated to dryness to afford 4,4-dimethyl-2-(prop-1-yn-1-yl)-4,5-dihydrobenzo[d][1,3]oxazepine (83 mg, 55%) as a colorless oil. <sup>1</sup>H NMR (400 MHz, DMSO) 1.24 (s, 6H), 1.98 (s, 3H), 2.97 (s, 2H), 7.08 – 7.17 (m, 3H), 7.21 – 7.27 (m, 1H); <sup>13</sup>C NMR (101 MHz, DMSO, 30 °C) 143.0, 138.5, 132.3, 129.6, 127.3, 127.2, 125.4, 86.4, 80.8, 77.5, 45.3, 28.0, 3.1; HRMS (ESI+) calcd for C<sub>14</sub>H<sub>15</sub>NO [M+H]<sup>+</sup> 214.1232, found 214.1227.

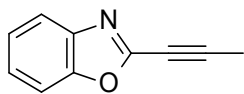

**2-prop-1-ynyl-1,3-benzoxazole (8):** trimethyl(prop-1-yn-1-yl)silane (0.26 mL, 1.79 mmol) and TBAF (1M in THF) (1.8 mL, 1.80 mmol) were added to 2-chlorobenzo[d]oxazole (250 mg, 1.63 mmol), Pd(PPh<sub>3</sub>)<sub>4</sub> (94 mg, 0.08 mmol), copper(I) iodide (93 mg, 0.49 mmol) and triethylamine (0.68 mL, 4.88 mmol) in toluene (13 mL) under nitrogen. The resulting solution was stirred at rt for 24 hours. The reaction mixture was diluted with DCM (20 mL) and washed with saturated NH<sub>4</sub>Cl (50 mL). The organic layer was dried with a phase separating cartridge, filtered and evaporated to afford crude product. The crude product was purified by flash silica chromatography, elution gradient 0 to 30% EtOAc in heptane. Pure fractions were evaporated to dryness to afford 2-(prop-1-yn-1-yl)benzo[d]oxazole (33.6 mg, 13%) as a pale yellow solid. <sup>1</sup>H NMR (400 MHz, DMSO) 2.23 (s, 3H), 7.42 (td, *J* = 7.7, 1.3 Hz, 1H), 7.45 – 7.51 (m, 1H), 7.71 (ddd, *J* = 8.1, 1.3, 0.6 Hz, 1H), 7.76 (ddd, *J* = 7.7, 1.3, 0.6 Hz, 1H); <sup>13</sup>C NMR (101 MHz, DMSO, 30 °C) 149.4, 146.7, 140.1, 126.5, 125.2, 119.9, 110.7, 93.6, 68.3, 3.8; HRMS (ESI+) calcd for C<sub>10</sub>H<sub>7</sub>ON [M+H]<sup>+</sup> 158.0606, found 158.0601.

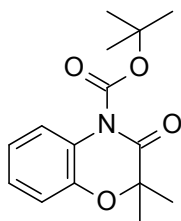

**tert-butyl 2,2-dimethyl-3-oxo-1,4-benzoxazine-4-carboxylate:** Di-*tert*-butyl dicarbonate (1.92 g, 8.80 mmol) was added to 2,2-dimethyl-2H-benzo[b][1,4]oxazin-3(4H)-one (1.30 g, 7.34 mmol), triethylamine (1.03 mL, 7.41 mmol) and *N,N*-dimethylpyridin-4-amine (0.090 g, 0.73 mmol) in DCM (23 mL) under nitrogen. The resulting solution was stirred at rt for 18 hours. The reaction mixture was diluted with DCM (15 mL) and washed sequentially with saturated NaHCO<sub>3</sub> (2 x 50 mL) and saturated brine (50 mL). The organic layer was dried with a phase separating cartridge,

filtered and evaporated to afford crude product. The crude product was purified by flash silica chromatography, elution gradient 0 to 20% EtOAc in heptane. Pure fractions were evaporated to dryness to afford *tert*-butyl 2,2-dimethyl-3-oxo-2,3-dihydro-4H-benzo[b][1,4]oxazine-4-carboxylate (1.85 g, 91%) as a colorless oil. <sup>1</sup>H NMR (400 MHz, CDCl<sub>3</sub>) 1.51 (s, 6H), 1.62 (s, 9H), 6.96 – 7.08 (m, 4H); <sup>13</sup>C NMR (101 MHz, CDCl<sub>3</sub>, 30 °C) 167.9, 150.5, 143.1, 126.7, 125.2, 122.5, 118.3, 116.8, 85.8, 78.2, 27.8, 23.5; LRMS *m/z* (ESI-) [M+H]<sup>+</sup> 278.0

2,2-dimethyl-2H-benzo[b][1,4]oxazin-3(4H)-one was synthesised according to literature procedure.<sup>16</sup>

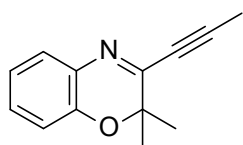

**2,2-dimethyl-3-prop-1-ynyl-1,4-benzoxazine (9):** Prop-1-yn-1-ylmagnesium bromide (0.5 M in THF) (3.6 mL, 1.80 mmol) was added dropwise to *tert*-butyl 2,2-dimethyl-3-oxo-2,3-dihydro-4H-benzo[b][1,4]oxazine-4-carboxylate (450 mg, 1.62 mmol) in THF (7 mL) at -78 °C under nitrogen. The resulting solution was stirred at -78 °C for 2 hours before gradual warming to rt and stirring for 1 hour. The reaction mixture was quenched with water (15 mL) and extracted with EtOAc (2 x 15 mL). The organic layer was dried over a phase separating cartridge, filtered and evaporated to afford crude *tert*-butyl (2-((2-methyl-3-oxohex-4-yn-2-yl)oxy)phenyl)carbamate (475 mg) as a pale yellow oil which was used directly in the next reaction.

Methanesulfonic acid (0.045 mL, 0.69 mmol) was added to crude *tert*-butyl (2-((2-methyl-3-oxohex-4-yn-2-yl)oxy)phenyl)carbamate (120 mg, 0.38 mmol) in DCM (7.5 mL) at 0 °C under nitrogen. The resulting solution was stirred at 0 °C for 1 hour. The reaction mixture was quenched with saturated NaHCO<sub>3</sub> (15 mL) and extracted with DCM (2 x 10 mL). The organic layer was dried over a phase separating cartridge, filtered and evaporated to afford yellow oil. The crude product was purified by flash silica chromatography, elution gradient 0 to 30% EtOAc in heptane. Pure fractions were evaporated to dryness to afford 2,2-dimethyl-3-(prop-1-yn-1-yl)-2H-benzo[b][1,4]oxazine (40.6 mg, 54%, over 2 steps) as a yellow oil which solidified on standing. <sup>1</sup>H NMR (400 MHz, DMSO) 1.44 (s, 6H), 2.12 (s, 3H), 6.87 (dd, *J* = 8.0, 1.3 Hz, 1H), 6.98 (td, *J* = 7.7, 1.3 Hz, 1H), 7.12 – 7.21 (m, 1H), 7.23 (dd, *J* = 7.7, 1.6 Hz, 1H); <sup>13</sup>C NMR (101 MHz, DMSO, 30 °C) 152.7, 144.9, 132.4, 129.4, 126.6, 122.0, 116.2, 93.9, 76.7, 74.3, 24.0, 4.0; HRMS (ESI+) calcd for C<sub>13</sub>H<sub>13</sub>NO [M+H]<sup>+</sup> 200.1075, found 200.1082



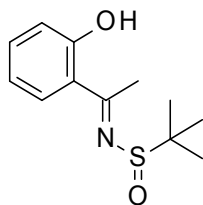

***N*-[1-(2-hydroxyphenyl)ethylidene]-2-methylpropane-2-sulfinamide:** Tetraethoxytitanium (5.96 mL, 28.4 mmol) was added dropwise to 1-(2-hydroxyphenyl)ethan-1-one (1.8 mL, 14.9 mmol) and 2-methylpropane-2-sulfinamide (3.62 g, 29.9 mmol) in THF (30 mL) under nitrogen. The resulting solution was warmed to 65 °C and stirred for 90 minutes. The reaction was cooled to rt and diluted with EtOAc (30 mL), quenched with water (50 mL) and extracted with EtOAc (2 x 25 mL). The combined organic layers were dried over a phase separating cartridge, filtered and evaporated to afford yellow oil. The crude product was purified by flash silica chromatography, elution gradient 20 to 50% EtOAc in heptane. Pure fractions were evaporated to dryness to afford *N*-(1-(2-hydroxyphenyl)ethylidene)-2-methylpropane-2-sulfinamide (1.33 g, 37%) as a yellow solid. <sup>1</sup>H NMR (400 MHz, DMSO) 1.22 (s, 9H), 2.78 (s, 3H), 6.91 – 7 (m, 2H), 7.42 – 7.51 (m, 1H), 7.79 (dd, *J* = 8.3, 1.3 Hz, 1H), 12.93 (s, 1H); <sup>13</sup>C NMR (101 MHz, DMSO, 30 °C) 182.2, 160.4, 134.6, 130.3, 120.0, 119.0, 117.6, 56.3, 21.5, 20.7; LRMS *m/z* (ESI+) [*M*+*H*]<sup>+</sup> 240.3

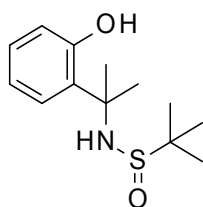

***N*-[1-(2-hydroxyphenyl)-1-methyl-ethyl]-2-methylpropane-2-sulfinamide:** Methylmagnesium bromide (3.5 mL, 10.5 mmol) was added dropwise to *N*-(1-(2-hydroxyphenyl)ethylidene)-2-methylpropane-2-sulfinamide (500 mg, 2.09 mmol) in THF (10.5 mL) at -10 °C under nitrogen. The resulting solution was stirred at -10 °C for 30 minutes before warming to rt and stirring for 4 hours. The reaction mixture was quenched with half sat. aq. NH<sub>4</sub>Cl (20 mL) and extracted with EtOAc (2 x 25 mL). The organic layer was dried over a phase separating cartridge, filtered and evaporated to afford *N*-(2-(2-hydroxyphenyl)propan-2-yl)-2-methylpropane-2-sulfinamide (534 mg, quant.) as a yellow solid. <sup>1</sup>H NMR (400 MHz, DMSO) 1.10 (s, 9H), 1.58 (s, 3H), 1.63 (s, 3H), 5.55 (s, 1H), 6.76 (td, *J* = 7.6, 1.3 Hz, 1H), 6.80 (dd, *J* = 8.0, 1.3 Hz, 1H), 7.07 (ddd, *J* = 8.0, 7.6, 1.6 Hz, 1H), 7.27 (dd, *J* = 7.6, 1.6 Hz, 1H), 9.74 (s, 1H); <sup>13</sup>C NMR (101 MHz, DMSO, 30 °C) 154.7, 132.6, 127.8, 126.0, 118.9, 116.3, 57.2, 54.7, 28.6, 28.4, 22.3; LRMS *m/z* (ESI-) [*M*-*H*]<sup>-</sup> 254.2

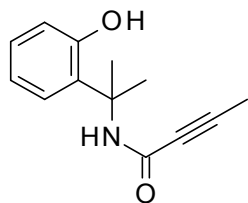

***N*-[1-(2-hydroxyphenyl)-1-methyl-ethyl]but-2-ynamide:** Hydrogen chloride (2M in Et<sub>2</sub>O) (2.1 mL, 8.40 mmol) was added to *N*-(2-(2-hydroxyphenyl)propan-2-yl)-2-methylpropane-2-sulfinamide (520 mg, 2.04 mmol) in MeOH (2 mL) under nitrogen. The resulting solution was stirred at rt for 1 hours. Heptane was added (50 mL) and the precipitate was collected by filtration, washed with heptane (20 mL) and dried under vacuum to afford 2-(2-aminopropan-2-yl)phenol.HCl (253 mg, 66%) as a white solid, which was used without further purification.

Dicyclohexylmethanediiimine (289 mg, 1.40 mmol) was added to 2-(2-aminopropan-2-yl)phenol.HCl (250 mg, 1.33 mmol), but-2-ynoic acid (112 mg, 1.33 mmol) and *N*-ethyl-*N*-isopropylpropan-2-amine (0.23 mL, 1.33 mmol) in DCM (8 mL) at 25 °C under nitrogen. The resulting solution was stirred at rt for 2 hours. 1H-benzo[d][1,2,3]triazol-1-ol hydrate (206 mg, 1.35 mmol) was added and the resultant stirred for 3 hours. The reaction mixture was diluted with DCM (25 mL) and washed sequentially with saturated NaHCO<sub>3</sub> (2 x 30 mL) and saturated brine (50 mL). The organic layer was dried with a phase separating cartridge, filtered and evaporated to afford crude product. The crude product was purified by flash silica chromatography, elution gradient 30 to 60% EtOAc in heptane. Fractions containing product were evaporated to dryness to afford a mixture of product and starting material as a colorless oil. The oil was dissolved in DCM (20 mL) and washed with 2M aq. HCl (30 mL), passed through a phase separator and the solvent removed under vacuum to afford *N*-(2-(2-hydroxyphenyl)propan-2-yl)but-2-ynamide (112 mg, 39%, over 2 steps) as a white foam. <sup>1</sup>H NMR (400 MHz, DMSO) 1.61 (s, 6H), 1.93 (s, 3H), 6.69 (td, *J* = 7.8, 1.2 Hz, 1H), 6.74 (dd, *J* = 7.8, 1.2 Hz, 1H), 7.00 (td, *J* = 7.8, 1.6 Hz, 1H), 7.06 (dd, *J* = 7.8, 1.6 Hz, 1H), 8.28 (s, 1H), 9.31 (s, 1H); <sup>13</sup>C NMR (126 MHz, DMSO, 27 °C) 154.4, 151.4, 131.1, 127.3, 126.7, 118.3, 116.2, 80.5, 76.7, 55.4, 27.1, 3.0; LRMS *m/z* (ESI+) [M+H]<sup>+</sup> 218.2

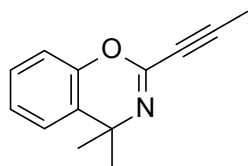

**4,4-dimethyl-2-prop-1-ynyl-1,3-benzoxazine (10):** Trifluoromethanesulfonic anhydride (0.085 mL, 0.51 mmol) was added dropwise to *N*-(2-(2-hydroxyphenyl)propan-2-yl)but-2-ynamide (99.8 mg, 0.46 mmol) in DCM (4.6 mL) at 0 °C under nitrogen. The resulting solution was stirred for 20 minutes before addition of triethylamine (0.15 mL, 1.06 mmol), warming to rt and stirring for 1 hour. The reaction mixture was quenched with saturated NaHCO<sub>3</sub> (20 mL), extracted with EtOAc (2 x 10 mL), the organic layer was dried over a phase separating cartridge, filtered and

evaporated to afford brown oil. The crude product was purified by flash silica chromatography, elution gradient 0 to 30% EtOAc in heptane. Pure fractions were evaporated to dryness to afford 4,4-dimethyl-2-(prop-1-yn-1-yl)-4H-benzo[e][1,3]oxazine (13.9 mg, 15%) as a yellow solid.  $^1\text{H}$  NMR (400 MHz, DMSO) 1.43 (s, 6H), 2.02 (s, 3H), 6.94 (dd,  $J = 8.1, 1.3$  Hz, 1H), 7.16 (td,  $J = 7.5, 1.3$  Hz, 1H), 7.24 (ddd,  $J = 8.1, 7.5, 1.6$  Hz, 1H), 7.34 (dd,  $J = 7.5, 1.6$  Hz, 1H);  $^{13}\text{C}$  NMR (101 MHz, DMSO, 30 °C) 147.0, 136.4, 128.1, 127.3, 125.6, 125.2, 114.8, 84.1, 73.0, 53.1, 32.1, 3.1; HRMS (ESI+) calcd for  $\text{C}_{13}\text{H}_{13}\text{NO}$   $[\text{M}+\text{H}]^+$  200.1075, found 200.1082.

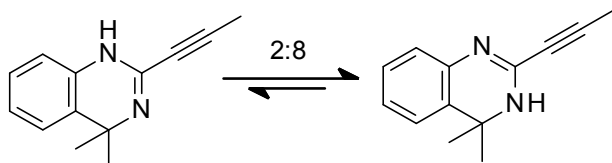

**4,4-dimethyl-2-prop-1-ynyl-3,4-dihydroquinazoline (11):** Dicyclohexylmethanediimine (295 mg, 1.43 mmol) was added to 2-(2-aminopropan-2-yl)aniline (215 mg, 1.43 mmol) and but-2-ynoic acid (120 mg, 1.43 mmol) in DCM (8.9 mL) under nitrogen. The resulting solution was stirred at rt for 3 hours. The reaction mixture was diluted with  $\text{Et}_2\text{O}$  (25 mL), and washed with saturated  $\text{NaHCO}_3$  (25 mL) and saturated brine (25 mL). The organic layer was dried with a phase separating cartridge, filtered and evaporated to afford crude product. The crude product was purified by flash silica chromatography, elution gradient 20 to 70% EtOAc in heptane. Pure fractions were evaporated to dryness to afford 4,4-dimethyl-2-(prop-1-yn-1-yl)-3,4-dihydroquinazoline (152 mg, 54%) as a yellow oil which solidified on standing.  $^1\text{H}$  NMR (400 MHz, DMSO) 1.32 (s, 1.2H), 1.40 (s, 4.8H), 1.99 (s, 0.6H), 2.01 (s, 2.4H), 6.74 (dd,  $J = 7.9, 1.2$  Hz, 0.2H), 6.83 (dd,  $J = 7.8, 1.3$  Hz, 0.8H), 6.93 (td,  $J = 7.5, 1.2$  Hz, 0.2H), 6.98 (td,  $J = 7.4, 1.3$  Hz, 0.8H), 7.04 – 7.17 (m, 2H), 7.72 (s, 0.8H), 9.59 (s, 0.2H);  $^{13}\text{C}$  NMR (101 MHz, DMSO, 30 °C) 141.9, 140.8, 136.0, 135.5, 130.9, 127.3, 126.8, 124.5, 124.5, 123.4, 123.2, 122.7, 112.9, 84.0, 82.3, 76.2, 75.6, 54.5, 51.8, 31.2, 3.3, 3.2; HRMS (ESI+) calcd for  $\text{C}_{13}\text{H}_{14}\text{N}_2$   $[\text{M}+\text{H}]^+$  199.12297 found 199.12346

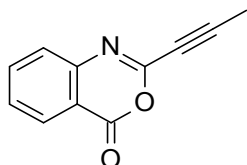

**2-prop-1-ynyl-3,1-benzoxazin-4-one (12):** Dicyclohexylmethanediimine (790 mg, 3.83 mmol) was added to a solution of but-2-ynoic acid (307 mg, 3.65 mmol) in DCM (18 mL) and the resultant stirred at rt for 10 minutes. 2-aminobenzoic acid (500 mg, 3.65 mmol) was subsequently added and the resultant suspension stirred for 2 hours. The reaction mixture was filtered and the solvent removed under vacuum to afford crude amide as a yellow solid which was used directly.

The crude was dissolved in DCM (50 mL), acetic anhydride (3.45 mL, 36.5 mmol) added and the resultant solution heated to 45 °C for 1 hour. The reaction mixture was quenched with saturated NaHCO<sub>3</sub> (100 mL), extracted with DCM (2 x 50 mL), the organic layer was dried over a phase separating cartridge, filtered and evaporated to afford yellow oil. The crude product was purified by flash silica chromatography, elution gradient 0 to 30% EtOAc in heptane. Pure fractions were evaporated to dryness to afford 2-(prop-1-yn-1-yl)-4H-benzo[d][1,3]oxazin-4-one (113 mg, 17%, over 2 steps) as a white solid. <sup>1</sup>H NMR (400 MHz, DMSO) 2.18 (s, 3H), 7.57 – 7.68 (m, 2H), 7.93 (ddd, *J* = 7.9, 7.4, 1.5 Hz, 1H), 8.11 (dd, *J* = 7.9, 1.1 Hz, 1H); <sup>13</sup>C NMR (101 MHz, DMSO, 30 °C) 158.4, 145.8, 142.5, 136.8, 129.2, 128.0, 126.6, 117.9, 90.7, 72.6, 3.6; HRMS (ESI+) calcd for C<sub>11</sub>H<sub>7</sub>NO<sub>2</sub> [M+H]<sup>+</sup> 186.0555, found 186.0545.

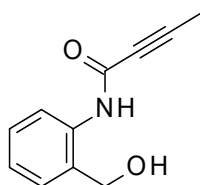

***N*-[2-(hydroxymethyl)phenyl]but-2-ynamide:** Dicyclohexylmethanediimine (880 mg, 4.26 mmol) was added to (2-aminophenyl)MeOH (500 mg, 4.06 mmol) and but-2-ynoic acid (341 mg, 4.06 mmol) in DCM (20 mL) at 0 °C under nitrogen. The resulting suspension was warmed to rt and stirred for 2 hours. The reaction mixture was filtered and the solvent evaporated to afford crude product. The crude product was purified by flash silica chromatography, elution gradient 20 to 60% EtOAc in heptane. Pure fractions were evaporated to dryness to afford *N*-(2-(hydroxymethyl)phenyl)but-2-ynamide (593 mg, 77%) as a white solid. <sup>1</sup>H NMR (400 MHz, DMSO) 2.04 (s, 3H), 4.49 (d, *J* = 5.5 Hz, 2H), 5.34 (t, *J* = 5.5 Hz, 1H), 7.18 (t, *J* = 7.4 Hz, 1H), 7.21 – 7.27 (m, 1H), 7.41 (d, *J* = 7.4 Hz, 1H), 7.47 (d, *J* = 7.4 Hz, 1H), 9.88 (s, 1H); <sup>13</sup>C NMR (101 MHz, DMSO, 30 °C) 150.8, 134.9, 134.4, 127.3, 127.0, 125.3, 124.1, 84.1, 75.6, 60.1, 3.1; LRMS *m/z* (ESI-) found 188.1

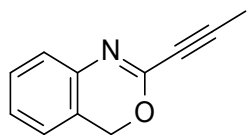

**2-prop-1-ynyl-4H-3,1-benzoxazine (13):** Methanesulfonyl chloride (0.09 mL, 1.11 mmol) was added dropwise to *N*-(2-(hydroxymethyl)phenyl)but-2-ynamide (200 mg, 1.06 mmol) and triethylamine (0.44 mL, 3.17 mmol) in DCM (11 mL) at 0 °C under nitrogen. The resulting solution was stirred at rt for 18 hours. The reaction mixture was washed sequentially with water (2 x 30 mL) and saturated brine (30 mL). The organic layer was dried with a phase separating cartridge, filtered and evaporated to afford crude benzyl chloride.

Sodium hydride (46.5 mg, 1.16 mmol) was added to a solution of crude benzyl chloride in DMF (25 mL) at 0 °C under nitrogen. The resulting solution was warmed to rt and stirred for 7 hours. The reaction mixture was quenched with saturated brine (10 mL) and extracted with EtOAc (25 mL). The organic layer was washed with water (2 x 50 mL) and

brine (50 mL) and dried over a phase separating cartridge, filtered and evaporated to afford orange oil. The crude product was purified by flash silica chromatography, elution gradient 0 to 50% EtOAc in heptane. Pure fractions were evaporated to dryness to afford 2-(prop-1-yn-1-yl)-4H-benzo[d][1,3]oxazine (5.2 mg, 3%, over 2 steps) as a white solid. <sup>1</sup>H NMR (500 MHz, CDCl<sub>3</sub>) 2.04 (s, 3H), 5.27 (s, 2H), 6.88 – 6.99 (m, 1H), 7.13 – 7.22 (m, 2H), 7.22 – 7.31 (m, 1H); <sup>13</sup>C NMR (126 MHz, CDCl<sub>3</sub>, 27 °C) 144.8, 138.9, 129.2, 127.4, 124.8, 123.9, 122.1, 86.7, 73.9, 66.8, 4.3; HRMS (ESI+) calcd for C<sub>11</sub>H<sub>9</sub>NO [M+H]<sup>+</sup> 172.0762, found 172.0759.

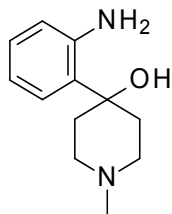

**4-(2-aminophenyl)-1-methylpiperidin-4-ol:** *n*-Butyllithium (1.6 M in hexanes) (1.1 mL, 1.76 mmol) was added dropwise to *tert*-butyl (2-bromophenyl)carbamate (191 mg, 0.70 mmol) in THF (2 mL) at -78 °C under nitrogen. The resulting solution was stirred at -78 °C for 30 minutes. 1-methylpiperidin-4-one (0.09 mL, 0.73 mmol) was added dropwise and the solution warmed to rt and stirred for 1 hour. The reaction mixture was quenched with saturated NH<sub>4</sub>Cl (10 mL) and extracted with EtOAc (2 x 20 mL). The aqueous phase was adjusted to pH 8 using saturated NaHCO<sub>3</sub> and washed with DCM (2 x 50 mL). The combined organic layers were dried over a phase separating cartridge, filtered and evaporated to afford crude 1'-methylspiro[benzo[d][1,3]oxazine-4,4'-piperidin]-2(1H)-one (210 mg) as a yellow oil which was used without further purification in the next step.

Sodium hydroxide (2M in H<sub>2</sub>O) (1.5 mL, 3.00 mmol) was added to crude 1'-methylspiro[benzo[d][1,3]oxazine-4,4'-piperidin]-2(1H)-one (210 mg) in EtOH (3 mL). The resulting solution was stirred at rt for 2 hours, warmed to 50 °C and stirred for 1 hour, then further heated to 80 °C and stirred for 16 hours. The solvent was removed under vacuum and the residue suspended in MeCN (10 mL) and filtered. The solution was purified by preparative HPLC (Waters XSelect CSH C18 ODB column, 5μ silica, 30 mm diameter, 100 mm length), using decreasingly polar mixtures of water (containing 1% NH<sub>3</sub>) and MeCN as eluents. Fractions containing the desired compound were evaporated to dryness to afford 4-(2-aminophenyl)-1-methylpiperidin-4-ol (40.1 mg, 27%, over 2 steps) as a pale yellow waxy solid. <sup>1</sup>H NMR (400 MHz, DMSO) 1.78 – 1.85 (m, 2H), 1.99 – 2.06 (m, 2H), 2.17 (s, 3H), 2.35 – 2.41 (m, 2H), 2.49 – 2.53 (m, 2H), 4.96 (s, 1H), 5.35 (s, 2H), 6.49 (ddd, *J* = 7.8, 7.3, 1.3 Hz, 1H), 6.60 (dd, *J* = 7.9, 1.3 Hz, 1H), 6.91 (ddd, *J* = 7.9, 7.3, 1.5 Hz, 1H), 7.01 (dd, *J* = 7.8, 1.5 Hz, 1H); <sup>13</sup>C NMR (126 MHz, DMSO, 27 °C) 147.4, 130.7, 127.2, 124.8, 116.2, 115.7, 69.9, 51.0, 46.1, 34.8; LRMS *m/z* (ESI+) [M+H]<sup>+</sup> 207.2

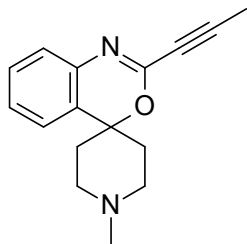

**1'-methyl-2-prop-1-ynyl-spiro[3,1-benzoxazine-4,4'-piperidine] (14):**

Dicyclohexylmethanediimine (39.8 mg, 0.19 mmol) was added to 4-(2-aminophenyl)-1-methylpiperidin-4-ol (39 mg, 0.19 mmol) and but-2-ynoic acid (16.2 mg, 0.19 mmol) in DCM (1 mL) under nitrogen. The resulting solution was stirred at rt for 2 hours. The reaction was incomplete and further but-2-ynoic acid (16.2 mg, 0.19 mmol) and dicyclohexylmethanediimine (39.8 mg, 0.19 mmol) were added and the solution was stirred at rt for a further 45 minutes. The reaction mixture was diluted with DCM (2 mL) and filtered through a syringe filter. The solvent was removed under vacuum to afford crude amide as a white foam.

To a solution of the crude intermediate in DCM (4 mL) was added methanesulfonic acid (0.06 mL, 0.92 mmol). The resultant solution was warmed to 45 °C and stirred for 30 minutes. The reaction mixture was quenched with saturated NaHCO<sub>3</sub> (15 mL) and extracted with DCM (2 x 10 mL). The organic layer was dried over a phase separating cartridge, filtered and evaporated to afford yellow oil. The crude product was purified by preparative HPLC (Waters XSelect CSH C18 ODB column, 5 μ silica, 30 mm diameter, 100 mm length), using decreasingly polar mixtures of water (containing 1% NH<sub>3</sub>) and MeCN as eluents. Fractions containing the desired compound were evaporated to dryness to afford 1'-methyl-2-(prop-1-yn-1-yl)spiro[benzo[d][1,3]oxazine-4,4'-piperidine] (21 mg, 44%, over 2 steps) as a colorless oil. <sup>1</sup>H NMR (400 MHz, CDCl<sub>3</sub>) 1.97 – 2.09 (m, 7H), 2.32 (s, 3H), 2.43 (td, *J* = 11.7, 3.4 Hz, 2H), 2.64 – 2.72 (m, 2H), 6.98 – 7.05 (m, 1H), 7.09 – 7.15 (m, 2H), 7.16 – 7.21 (m, 1H); <sup>13</sup>C NMR (101 MHz, CDCl<sub>3</sub>, 30 °C) 143.8, 138.5, 130.1, 128.8, 127.7, 125.1, 122.4, 86.0, 77.7, 74.6, 50.7, 46.3, 36.0, 4.4; HRMS (ESI+) calcd for C<sub>16</sub>H<sub>18</sub>N<sub>2</sub>O [M+H]<sup>+</sup> 255.1497 found 255.1491

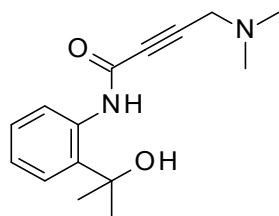

**4-(dimethylamino)-*N*-[2-(1-hydroxy-1-methyl-ethyl)phenyl]but-2-ynamide:** HATU (249 mg, 0.65 mmol) was added to 2-(2-aminophenyl)propan-2-ol (90 mg, 0.60 mmol) and 4-(dimethylamino)but-2-ynoic acid (76 mg, 0.60 mmol) in DMF (3 mL) under nitrogen. The resulting solution was stirred at rt for 15 minutes. The reaction mixture was diluted with DCM (20 mL) and washed sequentially with half saturated brine (20 mL). The organic layer was dried with a phase separating cartridge, filtered and evaporated to afford crude product. The crude product was purified by preparative HPLC (Waters XSelect CSH C18 ODB column, 5 $\mu$  silica, 30 mm diameter, 100 mm length), using decreasingly polar mixtures of water (containing 1% NH<sub>3</sub>) and MeCN as eluents. Fractions containing the desired compound were evaporated to dryness to afford 4-(dimethylamino)-*N*-(2-(2-hydroxypropan-2-yl)phenyl)but-2-ynamide (31.5 mg, 20 %) as a pale yellow oil. <sup>1</sup>H NMR (500 MHz, CD<sub>3</sub>CN) 1.61 (s, 6H), 2.27 (s, 6H), 3.41 (s, 2H), 7.04 – 7.12 (m, 1H), 7.23 – 7.28 (m, 1H), 7.29 – 7.35 (m, 1H), 8.15 (d, *J* = 8.1 Hz, 1H), 10.71 (s, 1H); <sup>13</sup>C NMR (126 MHz, CD<sub>3</sub>CN, 27°C) 150.9, 137.5, 136.7, 128.6, 126.7, 125.0, 123.2, 82.4, 81.7, 74.8, 48.0, 44.2, 30.5; LRMS *m/z* (ESI-) [*M*-H]<sup>-</sup> 259.1

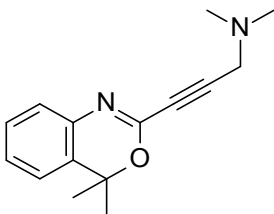

**3-(4,4-dimethyl-3,1-benzoxazin-2-yl)-*N,N*-dimethyl-prop-2-yn-1-amine (15):** Methanesulfonic acid (0.03 mL, 0.46 mmol) was added to 4-(dimethylamino)-*N*-(2-(2-hydroxypropan-2-yl)phenyl)but-2-ynamide (22 mg, 0.08 mmol) in DCM (1.9 mL) under nitrogen. The resulting solution was warmed to 45 °C and stirred for 30 minutes. The reaction mixture was quenched with saturated NaHCO<sub>3</sub> (15 mL) and extracted with DCM (2 x 15 mL). The organic layer was dried over a phase separating cartridge, filtered and evaporated to afford orange oil. The crude product was purified by preparative HPLC (Waters XSelect CSH C18 ODB column, 5 $\mu$  silica, 30 mm diameter, 100 mm length), using decreasingly polar mixtures of water (containing 1% NH<sub>3</sub>) and MeCN as eluents. Fractions containing the desired compound were evaporated to dryness to afford 3-(4,4-dimethyl-4H-benzo[d][1,3]oxazin-2-yl)-*N,N*-dimethylprop-2-yn-1-amine (13.9 mg, 68 %) as a pale yellow oil. <sup>1</sup>H NMR (500 MHz, CD<sub>3</sub>CN) 1.62 (s, 6H), 2.27 (s, 6H), 3.44 (s, 2H), 7.06 – 7.13 (m, 1H), 7.19 – 7.3 (m, 3H); <sup>13</sup>C NMR (126 MHz, CD<sub>3</sub>CN, 27°C) 144.4, 138.7, 132.4, 129.6, 128.8, 125.6, 123.8, 85.0, 80.5, 80.3, 48.4, 44.4, 28.7; LRMS *m/z* (ESI+) [*M*+H]<sup>+</sup> 243.2; HRMS (ESI+) calcd for C<sub>15</sub>H<sub>18</sub>N<sub>2</sub>O [*M*+H]<sup>+</sup> 243.1497 found 243.1504

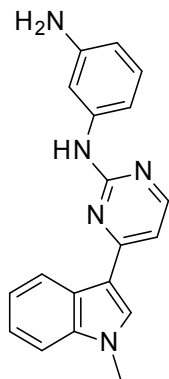

**N3-[4-(1-methylindol-3-yl)pyrimidin-2-yl]benzene-1,3-diamine (21):** 3-Nitroaniline (567 mg, 4.10 mmol), 3-(2-chloropyrimidin-4-yl)-1-methyl-1*H*-indole (1.01 g, 4.10 mmol) and 4-methylbenzenesulfonic acid (777 mg, 4.51 mmol) were suspended in EtOH (10 mL) and sealed into a microwave tube. The reaction was heated to 150 °C for 1 hour in the microwave reactor and cooled to rt. The reaction mixture was filtered and washed with MeOH (50 mL). The crude gum was triturated with MeOH to give a solid which was collected by filtration and dried under vacuum to afford crude 4-(1-methyl-1*H*-indol-3-yl)-*N*-(3-nitrophenyl)pyrimidin-2-amine (1.50 g) as a pale yellow solid which was used directly without further purification.

Iron (576 mg, 10.3 mmol) was added to crude 4-(1-methyl-1*H*-indol-3-yl)-*N*-(3-nitrophenyl)pyrimidin-2-amine (890 mg) and ammonia hydrochloride (64.4 mg, 1.20 mmol) in a mixture of EtOH (43.5 mL) and water (14.5 mL). The resulting suspension was warmed to 80 °C and stirred for 2.5 hours. The reaction mixture was filtered through celite and the solvent removed under vacuum. The crude residue was taken in DCM (50 mL), washed with saturated aq. NaHCO<sub>3</sub> (100 mL) and passed through a phase separator. The solvent was removed under vacuum to afford *N*1-(4-(1-methyl-1*H*-indol-3-yl)pyrimidin-2-yl)benzene-1,3-diamine (524 mg, 68%, over 2 steps) as a brown foam. <sup>1</sup>H NMR (500 MHz, DMSO) 3.88 (s, 3H), 4.93 (s, 2H), 6.22 (d, *J* = 7.0 Hz, 1H), 6.9 – 6.99 (m, 2H), 7.11 – 7.17 (m, 2H), 7.19 (t, *J* = 7.4 Hz, 1H), 7.26 (t, *J* = 7.4 Hz, 1H), 7.52 (d, *J* = 8.0 Hz, 1H), 8.26 – 8.32 (m, 2H), 8.64 (d, *J* = 8.0 Hz, 1H), 9.07 (s, 1H); <sup>13</sup>C NMR (126 MHz, DMSO, 27 °C) 162.0, 160.2, 156.7, 148.7, 141.4, 137.6, 132.7, 128.6, 125.6, 122.5, 122.1, 120.8, 112.6, 110.2, 107.8, 107.7, 106.8, 105.1, 33.0; LRMS *m/z* (ESI+) [*M*+*H*]<sup>+</sup> 316.2

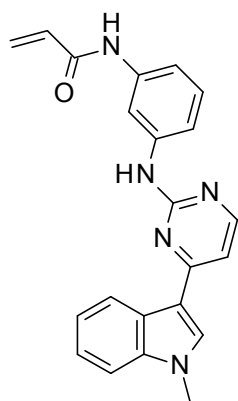



***N*-[3-[[4-(1-methylindol-3-yl)pyrimidin-2-yl]amino]phenyl]prop-2-enamide (16):** Acryloyl chloride (0.07 mL, 0.87 mmol) was added dropwise to *N*1-(4-(1-methyl-1*H*-indol-3-yl)pyrimidin-2-yl)benzene-1,3-diamine (260 mg, 0.82 mmol) and triethylamine (0.29 mL, 2.08 mmol) in DCM (5 mL) under nitrogen. The resulting solution was stirred at rt for 1 hour. The reaction mixture was quenched with saturated NaHCO<sub>3</sub> (15 mL) and extracted with DCM (3 x 10 mL). The organic layer was dried over a phase separating cartridge, filtered and evaporated to afford brown waxy solid. The crude product was purified by flash silica chromatography, elution gradient 40 to 90% EtOAc in heptane. Pure fractions were evaporated to dryness to afford *N*-(3-((4-(1-methyl-1*H*-indol-3-yl)pyrimidin-2-yl)amino)phenyl)acrylamide (57.0 mg, 19 %) as a pale yellow solid. <sup>1</sup>H NMR (400 MHz, DMSO) 3.90 (s, 3H), 5.75 (dd, *J* = 10.1, 2.0 Hz, 1H), 6.28 (dd, *J* = 17.0, 2.0 Hz, 1H), 6.50 (dd, *J* = 17.0, 10.1 Hz, 1H), 7.13 – 7.3 (m, 5H), 7.43 (dt, *J* = 6.6, 2.0 Hz, 1H), 7.53 (d, *J* = 8.2 Hz, 1H), 8.32 (s, 1H), 8.35 (d, *J* = 5.3 Hz, 1H), 8.44 (s, 1H), 8.54 (d, *J* = 7.7 Hz, 1H), 9.41 (s, 1H), 10.08 (s, 1H); <sup>13</sup>C NMR (101 MHz, DMSO, 30 °C) 163.0, 161.9, 160.0, 157.0, 141.2, 139.0, 137.6, 133.2, 132.1, 128.4, 126.5, 125.5, 122.1, 122.1, 120.8, 114.8, 112.8, 112.5, 110.6, 110.3, 107.2, 33.0; HRMS (ESI+) calcd for C<sub>22</sub>H<sub>19</sub>N<sub>5</sub>O [M+H]<sup>+</sup> 370.1668, found 370.1672

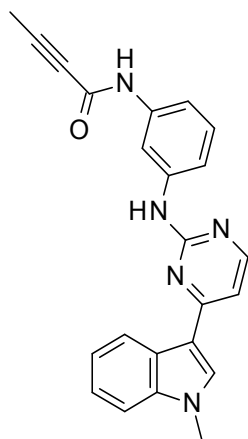

***N*-[3-[[4-(1-methylindol-3-yl)pyrimidin-2-yl]amino]phenyl]but-2-ynamide (17):**

Dicyclohexylmethanediiimine (187 mg, 0.91 mmol) was added to *N*1-(4-(1-methyl-1*H*-indol-3-yl)pyrimidin-2-yl)benzene-1,3-diamine (260 mg, 0.82 mmol) and 2-butyric acid (70.1 mg, 0.83 mmol) in DCM (5 mL) at 25 °C under nitrogen. The resulting solution was stirred at rt for 1 hour. The solvent was removed under vacuum to afford the crude as a brown wax. The crude product was purified by flash silica chromatography, elution gradient 40 to 90% EtOAc in heptane. Fractions containing product were evaporated to dryness to afford *N*-(3-((4-(1-methyl-1*H*-indol-3-yl)pyrimidin-2-yl)amino)phenyl)but-2-ynamide (177 mg, 54%) as a pale yellow solid. <sup>1</sup>H NMR (400 MHz, DMSO) 2.05 (s, 3H), 3.89 (s, 3H), 7.13 (d, *J* = 8.3 Hz, 1H), 7.17 – 7.3 (m, 4H), 7.46 – 7.56 (m, 2H), 8.18 (t, *J* = 2.1 Hz, 1H), 8.3 – 8.4 (m, 2H), 8.56 (d, *J* = 7.9 Hz, 1H), 9.41 (s, 1H), 10.52 (s, 1H); <sup>13</sup>C NMR (101 MHz, DMSO, 30 °C) 161.9, 160.0, 156.9,

150.4, 141.2, 138.5, 137.6, 133.0, 128.4, 125.5, 122.3, 122.1, 120.8, 115.2, 113.0, 112.5, 111.1, 110.3, 107.2, 83.8, 76.0, 32.9, 3.2; HRMS (ESI+) calcd for C<sub>23</sub>H<sub>19</sub>N<sub>5</sub>O [M+H]<sup>+</sup> 382.1668, found 382.1684

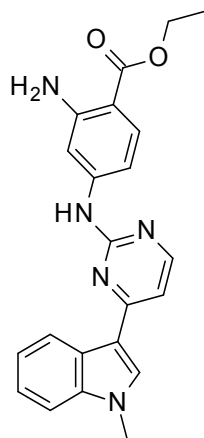

**ethyl 2-amino-4-[[4-(1-methylindol-3-yl)pyrimidin-2-yl]amino]benzoate (22):** Ethyl 4-amino-2-nitrobenzoate (200 mg, 0.95 mmol), 3-(2-chloropyrimidin-4-yl)-1-methyl-1*H*-indole (232 mg, 0.95 mmol) and 4-methylbenzenesulfonic acid (180 mg, 1.05 mmol) were suspended in EtOH (1.9 mL) and sealed into a microwave tube. The reaction was heated to 150 °C for 1 hour in the microwave reactor and cooled to rt. The solvent was removed under vacuum and the crude residue purified by flash silica chromatography, elution gradient 0 to 5% MeOH in DCM. Fractions containing products were evaporated to dryness to afford a 2:1 mixture of ethyl 4-((4-(1-methyl-1*H*-indol-3-yl)pyrimidin-2-yl)amino)-2-nitrobenzoate and *p*TSA (317 mg) as a brown solid which was used directly in the next reaction without further purification.

Iron (257 mg, 4.61 mmol) was added to methyl 4-((4-(1-methyl-1*H*-indol-3-yl)pyrimidin-2-yl)amino)-2-nitrobenzoate (310 mg) and ammonia hydrochloride (28.8 mg, 0.54 mmol) in a mixture of EtOH (16 mL) and water (5 mL). The resulting suspension was stirred at 80 °C for 2 hours. The reaction mixture was filtered through celite and the solvent removed under vacuum to afford a brown residue. The residue was dissolved in DCM (20 mL) and passed through a phase separator. The solvent was removed under vacuum to afford ethyl 2-amino-4-((4-(1-methyl-1*H*-indol-3-yl)pyrimidin-2-yl)amino)benzoate (228 mg, 62%, over 2 steps) as a yellow foam. <sup>1</sup>H NMR (500 MHz, DMSO) 1.30 (t, *J* = 7.1 Hz, 3H), 3.89 (s, 3H), 4.23 (q, *J* = 7.1 Hz, 2H), 6.65 (s, 2H), 6.96 (dd, *J* = 8.9, 2.0 Hz, 1H), 7.2 – 7.25 (m, 1H), 7.25 – 7.31 (m, 2H), 7.47 (d, *J* = 2.0 Hz, 1H), 7.54 (d, *J* = 8.1 Hz, 1H), 7.66 (d, *J* = 8.9 Hz, 1H), 8.33 (s, 1H), 8.38 (d, *J* = 5.4 Hz, 1H), 8.64 (d, *J* = 7.9 Hz, 1H), 9.54 (s, 1H). (s, 1H); <sup>13</sup>C NMR (126 MHz, DMSO, 27 °C) 167.2, 162.2, 159.7, 156.6, 152.4, 145.9, 137.7, 133.1, 131.1, 125.5, 122.3, 122.3, 120.9, 112.3, 110.4, 108.0, 107.3, 103.8, 102.7, 59.3, 33.0, 14.4; LRMS *m/z* (ESI-) [M-H]<sup>-</sup> 377.2.

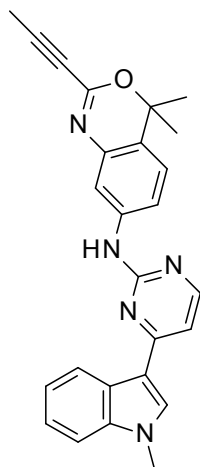

**4,4-dimethyl-N-[4-(1-methylindol-3-yl)pyrimidin-2-yl]-2-prop-1-ynyl-3,1-benzoxazin-7-amine (18):**

Methylmagnesium bromide (3M in Et<sub>2</sub>O) (2.58 mL, 7.74 mmol) was added dropwise to ethyl 2-amino-4-((4-(1-methyl-1*H*-indol-3-yl)pyrimidin-2-yl)amino)benzoate (600 mg, 1.55 mmol) in THF (5 mL) at 0 °C under nitrogen. The resulting solution was warmed to rt and stirred for 2.5 hours. The reaction mixture was quenched with water (40 mL) and extracted with DCM (3 x 50 mL). The organic layer was dried over a phase separating cartridge, filtered and evaporated to afford 2-(2-amino-4-((4-(1-methyl-1*H*-indol-3-yl)pyrimidin-2-yl)amino)phenyl)propan-2-ol (314 mg) as a yellow solid which was used in the next reaction without further purification.

Dicyclohexylmethanediimine (176 mg, 0.85 mmol) was added to 2-(2-amino-4-((4-(1-methyl-1*H*-indol-3-yl)pyrimidin-2-yl)amino)phenyl)propan-2-ol (370 mg) and 2-butyric acid (65.9 mg, 0.78 mmol) in DCM (10 mL) at 25 °C under nitrogen. The resulting solution was stirred at rt for 18 hours. The reaction mixture was diluted with Et<sub>2</sub>O (50 mL), filtered and the solvent removed under vacuum to afford crude *N*-(2-(2-hydroxypropan-2-yl)-5-((4-(1-methyl-1*H*-indol-3-yl)pyrimidin-2-yl)amino)phenyl)but-2-ynamide (285 mg) as a yellow solid.

Methanesulfonic acid (0.16 mL, 2.46 mmol) was added to *N*-(2-(2-hydroxypropan-2-yl)-5-((4-(1-methyl-1*H*-indol-3-yl)pyrimidin-2-yl)amino)phenyl)but-2-ynamide (279 mg) in DCM (10.7 mL) at 25 °C under nitrogen. The resulting solution was warmed to 45 °C and stirred for 1.5 hours. The reaction mixture was quenched with saturated NaHCO<sub>3</sub> (25 mL) and the organic layer was dried over a phase separating cartridge, filtered and evaporated to afford yellow foam. The crude product was purified by preparative HPLC (Waters XSelect CSH C18 ODB column, 5 μ silica, 30 mm diameter, 100 mm length), using decreasingly polar mixtures of water (containing 1% NH<sub>3</sub>) and MeCN as eluents. Fractions containing the desired compound were evaporated to dryness to afford 4,4-dimethyl-*N*-(4-(1-methyl-1*H*-indol-3-yl)pyrimidin-2-yl)-2-(prop-1-yn-1-yl)-4*H*-benzo[d][1,3]oxazin-7-amine (143 mg, 38%, over 3 steps) as a cream solid. <sup>1</sup>H NMR (400 MHz, DMSO) 1.59 (s, 6H), 2.07 (s, 3H), 3.90 (s, 3H), 7.16 – 7.25 (m, 3H), 7.28 (ddd, *J* = 8.2, 7.1, 1.2 Hz, 1H), 7.54 (d, *J* = 8.2 Hz, 1H), 7.62 (d, *J* = 2.2 Hz, 1H), 7.68 (dd, *J* = 8.2, 2.2 Hz, 1H), 8.31 (s, 1H), 8.34 (d, *J* = 5.4 Hz, 1H), 8.64 (d, *J* = 7.8 Hz, 1H), 9.44 (s, 1H); <sup>13</sup>C NMR (101 MHz, DMSO, 30 °C) 162.2, 160.0, 156.7, 143.1, 141.0, 137.6,

137.5, 132.8, 125.5, 123.9, 122.8, 122.5, 122.2, 120.8, 118.0, 114.7, 112.4, 110.2, 107.4, 86.0, 79.1, 74.6, 33.0, 28.3, 3.3; HRMS (ESI+) calcd for C<sub>26</sub>H<sub>23</sub>N<sub>5</sub>O [M+H]<sup>+</sup> 422.1981, found 422.1970

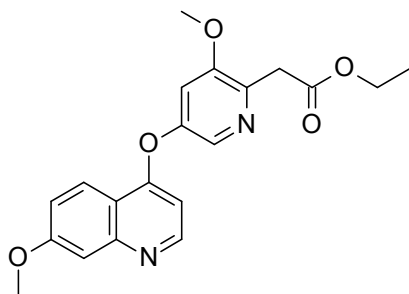

**ethyl 2-[3-methoxy-5-[(7-methoxy-4-quinolyl)oxy]-2-pyridyl]acetate:**

4-Dimethylaminopyridine (3.01 g, 24.6 mmol) was added to 4-chloro-7-methoxyquinoline (1.59 g, 8.21 mmol) and ethyl 2-(5-hydroxy-3-methoxypyridin-2-yl)acetate<sup>a</sup> (1.73 g, 8.21 mmol) in chlorobenzene (17 ml) under nitrogen. The resulting suspension was warmed to 135 °C and stirred for 18 hours. The solvent was removed under vacuum to afford brown solid. The crude product was absorbed on to silica and purified by flash silica chromatography, elution gradient 0 to 5% 1M NH<sub>3</sub>/MeOH in DCM. Fractions containing product were evaporated to dryness to afford ethyl 2-(3-methoxy-5-[(7-methoxyquinolin-4-yl)oxy]pyridin-2-yl)acetate (2.62 g, 87 %) as a pink solid. <sup>1</sup>H NMR (400 MHz, DMSO) 1.19 (t, *J* = 7.1 Hz, 3H), 3.81 (s, 2H), 3.82 (s, 3H), 3.95 (s, 3H), 4.11 (q, *J* = 7.1 Hz, 2H), 6.57 (d, *J* = 5.2 Hz, 1H), 7.31 (dd, *J* = 9.1, 2.5 Hz, 1H), 7.43 (d, *J* = 2.5 Hz, 1H), 7.52 (d, *J* = 2.3 Hz, 1H), 8.08 (d, *J* = 2.3 Hz, 1H), 8.22 (d, *J* = 9.1 Hz, 1H), 8.65 (d, *J* = 5.2 Hz, 1H); <sup>13</sup>C NMR (101 MHz, DMSO, 30°C) 169.8, 160.8, 160.5, 154.5, 151.8, 151.3, 150.7, 141.9, 132.5, 122.7, 118.9, 115.1, 111.9, 107.4, 103.0, 60.2, 56.2, 55.5, 38.4, 14.0, 13.9; LRMS *m/z* (ESI+) [M+H]<sup>+</sup> 369.2

<sup>a</sup> ethyl 2-(5-hydroxy-3-methoxypyridin-2-yl)acetate was obtained from an in-house building block collection and previously made according to literature procedure<sup>17</sup>

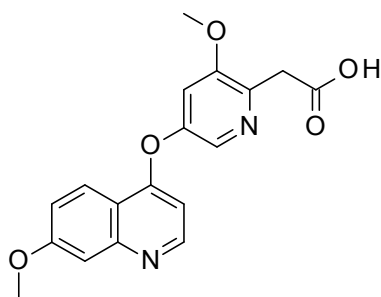

**2-[3-methoxy-5-[(7-methoxy-4-quinolyl)oxy]-2-pyridyl]acetic acid:** Lithium hydroxide monohydrate (446 mg, 10.6 mmol) was added to ethyl 2-(3-methoxy-5-[(7-methoxyquinolin-4-yl)oxy]pyridin-2-yl)acetate (2.61 g, 7.08 mmol) in a mixture of THF (16.5 ml) and water (11 ml). The resulting solution was stirred at rt for 2 hours. THF was removed under vacuum and the resulting solution acidified to pH 3 by dropwise addition of 2M HCl until pH 8, followed by

addition of 1M citric acid. The precipitate was collected by filtration, washed with water (3 x 20 mL) and dried under vacuum to afford 2-(3-methoxy-5-((7-methoxyquinolin-4-yl)oxy)pyridin-2-yl)acetic acid (2.32 g, 96%) as a cream solid. <sup>1</sup>H NMR (400 MHz, DMSO) 3.29 (s, 2H), 3.82 (s, 3H), 3.95 (s, 3H), 6.57 (d, *J* = 5.2 Hz, 1H), 7.31 (dd, *J* = 9.1, 2.5 Hz, 1H), 7.43 (d, *J* = 2.5 Hz, 1H), 7.51 (d, *J* = 2.3 Hz, 1H), 8.07 (d, *J* = 2.3 Hz, 1H), 8.22 (d, *J* = 9.1 Hz, 1H), 8.65 (d, *J* = 5.2 Hz, 1H), 12.34 (s, 1H); <sup>13</sup>C NMR (101 MHz, DMSO, 30°C) 171.3, 160.8, 160.5, 154.5, 151.8, 151.3, 150.5, 142.4, 132.4, 122.7, 118.9, 115.1, 111.8, 107.4, 103.0, 56.1, 55.5, 38.5; LRMS *m/z* (ESI+) [M+H]<sup>+</sup> 341.1

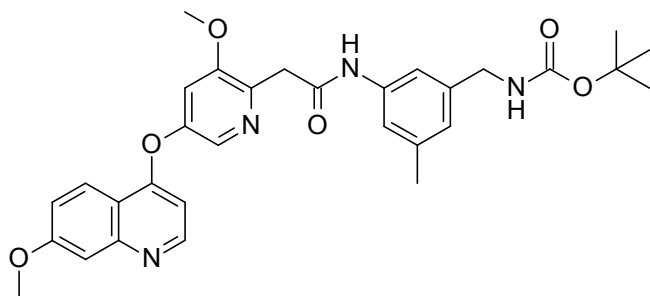

***tert*-butyl N-[[[3-[[2-[3-methoxy-5-[(7-methoxy-4-quinolyl)oxy]-2-pyridyl]acetyl]amino]-5-methylphenyl]methyl]carbamate:** O-(7-Azabenzotriazol-1-yl)-*N,N,N'*-tetramethyluronium hexafluorophosphate (275 mg, 0.72 mmol) was added to *tert*-butyl 3-amino-5-methylbenzylcarbamate (114 mg, 0.48 mmol), 2-(3-methoxy-5-((7-methoxyquinolin-4-yl)oxy)pyridin-2-yl)acetic acid (164 mg, 0.48 mmol) and DIPEA (0.21 mL, 1.21 mmol) in DMF (2 mL) at rt under nitrogen. The resulting mixture was stirred at rt for 16 hours. Water (20 mL) and EtOAc (50 mL) were added and the layers were separated. The aqueous layer was extracted with EtOAc (2 x 50 mL) and the combined organic layers were washed with saturated brine (20 mL). The organic layer was dried over MgSO<sub>4</sub> and concentrated under reduced pressure to give the crude product. The crude product was purified by flash silica chromatography, elution gradient 0 to 100%, 3:1 EtOAc:EtOH in heptane. Pure fractions were evaporated to dryness to afford *tert*-butyl 3-(2-(3-methoxy-5-((7-methoxyquinolin-4-yl)oxy)pyridin-2-yl)acetamido)-5-methylbenzylcarbamate (224 mg, 83%) as a white solid. <sup>1</sup>H NMR (500 MHz, DMSO) 1.40 (s, 9H), 2.25 (s, 3H), 3.83 (s, 3H), 3.86 (s, 2H), 3.95 (s, 3H), 4.05 (d, *J* = 6.0 Hz, 2H), 6.56 (d, *J* = 5.2 Hz, 1H), 6.74 (s, 1H), 7.26 (s, 1H), 7.29 – 7.39 (m, 3H), 7.44 (d, *J* = 2.5 Hz, 1H), 7.52 (d, *J* = 2.2 Hz, 1H), 8.09 (d, *J* = 2.2 Hz, 1H), 8.23 (d, *J* = 9.1 Hz, 1H), 8.66 (d, *J* = 5.2 Hz, 1H), 10.06 (s, 1H); <sup>13</sup>C NMR (126 MHz, DMSO, 27°C) 167.7, 160.8, 160.7, 155.7, 154.6, 151.9, 151.3, 150.3, 143.4, 140.6, 139.2, 137.6, 132.5, 122.7, 122.4, 118.9, 118.0, 115.1, 114.9, 111.8, 107.4, 102.9, 77.7, 56.2, 55.5, 43.4, 40.6, 28.3, 21.2; LRMS *m/z* (ESI+) [M+H]<sup>+</sup> 559.3

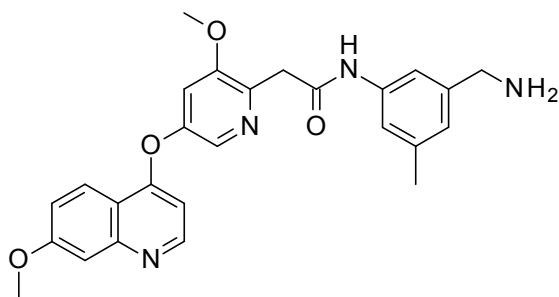

***N*-[3-(aminomethyl)-5-methyl-phenyl]-2-[3-methoxy-5-[(7-methoxy-4-quinolyl)oxy]-2-pyridyl]acetamide:** 2,2,2-trifluoroacetic acid (1 mL, 13.1 mmol) was added to *tert*-butyl (3-(2-(3-methoxy-5-[(7-methoxyquinolin-4-yl)oxy]pyridin-2-yl)acetamido)-5-methylbenzyl)carbamate (260 mg, 0.47 mmol) in DCM (4 mL) under nitrogen. The resulting solution was stirred at rt for 90 minutes. The solvent was removed under vacuum and the resultant residue was diluted with EtOAc (50 mL), and washed sequentially with saturated Na<sub>2</sub>CO<sub>3</sub> (100 mL) and saturated brine (50 mL). The organic layer was dried with a phase separating cartridge. The resulting solution was evaporated to dryness and the residue was azeotroped with heptane to afford desired *N*-(3-(aminomethyl)-5-methylphenyl)-2-(3-methoxy-5-[(7-methoxyquinolin-4-yl)oxy]pyridin-2-yl)acetamide (178 mg, 83 %) as a cream solid. <sup>1</sup>H NMR (400 MHz, DMSO) 2.25 (s, 3H), 3.64 (s, 2H), 3.82 (s, 3H), 3.85 (s, 2H), 3.95 (s, 3H), 6.56 (d, *J* = 5.2 Hz, 1H), 6.84 (s, 1H), 7.28 – 7.36 (m, 3H), 7.43 (d, *J* = 2.5 Hz, 1H), 7.50 (d, *J* = 2.2 Hz, 1H), 8.09 (d, *J* = 2.3 Hz, 1H), 8.23 (d, *J* = 9.2 Hz, 1H), 8.65 (d, *J* = 5.2 Hz, 1H), 9.99 (s, 1H); <sup>13</sup>C NMR (126 MHz, DMSO, 27°C) 167.6, 160.8, 160.7, 154.6, 151.9, 151.3, 150.3, 144.7, 143.4, 139.1, 137.4, 132.5, 122.7, 122.5, 118.9, 117.5, 115.1, 115.0, 111.8, 107.4, 102.9, 56.2, 55.5, 45.7, 40.5, 21.2; LRMS *m/z* (ESI+) [M+H]<sup>+</sup> 459.3

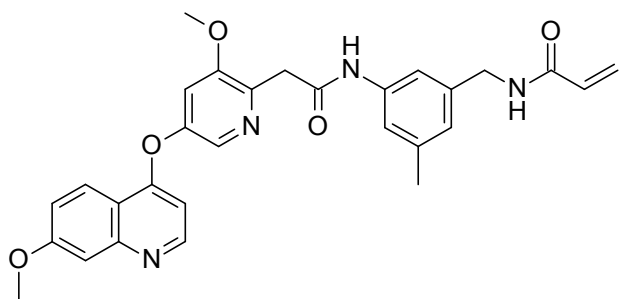

***N*-[[3-[[2-[3-methoxy-5-[(7-methoxy-4-quinolyl)oxy]-2-pyridyl]acetyl]amino]-5-methyl-phenyl]methyl]prop-2-enamide (25):** A solution of acryloyl chloride (13 mg, 0.14 mmol) in DCM (0.5 mL) was added dropwise to a stirred suspension of *N*-(3-(aminomethyl)-5-methylphenyl)-2-(3-methoxy-5-[(7-methoxyquinolin-4-yl)oxy]pyridin-2-yl)acetamide (66 mg, 0.14 mmol) and *N*-ethyl-*N*-isopropylpropan-2-amine (0.03 mL, 0.14 mmol) in DCM (5 mL) at 0 °C. The resulting solution was stirred at 0 °C for 60 minutes. The solvent was removed under vacuum and the residue purified by flash silica chromatography, elution gradient 0 to 60% 3:1 EtOAc:EtOH in heptane. Pure fractions were

evaporated to dryness to afford *N*-(3-(2-(3-methoxy-5-((7-methoxyquinolin-4-yl)oxy)pyridin-2-yl)acetamido)-5-methylbenzyl)acrylamide (55.0 mg, 75%) as a white foam. <sup>1</sup>H NMR (500 MHz, DMSO) 2.25 (s, 3H), 3.82 (s, 3H), 3.85 (s, 2H), 3.94 (s, 3H), 4.27 (d, *J* = 6.0 Hz, 2H), 5.62 (dd, *J* = 10.2, 2.2 Hz, 1H), 6.13 (dd, *J* = 17.1, 2.2 Hz, 1H), 6.28 (dd, *J* = 17.1, 10.2 Hz, 1H), 6.55 (d, *J* = 5.2 Hz, 1H), 6.77 (s, 1H), 7.29 (s, 1H), 7.31 (dd, *J* = 9.1, 2.5 Hz, 1H), 7.38 (s, 1H), 7.43 (d, *J* = 2.5 Hz, 1H), 7.50 (d, *J* = 2.2 Hz, 1H), 8.09 (d, *J* = 2.2 Hz, 1H), 8.22 (d, *J* = 9.1 Hz, 1H), 8.56 (t, *J* = 5.9 Hz, 1H), 8.65 (d, *J* = 5.2 Hz, 1H), 10.08 (s, 1H). ; <sup>13</sup>C NMR (126 MHz, DMSO, 27°C) 167.8, 164.5, 160.8, 160.7, 154.6, 151.9, 151.3, 150.3, 143.3, 139.7, 139.3, 137.8, 132.5, 131.7, 125.4, 122.9, 122.7, 118.9, 118.1, 115.2, 115.1, 111.8, 107.4, 102.9, 56.2, 55.5, 42.2, 40.5, 21.2; HRMS (ESI+) calcd for C<sub>29</sub>H<sub>28</sub>N<sub>4</sub>O<sub>5</sub> [M+H]<sup>+</sup> 513.2138, found 513.2121

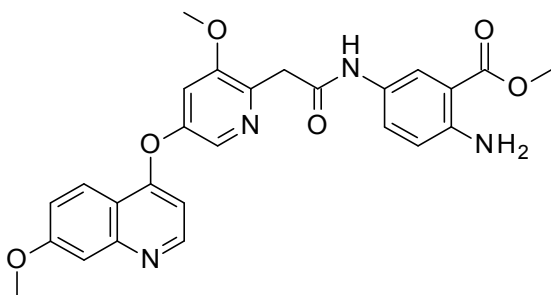

**methyl 2-amino-5-[[2-[3-methoxy-5-[(7-methoxy-4-quinolyl)oxy]-2-pyridyl]acetyl]amino]benzoate:** HATU (614 mg, 1.62 mmol) was added to methyl 2,5-diaminobenzoate (293 mg, 1.76 mmol), 2-(3-methoxy-5-((7-methoxyquinolin-4-yl)oxy)pyridin-2-yl)acetic acid (500 mg, 1.47 mmol) and *N*-ethyl-*N*-isopropylpropan-2-amine (0.77 ml, 4.41 mmol) in DMF (10 ml) under nitrogen. The resulting solution was stirred at rt for 3 hours. The reaction mixture was diluted with DCM (200 mL) and washed with saturated brine (2 x 200 mL). The organic layer was dried with a phase separating cartridge, filtered and evaporated to afford crude product. The crude product was purified by preparative HPLC (Waters XSelect CSH C18 ODB column, 5μ silica, 30 mm diameter, 100 mm length), using decreasingly polar mixtures of water (containing 1% NH<sub>3</sub>) and MeCN as eluents. Fractions containing the desired compound were evaporated to dryness to afford methyl 2-amino-5-(2-(3-methoxy-5-((7-methoxyquinolin-4-yl)oxy)pyridin-2-yl)acetamido)benzoate (523 mg, 73 %) as a beige solid. <sup>1</sup>H NMR (400 MHz, DMSO) 3.79 (s, 3H), 3.81 (s, 2H), 3.83 (s, 3H), 3.95 (s, 3H), 6.46 (s, 2H), 6.57 (d, *J* = 5.2 Hz, 1H), 6.74 (d, *J* = 8.9 Hz, 1H), 7.32 (dd, *J* = 9.1, 2.5 Hz, 1H), 7.41 – 7.47 (m, 2H), 7.50 (d, *J* = 2.3 Hz, 1H), 8.03 (d, *J* = 2.5 Hz, 1H), 8.09 (d, *J* = 2.3 Hz, 1H), 8.23 (d, *J* = 9.1 Hz, 1H), 8.66 (d, *J* = 5.2 Hz, 1H), 9.85 (s, 1H); <sup>13</sup>C NMR (101 MHz, DMSO, 30°C) 167.6, 167.1, 160.8, 160.6, 154.6, 151.8, 151.3, 150.3, 147.7, 143.4, 132.4, 127.5, 127.0, 122.7, 121.0, 118.9, 116.6, 115.1, 111.7, 108.1, 107.4, 102.9, 56.2, 55.5, 51.3; LRMS *m/z* (ESI+) [M+H]<sup>+</sup> 489.3

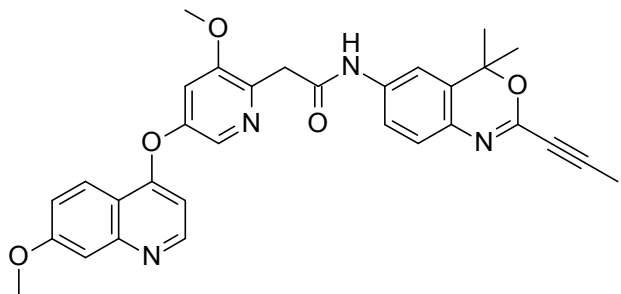

***N*-(4,4-dimethyl-2-prop-1-ynyl-3,1-benzoxazin-6-yl)-2-[3-methoxy-5-[(7-methoxy-4-quinolyl)oxy]-2-pyridyl]acetamide (26):**

Methyl 2-amino-5-(2-(3-methoxy-5-((7-methoxyquinolin-4-yl)oxy)pyridin-2-yl)acetamido)benzoate (435 mg, 0.89 mmol) was dissolved in THF (8 ml) and methylmagnesium bromide (3M in Et<sub>2</sub>O) (1.187 ml, 3.56 mmol) added dropwise. The resultant solution was stirred at rt for 2 hours. The reaction mixture was quenched with water (10 mL) and extracted with EtOAc (2 x 50 mL). The organic layer was dried over a phase separating cartridge, filtered and evaporated to afford crude *N*-(4-amino-3-(2-hydroxypropan-2-yl)phenyl)-2-(3-methoxy-5-((7-methoxyquinolin-4-yl)oxy)pyridin-2-yl) acetamide (438 mg) as a brown waxy solid.

Dicyclohexylmethanediimine (193 mg, 0.93 mmol) was added to *N*-(4-amino-3-(2-hydroxypropan-2-yl)phenyl)-2-(3-methoxy-5-((7-methoxyquinolin-4-yl)oxy)pyridin-2-yl) acetamide (435 mg) and but-2-ynoic acid (79 mg, 0.93 mmol) in DCM (4.0 ml) under nitrogen. The resulting solution was stirred at rt for 1 hour. The reaction mixture was diluted with DCM (10 mL) and washed with saturated NaHCO<sub>3</sub> (10 mL). The organic layer was dried with a phase separating cartridge, filtered and evaporated to afford crude *N*-[4-[[2-[3-methoxy-5-[(7-methoxy-4-quinolyl)oxy]-2-pyridyl]acetyl]amino]-2-(1-methoxy-1-methyl-ethyl)phenyl]but-2-ynamide (512 mg) which was used directly without further purification. Methanesulfonic acid (0.289 ml, 4.45 mmol) was added to crude *N*-[4-[[2-[3-methoxy-5-[(7-methoxy-4-quinolyl)oxy]-2-pyridyl]acetyl]amino]-2-(1-methoxy-1-methyl-ethyl)phenyl]but-2-ynamide (510 mg) in DCM (20 ml) under nitrogen. The resulting solution was warmed to 45 °C and stirred for 1 hour. The reaction mixture was quenched with saturated NaHCO<sub>3</sub> (25 mL) and extracted with DCM (2 x 50 mL). The organic layer was dried over a phase separating cartridge, filtered and evaporated to afford orange oil. The crude product was purified by preparative HPLC (Waters XSelect CSH C18 ODB column, 5μ silica, 30 mm diameter, 100 mm length), using decreasingly polar mixtures of water (containing 1% NH<sub>3</sub>) and MeCN as eluents. Fractions containing the desired compound were evaporated to dryness to afford *N*-(4,4-dimethyl-2-(prop-1-yn-1-yl)-4H-benzo[d][1,3]oxazin-6-yl)-2-(3-methoxy-5-((7-methoxyquinolin-4-yl)oxy)pyridin-2-yl)acetamide (255 mg, 53 %, over 3 steps) as a pale yellow solid. <sup>1</sup>H NMR (400 MHz, DMSO) 1.55 (s, 6H), 2.05 (s, 3H), 3.83 (s, 3H), 3.88 (s, 2H), 3.95 (s, 3H), 6.57 (d, *J* = 5.2 Hz, 1H), 7.03 (d, *J* = 8.5 Hz, 1H), 7.32 (dd, *J* = 9.1, 2.6 Hz, 1H), 7.41 – 7.49 (m, 2H), 7.52 (d, *J* = 2.3 Hz, 1H), 7.61 (d, *J* = 2.2 Hz, 1H), 8.10 (d, *J* = 2.3 Hz, 1H), 8.23 (d, *J* = 9.1 Hz, 1H), 8.66 (d, *J* = 5.2 Hz, 1H), 10.26 (s, 1H); <sup>13</sup>C NMR (126 MHz, DMSO, 27°C) 167.9, 160.8, 160.6, 154.6, 151.9, 151.3, 150.4, 143.1, 141.9, 138.7, 132.8, 132.5, 131.5, 124.7, 122.7,



118.9, 118.8, 115.1, 113.1, 111.8, 107.4, 102.9, 86.2, 78.8, 74.5, 56.2, 55.5, 40.5, 27.9, 3.4; HRMS (ESI+) calcd for C<sub>31</sub>H<sub>28</sub>N<sub>4</sub>O<sub>5</sub> [M+H]<sup>+</sup> 537.2138, found 537.2120

## References

1. Lebraud, H.; Coxon, C. R.; Archard, V. S.; Bawn, C. M.; Carbain, B.; Matheson, C. J.; Turner, D. M.; Cano, C.; Griffin, R. J.; Hardcastle, I. R.; Baisch, U.; Harrington, R. W.; Golding, B. T., Model system for irreversible inhibition of Nek2: thiol addition to ethynylpurines and related substituted heterocycles. *Organic & Biomolecular Chemistry* **2014**, *12* (1), 141-148.
2. Kettle, J. G.; Anjum, R.; Barry, E.; Bhavsar, D.; Brown, C.; Boyd, S.; Campbell, A.; Goldberg, K.; Grondine, M.; Guichard, S.; Hardy, C. J.; Hunt, T.; Jones, R. D. O.; Li, X.; Moleva, O.; Ogg, D.; Overman, R. C.; Packer, M. J.; Pearson, S.; Schimpl, M.; Shao, W.; Smith, A.; Smith, J. M.; Stead, D.; Stokes, S.; Tucker, M.; Ye, Y., Discovery of N-(4-([5-Fluoro-7-(2-methoxyethoxy)quinazolin-4-yl]amino)phenyl)-2-[4-(propan-2-yl)-1H-1,2,3-triazol-1-yl]acetamide (AZD3229), a Potent Pan-KIT Mutant Inhibitor for the Treatment of Gastrointestinal Stromal Tumors. *J Med Chem* **2018**, *61* (19), 8797-8810.
3. Kabsch, W., XDS. *Acta Crystallographica Section D* **2010**, *66* (2), 125-132.
4. Evans, P. R.; Murshudov, G. N., How good are my data and what is the resolution? *Acta Crystallographica Section D* **2013**, *69* (7), 1204-1214.
5. Winn, M. D.; Ballard, C. C.; Cowtan, K. D.; Dodson, E. J.; Emsley, P.; Evans, P. R.; Keegan, R. M.; Krissinel, E. B.; Leslie, A. G.; McCoy, A.; McNicholas, S. J.; Murshudov, G. N.; Pannu, N. S.; Potterton, E. A.; Powell, H. R.; Read, R. J.; Vagin, A.; Wilson, K. S., Overview of the CCP4 suite and current developments. *Acta Crystallogr D Biol Crystallogr* **2011**, *67* (Pt 4), 235-42.
6. Bricogne, G.; Blanc, E.; Brandl, M.; Flensburg, C.; Keller, P.; Paciorek, W.; Roversi, P.; Sharff, A.; Smart, O., Vonrhein, C. & Womack, T. BUSTER v.2.11.6. <http://www.globalphasing.com>.
7. Emsley, P.; Lohkamp, B.; Scott, W. G.; Cowtan, K., Features and development of Coot. *Acta Crystallographica Section D* **2010**, *66* (4), 486-501.
8. O. S. Smart, T. O. W., A. Sharff, C. Flensburg, P. Keller, W. Paciorek, C. Vonrhein, and G. Bricogne, grade, version 1.2.9. Cambridge, United Kingdom, Global Phasing Ltd: 2011.
9. Cee, V. J.; Volak, L. P.; Chen, Y.; Bartberger, M. D.; Tegley, C.; Arvedson, T.; McCarter, J.; Tasker, A. S.; Fotsch, C., Systematic Study of the Glutathione (GSH) Reactivity of N-Arylacrylamides: 1. Effects of Aryl Substitution. *Journal of Medicinal Chemistry* **2015**, *58* (23), 9171-9178.
10. Thorarensen, A.; Dowty, M. E.; Banker, M. E.; Juba, B.; Jussif, J.; Lin, T.; Vincent, F.; Czerwinski, R. M.; Casimiro-Garcia, A.; Unwalla, R.; Trujillo, J. I.; Liang, S.; Balbo, P.; Che, Y.; Gilbert, A. M.; Brown, M. F.; Hayward, M.; Montgomery, J.; Leung, L.; Yang, X.; Soucy, S.; Hegen, M.; Coe, J.; Langille, J.; Vajdos, F.; Chrencik, J.; Telliez, J.-B., Design of a Janus Kinase 3 (JAK3) Specific Inhibitor 1-((2S,5R)-5-((7H-Pyrrolo[2,3-d]pyrimidin-4-yl)amino)-2-

methylpiperidin-1-yl)prop-2-en-1-one (PF-06651600) Allowing for the Interrogation of JAK3 Signaling in Humans. *Journal of Medicinal Chemistry* **2017**, 60 (5), 1971-1993.

11. Alam, I. S.; Neves, A. A.; Witney, T. H.; Boren, J.; Brindle, K. M., Comparison of the C2A Domain of Synaptotagmin-I and Annexin-V As Probes for Detecting Cell Death. *Bioconjugate Chemistry* **2010**, 21 (5), 884-891.
12. Massa, S.; Xavier, C.; De Vos, J.; Caveliers, V.; Lahoutte, T.; Muyldermans, S.; Devoogdt, N., Site-Specific Labeling of Cysteine-Tagged Camelid Single-Domain Antibody-Fragments for Use in Molecular Imaging. *Bioconjugate Chemistry* **2014**, 25 (5), 979-988.
13. Mecca, T.; Superchi, S.; Giorgio, E.; Rosini, C., 1,1'-Binaphthylazepine-based ligands for asymmetric catalysis. Part 1: Preparation and characterization of some new aminoalcohols and diamines. *Tetrahedron: Asymmetry* **2001**, 12 (8), 1225-1233.
14. Bathich, Y.; Syed Monudeen Khan, S. E. b.; Hamzah, A. S., Novel Isoxazoliny Spiropyrrolidinediones: 1,3-Dipolar Cycloaddition of 1-Benzyl-3,3-dimethyl-5-methylenepyrrolidin-2,4-dione. *Synlett* **2011**, 2011 (08), 1154-1156.
15. Neumann, J. J.; Rakshit, S.; Dröge, T.; Glorius, F., Palladium-Catalyzed Amidation of Unactivated C(sp<sup>3</sup>)-H Bonds: from Anilines to Indolines. *Angewandte Chemie International Edition* **2009**, 48 (37), 6892-6895.
16. Caliendo, G.; Grieco, P.; Perissutti, E.; Santagada, V.; Santini, A.; Albrizio, S.; Fattorusso, C.; Pinto, A.; Sorrentino, R., Synthesis, biological activity and conformational study of 1,4-benzoxazine derivatives as potassium channel modulators. *European Journal of Medicinal Chemistry* **1998**, 33 (12), 957-967.
17. Morgentin, R.; Jung, F.; Lamorlette, M.; Maudet, M.; Ménard, M.; Plé, P.; Pasquet, G.; Renaud, F., An efficient large-scale synthesis of alkyl 5-hydroxy-pyridin- and pyrimidin-2-yl acetate. *Tetrahedron* **2009**, 65 (4), 757-764.
